# Supplementary material for: Prickle and Ror modulate Dishevelled-Vangl interaction to regulate non-canonical Wnt signaling during convergent extension in Xenopus
Source: eLife. 2026 Apr 30;12:RP91199. doi: 10.7554/eLife.91199 (PMC13132548; doi:10.7554/eLife.91199)
Supplement: Source data 1. [file elife-91199-data1.xlsx]

## Sheet: Figure 1
Length to Width Ratio	Fig1 a'							Length to Width Ratio	Fig1 b'					Length to Width Ratio	Fig1 c'					Length to Width Ratio	Fig1 d'						Length to Width Ratio	Fig1 e'				Length to Width Ratio	Fig1 f'							Length to Width Ratio	Fig1 g'						Relative Length to Width Ratio	Fig1 h'
	un-inject	mVangl2 0.1	mVangl2 0.1 + Xpk 0.025	mVangl2 0.1 + Xpk 0.1	mVangl2 0.1 + Xpk 0.5	Xpk 0.5			uninject	Vangl2 0.1	mVangl2 0.1 + mPk2 0.25	mPk2 0.25			uninject	mVangl2 0.15	mVangl2 0.15 + pkMO 100ng	pkMO 100ng			uninject	Vangl2MO 30	Vangl2MO 30+mPk 0.1	Vangl2MO 30+mPk 0.25	Vangl2MO 30+mPk 0.5			uninject	Dvl2 0.5	Dvl2 0.5+pk0.25			uninject	Dvl 0.5	Dvl 0.5+pk 0.025	Dvl 0.5+pk 0.1	Dvl 0.5+pk 0.5	pk 0.5			uninject	V 0.1	V 0.1+ P 0.5	V 0.1+ P 0.5 + D 0.25	Pk 0.5				+Activin
	7.12107	5.80527	5.17985	4.21031	4.1432	6.03485			5.90455	5.0428	1.65385	5.97101			4.84449	3.21325	3.28861	4.89728			9.95294	3.0523	2.58795	4.82379	5.20468			7.77124	4.4196	5.4557			5.29479	5.40416	4.4847	5.93882	6.08035	5.41268			5.23935	2.72669	1.93668	7.38091	5.52126			Ctr	Ctr
	7.36981	5.57439	5.22788	3.48033	3.60175	6.32044			6.62165	5.97244	2.09677	6.3587			5.51687	2.39496	2.63631	3.44714			8.65022	2.53223	2.34938	6.33214	5.1873			7.42082	4.48548	6.06865			7.53165	5.03863	5.46065	5.21698	5.75998	4.65395			6.76696	4.24417	1.63814	2.99502	8.04508			0.925157	3.66005
	7.01326	4.34996	5.60316	1.93733	4.04167	8.2057			4.55916	5.50512	3.77586	6.23913			5.7224	2.91771	5.45632	4.07785			7.92043	2.87044	1.89181	4.33471	7.4733			6.59641	2.96172	5.75994			6.07317	4.55197	4.35397	5.88652	7.64854	4.09687			7.12549	3.67857	2.1881	4.26415	8.04433			0.948544	4.01193
	6.84241	4.39717	6.16191	3.47323	1.43017	7.46789			4.47438	4.03308	2.01822	6.48252			6.34242	2.31959	3.44421	3.76553			7.79842	2.17013	2.38269	4.03316	6.14431			5.4367	4.36135	4.08024			5.91524	4.46993	4.39125	6.36038	6.97227	4.80107			6.4978	4.28012	2.42595	5.358	5.19291			0.930166	3.15213
	6.84714	4.04381	6.23034	3.61915	1.40834	6.28729			5.42694	3.39138	3.30547	7.488			5.32435	2.00644	3.11104	4.77357			9.13519	2.19991	3.66074	3.48616	3.95536			6.27929	4.16357	5.60225			8.07391	4.37138	4.1497	4.87542	5.39081	4.19207			5.92091	3.51518	2.23514	3.84302	4.61013			0.995011	4.35146
	7.00895	6.12913	7.15956	2.93525	2.21777	5.72923			5.99999	4.76778	1.8412	5.46014			4.93368	2.37681	3.11765	2.92092			8.43676	2.71111	2.09372	3.30338	5.10976			5.74141	2.89125	6.87306			6.36205	5.22009	4.13524	5.80269	4.17047	4.6151			6.06433	3.93674	1.83442	4.44304	6.28407			0.958551	3.20306
	7.42984	3.95582	4.47755	4.34983	1.88102	5.26074			6.9474	5.49856	2.88235	5.5942			5.98926	2.83752	2.7002	3.88953			6.91411	2.29051	2.19138	4.66888	6.36216			6.11754	4.10726	5.32707			6.30829	3.60399	4.39578	6.12995	6.58251	3.69547			6.74464	3.85882	1.69694	4.37556	5.22678			0.981933	3.52045
	6.9577	4.88129	5.14706	2.08397	4.35142	4.12987			7.80041	3.16982	4.13235	6.12222			5.20392	3.44293	3.90956	3.13202			7.44269	2.28087	1.98242	4.39972	3.88747			6.61928	3.55663	4.28397			5.33945	4.11525	3.90268	6.10722	3.95631	3.9703			5.71251	3.69366	2.26433	5.21858	5.29876			1.05969	3.09099
	6.55264	6.99634	4.65459	4.18348	3.88993	6.16865			4.81524	4.32579	2.54398	7.34855			5.78397	2.95355	3.13458	2.77515			7.05682	3.71536	2.14477	3.54662	3.65219			5.54099	4.65635	4.23695			5.33021	4.50161	2.35969	5.31009	6.95357	3.39113			6.23641	5.2729	2.10734	2.84866	4.19033			0.980273	3.69014
	7.02125	5.94008	5.54559	3.99198	1.54098	6.07069			5.43199	3.32149	4.49477	7.16			4.7537	2.7202	2.62148	3.52941			8.27542	3.47512	1.94072	5.4578	3.56247			4.26709	4.29009	4.43072			5.88152	5.06661	3.48674	4.53994	4.50855	4.71039			5.98879	5.19597	1.75253	2.72245	3.4111			0.965511	3.255
	6.51451	6.81706	4.51078	2.13593	3.88389	6.44497			6.02903	3.0699	2.19518	5.6314			5.81947	2.15022	2.78378	3.6954			9.73034	2.03759	2.29128	3.89119	3.39894			5.41571	3.66674	5.03631			6.66833	4.76421	3.41403	5.12257		5.03838			5.65294	5.38201	1.96199	6.45045	4.75789			1.03819	3.17702
	6.16819	5.85771	4.2633	5.97735	1.77164	5.74173			5.40314	2.84377	2.2433	7.45228			4.23638	3.05033	3.66239	4.93046			7.12451	2.50935	2.69683	2.24201	3.72646			6.65742	4.67726	4.66914			7.47436	3.28177	3.68045	5.50141					7.44699	5.85536	3.38912	3.82173	5.34584			1.03348	2.4376
	6.72777	5.16769	7.22717	4.13543	4.0095	7.87178			4.48002	3.06973	1.85905	6.70543			7.20244	2.69388	3.08527	4.39136				3.88985	2.99262	3.10917	2.69426			6.71444	4.24896	5.21036			7.25073	3.86398	6.15531	5.03685						6.78608	2.25309	2.67702	6.27919			0.964888	2.46889
	7.67415	6.01184	3.95285	2.71383	1.72808	7.2147			7.29821	4.03135	2.17363	5.70036			4.65775	3.32808	3.26501	3.69057				4.77128	2.39655	5.56555	5.82808			8.24722	4.03021	6.14937			5.51213	4.18946	6.52453	5.20304						2.91778	3.18255	4.62538	4.33574			1.06378
	6.50828		6.96741	3.84168	2.3624				5.09994	5.57026	2.11461	6.71901			4.66699	3.63845	3.11488	4.42569				2.67988	2.0955	2.65371	4.91927			6.17387	2.99996	4.81198			6.64546	7.02837	5.51809	6.10007						4.68289	1.936	4.46111	5.10184			1.06846
	8.07789		5.40171	4.73985	4.6209				5.12544	4.05542	2.78663	6.892			6.07926	2.75194	2.65919	3.87198				2.20398	2.66626	3.29639	2.84524			5.56117	3.91495	5.60414				5.4791	2.92206	6.09989							2.46129	2.28399				1.08636
	7.19757		4.32947	2.51556	1.44244				5.1583	4.07929	2.46335	7.1453			5.58705	2.82452	3.70475	3.23957				1.75364	2.49184	2.66677	3.89895			5.14564	4.27015	5.65763				4.81483	3.07941	5.92115							1.82042	3.59328
	6.0391		4.35436	3.06481	2.36983				6.35891	3.88142	2.26545	5.51311			5.06821	3.2455	3.59338	4				2.0661	2.30786	2.67201	3.81574			5.75663	4.33065	7.34918					2.42293	6.42744							1.73244	5.07014
	6.75517		7.13531		1.6846				5.84413	3.86618	1.67542	6.13077			6.6119	3.68207	3.14247	4.66786				2.09168		3.3475	6.97552			5.8076	4.1859	7.27043					3.33912	6.14378							1.92829	3.53946
	7.71283				2.31728					2.76726	3.65957	5.79783			4.73041	3.86083	2.80669	3.89263				2.89134		2.29274	6.67782			5.51874	2.88884	4.19512						5.34648							2.16067	3.32316
	6.02872									3.2003	2.5402	4.59155				2.38218	4.24513	4.17664				2.29104		2.85323	4.02902			5.6431	4.33664	5.01203						6.42617							2.3449
										5.35875	2.49279	6.94186				4.40063	4.81025	3.76084						2.07037				7.03966	3.09855	4.10296						5.94529							2.4906
										4.70049	4.47038	7.60081					4.23373	4.22736						3.36533					3.42947	5.32534						4.44492
										5.53697	4.01805	5.5371					5.10714	3.44019						3.24757					3.5117	5.56559						5.6845
										3.87485	1.54844	7.06855						3.54545						4.38017					3.9519	4.68019						5.68722
										3.21649	3.61433	6.38996						3.19337						3.6372					2.63282	5.93472
											2.48485							3.43574						3.66756					3.392	5.63817
											3.22832							4.1308						4.74484					3.91735	6.98988
											1.98125							4.3458											4.11	5.25828
											1.47586																		3.77505	4.28709
[truncated: 5 more columns]

## Sheet: Figure 1— figure supplement 1
Length to Width Ratio	Fig1 suppl 1 a'					Length to Width Ratio	Fig1 suppl 1b'				Normalized Length	Fig1 suppl 1c'					Normalized Length	Fig1 suppl 1d'
	uninject	Xpk 0.5	Xpk 1	Xpk 2			uninject	XpkMO 100	XpkMO 200			Act-	Act+	Act+ PKMO25	Act+ PKMO100			Act-	Act+	Act+ XpkMO 100	Act+ XpkMO +mPK2 0.25
	8.78095	9.12477	9.653	3.338			5.24714	2.80097	3.64124			0.524	0.766	0.827	0.8			0.3307	0.72975	0.43906	0.58555
	10.5712	7.8998	7.399	4.964			6.61133	4.43534	2.99859			0.534	0.937	0.853	0.707			0.363823	0.661905	0.484637	0.609526
	9.41263	7.35536	8.399	4.653			5.93797	4.37718	2.75628			0.588	0.732	0.806	0.676			0.324343	0.792413	0.412319	0.679868
	9.25931	8.55429	6.844	3.661			6.13867	5.66165	4.29264			0.554	0.735	0.88	0.558			0.381506	0.69001	0.408208	0.591815
	10.2041	7.50819	7.668	6.409			5.14082	5.38225	5.20097			0.613	0.652	0.924	0.648			0.324343	0.632609	0.415817	0.652321
	8.71882	8.84588	7.234	5.032			7.28963	5.15385	3.53663			0.526	0.731	0.656	0.694			0.311823	0.583261	0.373203	0.634889
	9.87573	9.35252	8.435	1.904			6.82008	4.32406	4.18051			0.577	0.925	0.656	0.616			0.328246	0.749658	0.506285	0.59437
	7.79904	8.35379	7.136	3.384			8.35493	5.45372	3.31219			0.538	1.025	0.728	0.588			0.325525	0.664643	0.615572	0.628665
	9.20087	8.04014	7.338				7.41314	5.07276	4.01924			0.552	0.816	0.83	0.567			0.276062		0.604051	0.523546
	8.34069	9.83228	7.602				7.32697	6.11719	4.16241				0.849	1.006
	8.32036	9.58683	6.538					4.53255	3.31948
	8.97026		8.029					4.47463	3.22345
								5.54466	2.69072
								5.26692	4.43277
								5.02377	2.70425
								4.73575	5.24714
								4.34286	4.32406
								4.55077	3.32585
								6.5	5.93797
								5.40946	3.55729
								4.44252	4.43534
								2.0752	5.14082
									3.83446

## Sheet: Figure 2
mean intensity ratio of XPk	Fig2 f				Relative co-IP	Fig2 g			Length to Width Ratio	FIg2 i
	XPk	XPk+Vangl2	XPk+Vangl2-RH			Vangl-GFP+Pk	Vangl-RH-GFP+Pk			uninject	Vangl2 0.05	Vangl2 0.05+ Pk 0.5	Vangl2 RH 0.05	Vangl2 RH 0.05+ Pk 0.5	Pk 0.5
	1.78741	2.8329	1.97304			1	0.415169			6.997	6.18884	1.67602	5.32332	4.25007	3.28235
	1.79911	2.40281	1.96324			1	0.421296			4.872	6.35984	2.91739	4.95148	4.33037	5.55579
	1.29758	3.19902	1.62776			1	0.543022			6.254	5.552	1.73967	5.60143	3.82368	5.082
	1.63442	2.74557	1.53531							6.335	4.50263	3.15532	5.87267	4.12481	6.12155
	1.7004	2.16174	1.48008							7.534	6.35764	2.76233	5.5413	4.00329	3.54427
	1.41594	2.45151	1.41355							6.279	6.47544	2.62738	6.26927	3.61906	5.85983
	1.63378	2.80762	1.80789							6.347	6.7069	4.26711	5.02146	4.54282	7.44956
	1.476	3.01261	1.57888							6.498	6.26219	2.81482	4.76769	5.04358	5.47619
	1.59761	3.05319	1.6505							6.73	4.10368	2.86185	5.1212	3.11132	4.66638
	1.75574	2.80067	1.21854							6.413	3.51	1.53776	5.0121	5.02974	5.78689
	1.26936	2.3806	1.60978							6.05	5.71487	2.9482	6.34862	3.51514	5.33349
		3.47164	1.71485							6.162	5.31749	1.85547	6.49783	3.20754	6.33401
		2.28408	1.60778							7.624	4.30589	2.25785	5.55717	5.08328	5.90534
		2.78239	1.38744							6.01	4.74962	2.03447	5.58112	4.14184	6.02919
		2.4538								5.959	4.72448	1.86618	6.78098	4.3401	5.51727
										5.218	3.90162		6.98041	3.89528	6.05617
											4.1863				4.67525
															4.85554

## Sheet: Figure 2— figure supplement 3
Normalized membrane/ cytoplasm ratio	Fig2 suppl3 e
	Pk	Pk+Vangl2	Pk+xVangMO	Pk+xVangMO+Vangl2
	0.824112	1.29543	0.459413	0.6905
	0.951734	1.44821	0.345937	0.774035
	0.73158	1.32109	0.4764	0.680973
	0.605556	2.10926	0.406864	0.674508
	0.726464	2.16685	0.40677	0.840979
	0.985812	1.87174	0.558612	1.06207
	0.539294	1.33048	0.29802	0.779247
	0.628497	1.26777	0.327474	0.69947
	0.871602	1.32158	0.308146	1.04375

## Sheet: Figure 2— figure supplement 4
mean intensity ratio of Dvl2	Fig 2 suppl 4d
	Dvl2	Dvl2+ Vangl2	Dvl2+ Vangl2-RH
	1.10617	1.49461	1.73206
	1.0948	1.76833	1.68019
	1.32428	1.69091	1.7504
	1.18414	1.86067	1.62043
	1.11571	1.67324	1.88854
	1.24213	1.6297	1.65222
	1.03395	1.47005	1.58979
	1.03821	1.63467	1.74793
	1.30411	1.62912	1.6322
	1.11594	1.51098	1.80593
	1.03716	1.38232	1.66741
	1.0961	1.68961	1.61562
	1.06791	1.66947	1.80503
	1.43674	1.65107	1.59027
	1.16043	2.02194	1.44576
		1.60147	1.53813
		1.7331	1.67054
		1.65787	1.57195
		1.62032	1.76953
		1.85068

## Sheet: Figure 2— figure supplement 5
Length to Width Ratio	Fig2 suppl 5 a'						Length to Width Ratio	Fig2 suppl 5 b'
	Uninject	Vangl2 0.1	Vangl2 RH 0.1	Vangl2 0.2	Vangl2 RH 0.2			Uninject	Fz+Dvl	Fz+Dvl+Vangl2	Fz+Dvl+Vangl2-RH
	6.422	3.791	4.507	2.396	5.39			8.91002	2.27603	4.566	2.802
	6.506	3.677	6.938	1.715	3.887			8.72939	2.10815	3.82196	3.16895
	7.901	4.647	5.353	1.863	4.789			9.07668	1.77542	4.71922	2.1808
	5.146	4.564	5.973	1.787	3.936			7.62191	2.59246	6.56062	2.92571
	5.762	3.695	3.271	1.918	4.245			7.63205	1.80393	3.79885	5.106
	5.308	3.822	4.936	1.854	4.666			6.70829	2.52923	4.16949	2.58997
	5.177	2.956	5.21	2.101	5.194			6.45238	2.53771	4.89438	2.44129
	6.559	3.871	5.987	2.342	2.952			6.87365	2.39295	5.69812	2.69692
	7.167	5.197	5.774	2.162	4.23			7.8637	2.13587	4.67134	3.13184
	6.548	4.368	3.976	1.977	3.827			7.04676	2.43735	4.14311	3.31854
	5.058	3.417	5.172	2.079	4.238			6.68935	2.35485	3.53396	2.68
	7.036	3.893	5.562	3.642	4.45			6.24896	2.92355	3.59528	2.74829
		3.453	5.588	2.168	4.678				2.90548	3.35817	2.89748
		4.276	6.592	1.64	4.178				2.78257	4.65685	2.38384
		4.075		3.027	3.724				2.37587	4.5702	2.49193
		4.07		1.724	3.456				2.88828	5.2641	3.29104
		4.903		1.823					2.89689	3.81513	3.6479
		4.189		1.643					2.45011	4.94854	3.33321
									2.07607	5.05536	3.39927
									2.2286	5.38083	3.07218
									2.30521	4.9182	4.48258
									3.62485	5.46589
									3.32131	5.18249
									2.84484	4.27359
										6.58587
										5.85957
										4.96661

## Sheet: Figure 3p
	pixel number	nomalized pixel number	E-Va	mChDvl		pixel number	nomalized pixel number	E-Va	mChDvl		pixel number	nomalized pixel number	E-Va	mChDvl		pixel number	nomalized pixel number	E-Va	mChDvl		pixel number	nomalized pixel number	E-Va	mChDvl		pixel number	nomalized pixel number	E-Va	mChDvl		pixel number	nomalized pixel number	E-Va	mChDvl
	1	1.20482	56.4103	0		1	1.17647	16.9014	2.8169		1	1.85185	30.9623	3.76569		1	1.75439	40.1961	21.0784		1	1.72414	25.5411	10.3896		1	1.17647	16.9014	2.8169		1	1.26582	23.5294	0
	2	2.40964	50.641	0.641026		2	2.35294	19.2488	7.98122		2	3.7037	29.2887	1.67364		2	3.50877	30.8824	15.1961		2	3.44828	16.8831	9.09091		2	2.35294	19.2488	7.98122		2	2.53165	31.7647	0.392157
	3	3.61446	44.2308	0		3	3.52941	14.0845	6.10329		3	5.55556	28.8703	1.25523		3	5.26316	43.1373	18.1373		3	5.17241	19.0476	6.06061		3	3.52941	14.0845	6.10329		3	3.79747	31.3725	0
	4	4.81928	37.8205	0		4	4.70588	20.1878	3.28638		4	7.40741	28.8703	1.25523		4	7.01754	34.3137	39.7059		4	6.89655	23.3766	4.7619		4	4.70588	20.1878	3.28638		4	5.06329	31.3725	0
	5	6.0241	37.8205	0		5	5.88235	17.8404	3.75587		5	9.25926	30.1255	1.25523		5	8.77193	37.7451	20.098		5	8.62069	22.5108	3.4632		5	5.88235	17.8404	3.75587		5	6.32911	31.3725	0
	6	7.22892	39.7436	0		6	7.05882	24.8826	15.9624		6	11.1111	30.5439	1.25523		6	10.5263	32.3529	32.3529		6	10.3448	28.1385	5.62771		6	7.05882	24.8826	15.9624		6	7.59494	20	0
	7	8.43373	42.9487	0		7	8.23529	27.6995	11.7371		7	12.963	30.9623	1.25523		7	12.2807	34.3137	19.1176		7	12.069	25.1082	19.9134		7	8.23529	27.6995	11.7371		7	8.86076	24.3137	1.56863
	8	9.63855	41.6667	0		8	9.41176	22.5352	10.7981		8	14.8148	25.1046	3.34728		8	14.0351	40.6863	21.5686		8	13.7931	25.1082	13.8528		8	9.41176	22.5352	10.7981		8	10.1266	24.3137	0
	9	10.8434	41.0256	0		9	10.5882	17.8404	10.3286		9	16.6667	28.4519	3.76569		9	15.7895	43.1373	12.2549		9	15.5172	20.3463	26.4069		9	10.5882	17.8404	10.3286		9	11.3924	24.3137	0
	10	12.0482	41.0256	0		10	11.7647	18.3099	20.6573		10	18.5185	28.8703	5.02092		10	17.5439	43.6275	26.9608		10	17.2414	20.3463	23.8095		10	11.7647	18.3099	20.6573		10	12.6582	19.2157	0.784314
	11	13.253	38.4615	2.5641		11	12.9412	22.0657	16.9014		11	20.3704	29.7071	6.27615		11	19.2982	48.0392	38.2353		11	18.9655	23.3766	34.1991		11	12.9412	22.0657	16.9014		11	13.9241	22.7451	0
	12	14.4578	41.0256	1.28205		12	14.1176	23.9437	13.1455		12	22.2222	31.3808	1.25523		12	21.0526	43.6275	37.7451		12	20.6897	23.8095	17.316		12	14.1176	23.9437	13.1455		12	15.1899	26.6667	0
	13	15.6627	43.5897	0		13	15.2941	24.4131	19.7183		13	24.0741	29.2887	5.02092		13	22.807	45.5882	26.9608		13	22.4138	23.8095	17.316		13	15.2941	24.4131	19.7183		13	16.4557	30.1961	3.52941
	14	16.8675	41.6667	0.641026		14	16.4706	21.5962	7.51174		14	25.9259	27.1967	8.78661		14	24.5614	47.549	35.2941		14	24.1379	29.0043	38.5281		14	16.4706	21.5962	7.51174		14	17.7215	25.8824	0
	15	18.0723	38.4615	0.641026		15	17.6471	27.6995	12.2066		15	27.7778	25.9414	24.2678		15	26.3158	34.8039	40.6863		15	25.8621	19.4805	31.1688		15	17.6471	27.6995	12.2066		15	18.9873	21.9608	1.96078
	16	19.2771	35.8974	1.28205		16	18.8235	34.2723	16.9014		16	29.6296	25.9414	24.2678		16	28.0702	35.2941	59.3137		16	27.5862	26.4069	42.4242		16	18.8235	34.2723	16.9014		16	20.2532	24.3137	9.01961
	17	20.4819	26.9231	19.2308		17	20	23.0047	21.5962		17	31.4815	29.7071	15.4812		17	29.8246	37.7451	48.5294		17	29.3103	20.7792	61.039		17	20	23.0047	21.5962		17	21.519	24.3137	9.80392
	18	21.6867	39.1026	18.5897		18	21.1765	16.9014	16.4319		18	33.3333	23.0126	36.8201		18	31.5789	37.7451	52.9412		18	31.0345	25.974	38.0952		18	21.1765	16.9014	16.4319		18	22.7848	27.451	2.7451
	19	22.8916	37.1795	10.2564		19	22.3529	21.1268	19.7183		19	35.1852	26.7782	25.9414		19	33.3333	42.6471	78.4314		19	32.7586	25.1082	33.3333		19	22.3529	21.1268	19.7183		19	24.0506	27.451	17.2549
	20	24.0964	35.8974	2.5641		20	23.5294	20.6573	32.3944		20	37.037	28.8703	55.2301		20	35.0877	40.1961	82.8431		20	34.4828	20.7792	32.9004		20	23.5294	20.6573	32.3944		20	25.3165	26.6667	35.2941
	21	25.3012	41.6667	34.6154		21	24.7059	23.0047	37.5587		21	38.8889	23.431	67.7824		21	36.8421	39.2157	100		21	36.2069	19.9134	33.7662		21	24.7059	23.0047	37.5587		21	26.5823	20.3922	32.9412
	22	26.506	40.3846	35.8974		22	25.8824	23.4742	44.1315		22	40.7407	25.523	59.4142		22	38.5965	34.8039	73.0392		22	37.931	19.4805	36.3636		22	25.8824	23.4742	44.1315		22	27.8481	18.8235	30.1961
	23	27.7108	39.7436	37.8205		23	27.0588	23.9437	44.6009		23	42.5926	27.6151	51.046		23	40.3509	29.902	65.1961		23	39.6552	16.4502	34.1991		23	27.0588	23.9437	44.6009		23	29.1139	22.7451	47.8431
	24	28.9157	36.5385	38.4615		24	28.2353	19.2488	60.0939		24	44.4444	27.6151	70.7113		24	42.1053	34.8039	58.3333		24	41.3793	32.0346	47.1861		24	28.2353	19.2488	60.0939		24	30.3797	21.1765	41.1765
	25	30.1205	39.1026	53.2051		25	29.4118	22.5352	57.7465		25	46.2963	31.7992	99.1632		25	43.8596	38.2353	68.1373		25	43.1034	24.6753	51.9481		25	29.4118	22.5352	57.7465		25	31.6456	18.0392	69.8039
	26	31.3253	38.4615	51.9231		26	30.5882	31.4554	54.9296		26	48.1481	30.5439	100		26	45.614	35.2941	84.3137		26	44.8276	24.6753	55.8442		26	30.5882	31.4554	54.9296		26	32.9114	25.8824	90.5882
	27	32.5301	37.8205	51.2821		27	31.7647	31.9249	66.6667		27	50	27.1967	62.3431		27	47.3684	33.3333	82.3529		27	46.5517	21.645	41.9913		27	31.7647	31.9249	66.6667		27	34.1772	16.4706	58.8235
	28	33.7349	42.9487	46.7949		28	32.9412	29.5775	52.5822		28	51.8519	27.1967	71.9665		28	49.1228	33.3333	76.9608		28	48.2759	19.4805	79.2208		28	32.9412	29.5775	52.5822		28	35.443	23.9216	58.0392
	29	34.9398	51.2821	47.4359		29	34.1176	29.5775	56.8075		29	53.7037	27.1967	81.59		29	50.8772	41.1765	68.1373		29	50	25.1082	50.2165		29	34.1176	29.5775	56.8075		29	36.7089	16.4706	48.6275
	30	36.1446	44.2308	56.4103		30	35.2941	29.5775	61.0329		30	55.5556	32.2176	72.3849		30	52.6316	30.8824	74.5098		30	51.7241	20.7792	60.6061		30	35.2941	29.5775	61.0329		30	37.9747	21.9608	82.7451
	31	37.3494	37.1795	65.3846		31	36.4706	26.2911	68.0751		31	57.4074	32.2176	46.8619		31	54.386	37.2549	70.098		31	53.4483	20.3463	100		31	36.4706	26.2911	68.0751		31	39.2405	12.1569	76.8627
	32	38.5542	46.7949	53.8462		32	37.6471	25.8216	61.9718		32	59.2593	32.2176	37.6569		32	56.1404	36.7647	93.1373		32	55.1724	25.5411	59.3074		32	37.6471	25.8216	61.9718		32	40.5063	16.4706	58.0392
	33	39.759	44.2308	61.5385		33	38.8235	24.4131	76.9953		33	61.1111	33.8912	58.5774		33	57.8947	31.3725	63.7255		33	56.8966	21.2121	84.4156		33	38.8235	24.4131	76.9953		33	41.7722	15.2941	70.9804
	34	40.9639	41.6667	69.2308		34	40	32.8638	60.5634		34	62.963	31.7992	43.9331		34	59.6491	38.2353	64.7059		34	58.6207	25.1082	63.6364		34	40	32.8638	60.5634		34	43.038	18.8235	58.4314
	35	42.1687	37.8205	41.6667		35	41.1765	29.108	56.8075		35	64.8148	30.5439	41.841		35	61.4035	43.6275	86.2745		35	60.3448	29.8701	59.3074		35	41.1765	29.108	56.8075		35	44.3038	21.5686	90.9804
	36	43.3735	40.3846	76.2821		36	42.3529	31.9249	62.4413		36	66.6667	29.7071	40.1674		36	63.1579	33.3333	59.3137		36	62.069	24.2424	72.7273		36	42.3529	31.9249	62.4413		36	45.5696	21.1765	68.6275
	37	44.5783	37.1795	71.1538		37	43.5294	30.9859	59.1549		37	68.5185	30.9623	30.1255		37	64.9123	38.7255	68.1373		37	63.7931	25.974	53.6797		37	43.5294	30.9859	59.1549		37	46.8354	21.5686	100
	38	45.7831	34.6154	66.6667		38	44.7059	24.4131	69.0141		38	70.3704	31.7992	33.4728		38	66.6667	41.6667	75.9804		38	65.5172	20.7792	47.1861		38	44.7059	24.4131	69.0141		38	48.1013	18.8235	93.3333
	39	46.988	57.6923	75.641		39	45.8824	31.4554	60.5634		39	72.2222	32.2176	23.0126		39	68.4211	31.8627	57.3529		39	67.2414	21.645	47.619		39	45.8824	31.4554	60.5634		39	49.3671	18.0392	60.7843
	40	48.1928	40.3846	76.2821		40	47.0588	25.3521	74.1784		40	74.0741	40.5858	20.5021		40	70.1754	39.2157	44.6078		40	68.9655	25.1082	58.4416		40	47.0588	25.3521	74.1784		40	50.6329	23.5294	87.0588
	41	49.3976	49.359	85.2564		41	48.2353	25.3521	71.3615		41	75.9259	36.8201	18.41		41	71.9298	35.2941	58.3333		41	70.6897	24.6753	52.8139		41	48.2353	25.3521	71.3615		41	51.8987	18.0392	100
	42	50.6024	36.5385	83.3333		42	49.4118	25.8216	68.0751		42	77.7778	33.0544	16.318		42	73.6842	35.2941	67.1569		42	72.4138	26.4069	38.5281		42	49.4118	25.8216	68.0751		42	53.1646	18.0392	75.6863
	43	51.8072	39.7436	88.4615		43	50.5882	26.2911	64.7887		43	79.6296	34.3096	16.7364		43	75.4386	41.6667	48.5294		43	74.1379	26.8398	53.2468		43	50.5882	26.2911	64.7887		43	54.4304	17.6471	70.1961
	44	53.012	42.9487	93.5897		44	51.7647	25.8216	84.0376		44	81.4815	33.4728	4.60251		44	77.193	38.2353	45.098		44	75.8621	19.0476	52.381		44	51.7647	25.8216	84.0376		44	55.6962	21.9608	63.1373
	45	54.2169	49.359	100		45	52.9412	31.9249	81.2207		45	83.3333	30.5439	5.43933		45	78.9474	36.2745	40.1961		45	77.5862	23.3766	24.6753		45	52.9412	31.9249	81.2207		45	56.962	23.9216	80
	46	55.4217	37.1795	76.9231		46	54.1176	19.2488	69.4836		46	85.1852	30.5439	5.43933		46	80.7018	32.3529	21.5686		46	79.3103	16.8831	31.1688		46	54.1176	19.2488	69.4836		46	58.2278	21.1765	87.8431
	47	56.6265	40.3846	87.1795		47	55.2941	28.169	84.0376		47	87.037	33.0544	6.27615		47	82.4561	39.7059	26.4706		47	81.0345	21.645	27.7056		47	55.2941	28.169	84.0376		47	59.4937	26.6667	75.2941
	48	57.8313	43.5897	98.0769		48	56.4706	27.23	76.5258		48	88.8889	33.0544	6.27615		48	84.2105	34.3137	33.8235		48	82.7586	18.6147	16.0173		48	56.4706	27.23	76.5258		48	60.7595	23.5294	56.0784
	49	59.0361	47.4359	66.6667		49	57.6471	30.9859	79.3427		49	90.7407	26.3598	2.51046		49	85.9649	36.7647	30.3922		49	84.4828	23.3766	26.8398		49	57.6471	30.9859	79.3427		49	62.0253	21.1765	67.451
	50	60.241	45.5128	83.9744		50	58.8235	35.2113	82.1596		50	92.5926	31.7992	4.1841		50	87.7193	33.3333	22.0588		50	86.2069	21.2121	26.4069		50	58.8235	35.2113	82.1596		50	63.2911	19.6078	50.9804
	51	61.4458	45.5128	88.4615		51	60	34.2723	67.6056		51	94.4444	28.8703	5.43933		51	89.4737	39.7059	40.6863		51	87.931	24.2424	9.52381		51	60	34.2723	67.6056		51	64.557	18.0392	45.098
	52	62.6506	41.0256	67.3077		52	61.1765	25.8216	80.7512		52	96.2963	25.523	3.76569		52	91.2281	37.7451	35.2941		52	89.6552	21.645	12.5541		52	61.1765	25.8216	80.7512		52	65.8228	23.1373	41.1765
	53	63.8554	36.5385	46.1538		53	62.3529	29.108	92.4883		53	98.1481	26.7782	4.60251		53	92.9825	35.2941	20.5882		53	91.3793	21.2121	5.62771		53	62.3529	29.108	92.4883		53	67.0886	18.8235	69.8039
	54	65.0602	32.0513	33.3333		54	63.5294	23.4742	90.6103		54	100	31.3808	2.51046		54	94.7368	43.6275	24.0196		54	93.1034	16.8831	5.62771		54	63.5294	23.4742	90.6103		54	68.3544	20.7843	50.1961
	55	66.2651	38.4615	44.2308		55	64.7059	23.4742	84.507							55	96.4912	37.2549	21.0784		55	94.8276	31.1688	14.2857		55	64.7059	23.4742	84.507		55	69.6203	22.7451	56.8627
	56	67.4699	41.0256	55.7692		56	65.8824	23.9437	78.4038							56	98.2456	41.1765	19.1176		56	96.5517	22.5108	2.1645		56	65.8824	23.9437	78.4038		56	70.8861	24.7059	32.549
	57	68.6747	43.5897	67.9487		57	67.0588	23.4742	82.6291							57	100	37.2549	28.4314		57	98.2759	23.8095	0		57	67.0588	23.4742	82.6291		57	72.1519	25.098	49.8039
	58	69.8795	47.4359	55.1282		58	68.2353	19.2488	100												58	100	25.5411	0.4329		58	68.2353	19.2488	100		58	73.4177	23.1373	64.7059
	59	71.0843	42.3077	46.7949		59	69.4118	26.7606	84.507																	59	69.4118	26.7606	84.507		59	74.6835	21.1765	47.451
	60	72.2892	46.7949	29.4872		60	70.5882	27.23	65.7277																	60	70.5882	27.23	65.7277		60	75.9494	27.451	28.2353
	61	73.494	41.6667	25.641		61	71.7647	22.0657	72.3005																	61	71.7647	22.0657	72.3005		61	77.2152	23.1373	25.8824
	62	74.6988	37.1795	22.4359		62	72.9412	23.4742	56.338																	62	72.9412	23.4742	56.338		62	78.481	25.4902	23.5294
	63	75.9036	46.7949	28.2051		63	74.1176	25.3521	51.6432																	63	74.1176	25.3521	51.6432		63	79.7468	28.2353	21.5686
	64	77.1084	48.0769	35.8974		64	75.2941	25.8216	30.9859																	64	75.2941	25.8216	30.9859		64	81.0127	24.3137	11.3725
	65	78.3133	51.2821	27.5641		65	76.4706	27.6995	25.8216																	65	76.4706	27.6995	25.8216		65	82.2785	21.1765	19.2157
	66	79.5181	54.4872	19.2308		66	77.6471	27.6995	18.7793																	66	77.6471	27.6995	18.7793		66	83.5443	24.7059	0.784314
	67	80.7229	52.5641	16.0256		67	78.8235	26.2911	16.9014																	67	78.8235	26.2911	16.9014		67	84.8101	27.0588	1.56863
	68	81.9277	58.3333	2.5641		68	80	20.6573	14.554																	68	80	20.6573	14.554		68	86.0759	25.098	5.09804
	69	83.1325	50	5.12821		69	81.1765	15.493	18.3099																	69	81.1765	15.493	18.3099		69	87.3418	27.0588	4.31373
	70	84.3373	41.6667	0		70	82.3529	23.9437	11.7371																	70	82.3529	23.9437	11.7371		70	88.6076	26.6667	1.17647
	71	85.5422	48.0769	1.28205		71	83.5294	17.8404	11.2676																	71	83.5294	17.8404	11.2676		71	89.8734	26.6667	0
	72	86.747	44.8718	5.12821		72	84.7059	31.9249	5.6338																	72	84.7059	31.9249	5.6338		72	91.1392	23.1373	0
	73	87.9518	48.0769	2.5641		73	85.8824	26.7606	10.3286																	73	85.8824	26.7606	10.3286		73	92.4051	27.0588	0
	74	89.1566	53.8462	5.12821		74	87.0588	26.7606	10.3286																	74	87.0588	26.7606	10.3286		74	93.6709	21.1765	0
	75	90.3614	41.6667	3.84615		75	88.2353	29.5775	19.2488																	75	88.2353	29.5775	19.2488		75	94.9367	23.9216	0
	76	91.5663	45.5128	3.84615		76	89.4118	24.4131	15.9624																	76	89.4118	24.4131	15.9624		76	96.2025	20	0
	77	92.7711	51.2821	1.28205		77	90.5882	24.8826	11.2676																	77	90.5882	24.8826	11.2676		77	97.4684	25.098	0
	78	93.9759	48.0769	4.48718		78	91.7647	34.7418	15.9624																	78	91.7647	34.7418	15.9624		78	98.7342	25.4902	1.96078
	79	95.1807	38.4615	0		79	92.9412	28.6385	14.554																	79	92.9412	28.6385	14.554		79	100	29.0196	0
	80	96.3855	48.0769	0		80	94.1176	23.0047	13.1455																	80	94.1176	23.0047	13.1455
	81	97.5904	50.641	0.641026		81	95.2941	28.169	11.2676																	81	95.2941	28.169	11.2676
	82	98.7952	44.2308	0		82	96.4706	27.6995	12.2066																	82	96.4706	27.6995	12.2066
	83	100	37.8205	0		83	97.6471	29.5775	5.16432																	83	97.6471	29.5775	5.16432
						84	98.8235	31.4554	5.6338																	84	98.8235	31.4554	5.6338
						85	100	33.8028	6.10329																	85	100	33.8028	6.10329

## Sheet: Figure 3q
	pixel	nomalized pixel No	E-Va	mChDvl		pixel	nomalized pixel No	E-Va	mChDvl		pixel	nomalized pixel No	E-Va	mChDvl		pixel	nomalized pixel No	E-Va	mChDvl		pixel	nomalized pixel No	E-Va	mChDvl		pixel	nomalized pixel No	E-Va	mChDvl		pixel	nomalized pixel No	E-Va	mChDvl
	1	1.20482	1.27119	1.69492		1	1.03093	5.19481	9.74026		1	1.25	0	4.16667		1	0.763359	0.784314	12.9412		1	1.5625	2.87081	4.30622		1	1.49254	2.35294	4.31373		1	1.66667	5.03597	7.19424
	2	2.40964	0.847458	3.38983		2	2.06186	3.24675	11.6883		2	2.5	0	6.06061		2	1.52672	1.17647	9.41176		2	3.125	4.30622	8.61244		2	2.98507	2.35294	7.45098		2	3.33333	2.15827	17.2662
	3	3.61446	0.847458	0.423729		3	3.09278	3.8961	11.039		3	3.75	0	9.4697		3	2.29008	0.392157	6.27451		3	4.6875	5.74163	13.3971		3	4.47761	1.17647	8.23529		3	5	4.31655	15.1079
	4	4.81928	2.11864	2.11864		4	4.12371	2.5974	14.2857		4	5	0	5.68182		4	3.05344	0.392157	7.45098		4	6.25	5.74163	12.9187		4	5.97015	2.7451	8.62745		4	6.66667	6.47482	13.6691
	5	6.0241	1.27119	0.423729		5	5.15464	5.84416	14.2857		5	6.25	0	3.78788		5	3.81679	1.96078	2.7451		5	7.8125	5.26316	10.5263		5	7.46269	1.96078	3.52941		5	8.33333	3.59712	10.7914
	6	7.22892	0.847458	4.66102		6	6.18557	4.54545	11.6883		6	7.5	0	5.30303		6	4.58015	0.392157	7.45098		6	9.375	5.26316	12.9187		6	8.95522	2.35294	4.70588		6	10	3.59712	9.35252
	7	8.43373	0.847458	3.81356		7	7.21649	3.8961	12.3377		7	8.75	0	0.757576		7	5.34351	0.392157	9.01961		7	10.9375	5.74163	18.1818		7	10.4478	3.52941	5.88235		7	11.6667	4.31655	11.5108
	8	9.63855	1.27119	5.9322		8	8.24742	3.24675	10.3896		8	10	0	0.757576		8	6.10687	0.784314	2.35294		8	12.5	6.2201	23.445		8	11.9403	2.35294	5.4902		8	13.3333	5.7554	14.3885
	9	10.8434	5.08475	5.08475		9	9.27835	3.24675	18.1818		9	11.25	0	4.16667		9	6.87023	0.392157	3.52941		9	14.0625	8.13397	41.1483		9	13.4328	1.96078	11.3725		9	15	5.7554	14.3885
	10	12.0482	3.81356	2.11864		10	10.3093	5.19481	20.7792		10	12.5	0.378788	3.40909		10	7.63359	0.392157	4.70588		10	15.625	8.13397	16.7464		10	14.9254	3.13725	5.4902		10	16.6667	3.59712	11.5108
	11	13.253	2.54237	2.9661		11	11.3402	2.5974	9.74026		11	13.75	0	4.54545		11	8.39695	1.17647	7.05882		11	17.1875	8.13397	15.311		11	16.4179	3.52941	5.4902		11	18.3333	5.03597	15.1079
	12	14.4578	5.9322	6.77966		12	12.3711	7.14286	11.6883		12	15	0.378788	6.06061		12	9.16031	1.96078	2.35294		12	18.75	6.69856	18.1818		12	17.9104	7.84314	7.05882		12	20	5.7554	12.9496
	13	15.6627	9.32203	11.0169		13	13.4021	3.24675	9.74026		13	16.25	0	17.0455		13	9.92366	1.17647	9.41176		13	20.3125	6.69856	22.9665		13	19.403	8.23529	12.1569		13	21.6667	11.5108	12.9496
	14	16.8675	8.89831	18.2203		14	14.433	3.8961	12.3377		14	17.5	1.51515	15.1515		14	10.687	0.784314	9.80392		14	21.875	7.17703	27.7512		14	20.8955	6.27451	7.05882		14	23.3333	17.9856	12.9496
	15	18.0723	5.50847	15.2542		15	15.4639	6.49351	12.3377		15	18.75	13.6364	29.1667		15	11.4504	1.17647	9.01961		15	23.4375	10.5263	15.7895		15	22.3881	7.45098	4.70588		15	25	15.1079	22.3022
	16	19.2771	8.05085	22.4576		16	16.4948	5.84416	17.5325		16	20	18.5606	13.2576		16	12.2137	0.392157	2.35294		16	25	14.8325	17.2249		16	23.8806	14.5098	26.6667		16	26.6667	20.8633	17.9856
	17	20.4819	7.20339	12.2881		17	17.5258	3.8961	14.9351		17	21.25	25.3788	28.4091		17	12.9771	0.784314	6.66667		17	26.5625	20.0957	36.3636		17	25.3731	14.1176	23.5294		17	28.3333	23.0216	20.8633
	18	21.6867	8.89831	19.4915		18	18.5567	7.14286	18.8312		18	22.5	21.5909	26.5152		18	13.7405	0.784314	5.4902		18	28.125	21.5311	33.9713		18	26.8657	16.0784	20		18	30	25.1799	23.741
	19	22.8916	11.0169	27.1186		19	19.5876	7.79221	20.1299		19	23.75	17.803	25		19	14.5038	1.56863	3.13725		19	29.6875	22.9665	32.0574		19	28.3582	19.2157	26.6667		19	31.6667	61.1511	33.0935
	20	24.0964	9.74576	21.1864		20	20.6186	7.79221	18.8312		20	25	59.8485	34.0909		20	15.2672	0.784314	4.31373		20	31.25	35.8852	19.6172		20	29.8507	36.0784	34.902		20	33.3333	84.1727	41.7266
	21	25.3012	8.89831	19.4915		21	21.6495	12.3377	22.7273		21	26.25	39.7727	28.7879		21	16.0305	0.392157	5.88235		21	32.8125	39.2344	48.8038		21	31.3433	39.6078	41.5686		21	35	84.1727	42.446
	22	26.506	12.2881	31.3559		22	22.6804	14.9351	20.1299		22	27.5	37.8788	30.6818		22	16.7939	0.392157	6.66667		22	34.375	43.5407	47.8469		22	32.8358	55.2941	27.8431		22	36.6667	84.1727	43.8849
	23	27.7108	17.3729	39.4068		23	23.7113	22.7273	20.1299		23	28.75	61.7424	35.9848		23	17.5573	0.392157	10.9804		23	35.9375	54.5455	53.5885		23	34.3284	47.0588	35.6863		23	38.3333	82.7338	55.3957
	24	28.9157	26.2712	22.0339		24	24.7423	37.013	25.3247		24	30	54.1667	31.8182		24	18.3206	0	3.92157		24	37.5	66.0287	59.3301		24	35.8209	51.7647	45.098		24	40	82.0144	48.9209
	25	30.1205	26.6949	31.7797		25	25.7732	38.961	31.1688		25	31.25	74.6212	54.1667		25	19.084	0.392157	7.05882		25	39.0625	56.4593	60.2871		25	37.3134	45.4902	29.4118		25	41.6667	86.3309	45.3237
	26	31.3253	27.1186	41.9492		26	26.8041	48.7013	35.7143		26	32.5	82.9545	32.9545		26	19.8473	0.784314	4.70588		26	40.625	75.1196	75.5981		26	38.806	47.8431	38.0392		26	43.3333	90.6475	42.446
	27	32.5301	33.8983	43.2203		27	27.8351	62.987	43.5065		27	33.75	96.5909	35.6061		27	20.6107	4.70588	8.62745		27	42.1875	95.2153	81.8182		27	40.2985	50.1961	47.0588		27	45	86.3309	59.7122
	28	33.7349	55.9322	42.7966		28	28.866	51.9481	46.1039		28	35	54.9242	41.2879		28	21.374	2.7451	11.7647		28	43.75	100	64.5933		28	41.791	59.2157	30.9804		28	46.6667	97.1223	64.0288
	29	34.9398	65.678	46.6102		29	29.8969	59.7403	52.5974		29	36.25	71.2121	45.8333		29	22.1374	5.4902	6.27451		29	45.3125	94.2584	75.1196		29	43.2836	47.451	38.0392		29	48.3333	97.1223	67.6259
	30	36.1446	57.2034	49.5763		30	30.9278	62.987	50		30	37.5	87.5	50.7576		30	22.9008	4.70588	13.3333		30	46.875	88.5167	86.1244		30	44.7761	74.5098	29.8039		30	50	97.1223	71.9424
	31	37.3494	60.1695	46.1864		31	31.9588	62.987	50		31	38.75	67.0455	37.8788		31	23.6641	6.27451	13.7255		31	48.4375	75.1196	96.1722		31	46.2687	89.0196	44.3137		31	51.6667	92.0863	62.5899
	32	38.5542	80.0847	64.8305		32	32.9897	74.026	46.1039		32	40	100	40.5303		32	24.4275	12.549	9.80392		32	50	85.6459	72.7273		32	47.7612	78.0392	37.2549		32	53.3333	100	58.2734
	33	39.759	100	83.4746		33	34.0206	94.8052	68.8312		33	41.25	87.1212	60.2273		33	25.1908	16.0784	16.0784		33	51.5625	85.6459	72.7273		33	49.2537	74.5098	52.9412		33	55	97.8417	69.0647
	34	40.9639	77.5424	69.9153		34	35.0515	75.974	55.1948		34	42.5	73.1061	41.2879		34	25.9542	29.0196	29.0196		34	53.125	75.1196	71.7703		34	50.7463	94.1176	52.1569		34	56.6667	95.6835	80.5755
	35	42.1687	72.8814	66.9492		35	36.0825	82.4675	61.6883		35	43.75	73.1061	41.2879		35	26.7176	29.0196	29.0196		35	54.6875	91.866	81.8182		35	52.2388	100	51.7647		35	58.3333	97.1223	48.2014
	36	43.3735	91.5254	79.2373		36	37.1134	79.8701	50		36	45	61.7424	48.8636		36	27.4809	40	34.5098		36	56.25	89.4737	87.5598		36	53.7313	79.6078	54.1176		36	60	88.4892	53.9568
	37	44.5783	76.6949	82.6271		37	38.1443	79.2208	55.1948		37	46.25	54.9242	37.1212		37	28.2443	56.8627	37.2549		37	57.8125	87.5598	93.3014		37	55.2239	77.6471	57.6471		37	61.6667	92.0863	56.8345
	38	45.7831	89.8305	77.9661		38	39.1753	91.5584	64.9351		38	47.5	72.3485	32.9545		38	29.0076	54.902	41.9608		38	59.375	90.4306	80.8612		38	56.7164	83.9216	48.6275		38	63.3333	95.6835	59.7122
	39	46.988	83.4746	72.8814		39	40.2062	77.9221	57.7922		39	48.75	68.1818	28.7879		39	29.771	73.7255	55.6863		39	60.9375	95.6938	87.5598		39	58.209	87.0588	37.2549		39	65	98.5612	48.9209
	40	48.1928	77.1186	67.7966		40	41.2371	100	64.2857		40	50	64.7727	45.8333		40	30.5344	80.3922	36.8627		40	62.5	95.2153	91.866		40	59.7015	80.3922	49.4118		40	66.6667	89.9281	57.554
	41	49.3976	86.4407	89.8305		41	42.268	96.7532	48.7013		41	51.25	68.9394	41.6667		41	31.2977	70.9804	43.5294		41	64.0625	94.7368	96.1722		41	61.194	100	62.7451		41	68.3333	89.9281	61.8705
	42	50.6024	86.4407	89.8305		42	43.299	76.6234	51.2987		42	52.5	75.3788	35.9848		42	32.0611	85.098	38.8235		42	65.625	98.0861	88.5167		42	62.6866	94.902	42.3529		42	70	90.6475	66.1871
	43	51.8072	79.661	76.2712		43	44.3299	76.6234	45.4545		43	53.75	60.9848	42.803		43	32.8244	78.4314	45.098		43	67.1875	97.1292	81.8182		43	64.1791	100	52.1569		43	71.6667	53.9568	50.3597
	44	53.012	82.6271	69.0678		44	45.3608	76.6234	44.8052		44	55	74.2424	50.7576		44	33.5878	100	44.3137		44	68.75	90.4306	70.3349		44	65.6716	78.8235	39.2157		44	73.3333	30.9353	33.8129
	45	54.2169	92.3729	76.2712		45	46.3918	88.961	61.6883		45	56.25	85.2273	52.2727		45	34.3511	93.7255	44.3137		45	70.3125	83.7321	59.3301		45	67.1642	84.3137	62.7451		45	75	26.6187	25.8993
	46	55.4217	97.8814	59.7458		46	47.4227	80.5195	63.6364		46	57.5	96.5909	54.1667		46	35.1145	100	43.9216		46	71.875	68.4211	59.3301		46	68.6567	87.451	62.7451		46	76.6667	22.3022	17.9856
	47	56.6265	66.9492	56.3559		47	48.4536	77.2727	46.7532		47	58.75	96.5909	37.1212		47	35.8779	68.2353	20.7843		47	73.4375	36.3636	39.2344		47	70.1493	76.8627	36.4706		47	78.3333	11.5108	27.3381
	48	57.8313	77.1186	66.9492		48	49.4845	89.6104	41.5584		48	60	64.7727	43.1818		48	36.6412	61.5686	35.6863		48	75	33.4928	24.4019		48	71.6418	86.6667	41.9608		48	80	15.8273	32.3741
	49	59.0361	87.7119	77.9661		49	50.5155	75.974	78.5714		49	61.25	46.2121	43.9394		49	37.4046	76.8627	44.3137		49	76.5625	31.1005	10.0478		49	73.1343	29.8039	33.3333		49	81.6667	7.91367	20.1439
	50	60.241	69.9153	82.2034		50	51.5464	98.7013	68.8312		50	62.5	71.5909	48.1061		50	38.1679	67.0588	41.5686		50	78.125	25.8373	41.1483		50	74.6269	27.451	31.7647		50	83.3333	6.47482	20.1439
	51	61.4458	71.6102	68.6441		51	52.5773	79.2208	70.7792		51	63.75	56.0606	40.1515		51	38.9313	67.451	47.0588		51	79.6875	16.7464	36.8421		51	76.1194	25.4902	30.5882		51	85	5.03597	20.8633
	52	62.6506	70.7627	81.7797		52	53.6082	87.013	64.9351		52	65	51.1364	29.1667		52	39.6947	64.7059	46.6667		52	81.25	21.5311	28.7081		52	77.6119	34.5098	21.9608		52	86.6667	6.47482	23.741
	53	63.8554	55.0847	85.1695		53	54.6392	94.1558	62.987		53	66.25	34.4697	38.6364		53	40.458	74.5098	33.3333		53	82.8125	11.9617	10.5263		53	79.1045	22.3529	27.8431		53	88.3333	5.7554	10.7914
	54	65.0602	53.3898	72.4576		54	55.6701	90.9091	75.974		54	67.5	62.5	30.6818		54	41.2214	75.6863	40.3922		54	84.375	13.3971	22.9665		54	80.597	18.0392	29.4118		54	90	4.31655	10.0719
	55	66.2651	52.1186	59.7458		55	56.701	74.6753	48.7013		55	68.75	64.0152	23.1061		55	41.9847	72.9412	24.7059		55	85.9375	6.2201	15.311		55	82.0896	9.80392	10.9804		55	91.6667	2.8777	9.35252
	56	67.4699	82.6271	60.5932		56	57.732	70.7792	53.2468		56	70	57.197	26.1364		56	42.7481	85.4902	45.4902		56	87.5	6.69856	9.56938		56	83.5821	8.23529	9.01961		56	93.3333	5.03597	10.0719
	57	68.6747	64.8305	50.8475		57	58.7629	83.1169	38.961		57	71.25	50.3788	29.5455		57	43.5115	85.4902	45.4902		57	89.0625	4.78469	11.9617		57	85.0746	6.27451	3.92157		57	95	2.15827	8.63309
	58	69.8795	38.1356	34.7458		58	59.7938	92.2078	60.3896		58	72.5	35.2273	13.6364		58	44.2748	76.4706	38.8235		58	90.625	2.87081	14.8325		58	86.5672	3.13725	8.62745		58	96.6667	5.7554	5.03597
	59	71.0843	43.6441	29.2373		59	60.8247	86.3636	69.4805		59	73.75	21.2121	12.1212		59	45.0382	88.2353	40		59	92.1875	4.78469	10.5263		59	88.0597	3.52941	6.27451		59	98.3333	6.47482	14.3885
	60	72.2892	33.4746	33.8983		60	61.8557	85.7143	72.0779		60	75	13.2576	11.7424		60	45.8015	76.8627	49.4118		60	93.75	2.87081	3.34928		60	89.5522	2.35294	3.92157		60	100	0.431655	1.43885
	61	73.494	23.3051	38.9831		61	62.8866	87.013	48.7013		61	76.25	8.71212	7.19697		61	46.5649	63.9216	44.3137		61	95.3125	3.82775	8.61244		61	91.0448	1.56863	5.88235
	62	74.6988	15.2542	30.9322		62	63.9175	81.1688	59.7403		62	77.5	8.71212	7.19697		62	47.3282	80	31.3725		62	96.875	3.34928	21.5311		62	92.5373	2.35294	9.41176
	63	75.9036	22.0339	13.1356		63	64.9485	85.0649	63.6364		63	78.75	3.40909	9.4697		63	48.0916	78.8235	29.4118		63	98.4375	1.91388	11.0048		63	94.0299	1.56863	7.05882
	64	77.1084	8.47458	13.5593		64	65.9794	96.1039	56.4935		64	80	3.78788	9.84848		64	48.855	69.8039	41.5686		64	100	1.91388	19.1388		64	95.5224	1.17647	4.70588
	65	78.3133	2.9661	11.0169		65	67.0103	86.3636	42.2078		65	81.25	2.65152	5.68182		65	49.6183	80	29.0196							65	97.0149	1.17647	2.35294
	66	79.5181	3.38983	8.47458		66	68.0412	80.5195	47.4026		66	82.5	4.54545	17.0455		66	50.3817	91.7647	26.2745							66	98.5075	1.56863	4.31373
	67	80.7229	3.81356	5.9322		67	69.0722	87.6623	44.1558		67	83.75	3.0303	6.81818		67	51.145	76.0784	52.9412							67	100	1.17647	6.27451
	68	81.9277	1.27119	5.50847		68	70.1031	71.4286	46.7532		68	85	0.757576	9.4697		68	51.9084	89.0196	50.9804
	69	83.1325	4.66102	7.20339		69	71.134	75.974	59.0909		69	86.25	0.757576	9.4697		69	52.6718	96.0784	40
	70	84.3373	1.27119	13.5593		70	72.1649	64.9351	25.974		70	87.5	0	4.92424		70	53.4351	89.4118	47.8431
	71	85.5422	4.23729	5.9322		71	73.1959	56.4935	35.0649		71	88.75	0	4.54545		71	54.1985	76.0784	32.1569
	72	86.747	3.38983	5.08475		72	74.2268	50	32.4675		72	90	0.378788	6.06061		72	54.9618	61.5686	49.0196
	73	87.9518	2.9661	4.66102		73	75.2577	40.2597	25.3247		73	91.25	0	1.51515		73	55.7252	82.7451	45.8824
	74	89.1566	2.11864	8.05085		74	76.2887	40.9091	31.1688		74	92.5	0	4.54545		74	56.4885	55.6863	55.2941
	75	90.3614	0.847458	8.05085		75	77.3196	31.1688	30.5195		75	93.75	0.757576	3.40909		75	57.2519	75.6863	55.6863
	76	91.5663	2.54237	5.50847		76	78.3505	26.6234	23.3766		76	95	1.51515	2.65152		76	58.0153	60.3922	50.5882
	77	92.7711	0.847458	2.54237		77	79.3814	22.7273	24.6753		77	96.25	0	7.95455		77	58.7786	54.902	26.6667
	78	93.9759	0.847458	3.38983		78	80.4124	21.4286	15.5844		78	97.5	0	6.43939		78	59.542	45.4902	31.7647
	79	95.1807	1.27119	1.69492		79	81.4433	16.2338	14.2857		79	98.75	1.51515	8.71212		79	60.3053	47.451	36.8627
	80	96.3855	0.847458	3.81356		80	82.4742	9.74026	13.6364		80	100	1.89394	1.89394		80	61.0687	62.7451	39.6078
	81	97.5904	0.847458	2.9661		81	83.5052	9.09091	18.8312							81	61.8321	62.7451	39.6078
	82	98.7952	0.847458	2.54237		82	84.5361	9.09091	18.8312							82	62.5954	56.0784	25.8824
	83	100	0.847458	3.81356		83	85.567	5.84416	12.987							83	63.3588	52.549	23.9216
						84	86.5979	5.19481	11.039							84	64.1221	42.3529	24.7059
						85	87.6289	3.24675	12.3377							85	64.8855	60	26.6667
						86	88.6598	2.5974	11.6883							86	65.6489	64.7059	30.1961
						87	89.6907	2.5974	11.6883							87	66.4122	49.0196	20.7843
						88	90.7216	3.24675	10.3896							88	67.1756	69.0196	29.4118
						89	91.7526	2.5974	11.039							89	67.9389	54.902	20.7843
						90	92.7835	2.5974	12.3377							90	68.7023	51.3725	32.1569
						91	93.8144	1.94805	14.9351							91	69.4656	40.7843	23.5294
						92	94.8454	1.94805	18.1818							92	70.229	35.6863	31.7647
						93	95.8763	1.94805	15.5844							93	70.9924	37.6471	15.2941
						94	96.9072	1.94805	12.3377							94	71.7557	29.0196	14.1176
						95	97.9381	1.94805	12.987							95	72.5191	40	28.2353
						96	98.9691	2.5974	14.2857							96	73.2824	31.7647	25.8824
						97	100	3.24675	12.3377							97	74.0458	27.8431	14.5098
																98	74.8092	19.6078	12.549
																99	75.5725	21.1765	18.4314
																100	76.3359	16.8627	10.9804
																101	77.0992	15.6863	5.88235
																102	77.8626	7.45098	2.35294
																103	78.626	5.4902	3.52941
																104	79.3893	4.31373	8.23529
																105	80.1527	2.7451	11.7647
																106	80.916	2.7451	11.3725
																107	81.6794	3.13725	10.9804
																108	82.4427	0.784314	6.27451
																109	83.2061	0.392157	7.84314
																110	83.9695	0.392157	6.66667
																111	84.7328	1.96078	8.23529
																112	85.4962	1.56863	6.66667
																113	86.2595	0.392157	3.13725
																114	87.0229	1.17647	3.13725
																115	87.7863	0	4.31373
																116	88.5496	0.392157	1.56863
																117	89.313	0.784314	16.8627
																118	90.0763	0.392157	7.45098
																119	90.8397	0	10.5882
																120	91.6031	1.17647	6.27451
																121	92.3664	1.17647	4.70588
																122	93.1298	0.784314	9.01961
																123	93.8931	0.784314	6.27451
																124	94.6565	0.392157	3.92157
																125	95.4198	0.784314	8.23529
																126	96.1832	0.392157	10.9804
																127	96.9466	0.784314	9.01961
																128	97.7099	0.392157	7.45098
																129	98.4733	0.392157	3.92157
																130	99.2366	1.56863	9.01961
																131	100	1.96078	9.80392

## Sheet: Figure 3r
			1					2					3					4					5					6					7					8					9
		pixel	nomalized pixel No	normalized E-Va	normalized mChDvl		pixel	nomalized pixel No	normalized E-Va	normalized mChDvl		pixel	nomalized pixel No	normalized E-Va	normalized mChDvl		pixel	nomalized pixel No	normalized E-Va	normalized mChDvl		pixel	nomalized pixel No	normalized E-Va	normalized mChDvl		pixel	nomalized pixel No	normalized E-Va	normalized mChDvl		pixel	nomalized pixel No	normalized E-Va	normalized mChDvl		pixel	nomalized pixel No	normalized E-Va	normalized mChDvl		pixel	nomalized pixel No	normalized E-Va	normalized mChDvl
		1	1.42857	18.3673	0		1	2.27273	12.2642	0		1	1.36986	13.986	0		1	1.88679	34.7826	0		1	1.06383	13.0435	0		1	1.72414	13.5593	0		1	0.980392	5	0		1	1.96078	11.8644	0		1	1.51515	65.7895	3.08642
		2	2.85714	23.1293	0.505051		2	4.54545	19.8113	0		2	2.73973	15.3846	0		2	3.77358	17.3913	0		2	2.12766	8.69565	0		2	3.44828	5.08475	0		2	1.96078	15	0		2	3.92157	33.8983	0		2	3.0303	64.9123	4.32099
		3	4.28571	19.7279	0		3	6.81818	9.43396	0		3	4.10959	7.69231	0		3	5.66038	25	0		3	3.19149	6.52174	0		3	5.17241	8.47458	0		3	2.94118	26.6667	0		3	5.88235	55.9322	0		3	4.54545	75.4386	0
		4	5.71429	23.1293	0		4	9.09091	6.60377	0		4	5.47945	14.6853	0		4	7.54717	35.8696	0		4	4.25532	19.5652	0		4	6.89655	16.9492	0		4	3.92157	20	0		4	7.84314	18.6441	0		4	6.06061	39.4737	5.55556
		5	7.14286	26.5306	0		5	11.3636	44.3396	0		5	6.84932	7.69231	0		5	9.43396	46.7391	0		5	5.31915	21.7391	0		5	8.62069	20.339	0		5	4.90196	21.6667	0		5	9.80392	45.7627	0		5	7.57576	55.2632	0
		6	8.57143	29.932	0		6	13.6364	15.0943	0		6	8.21918	15.3846	0		6	11.3208	19.5652	0		6	6.38298	25	0		6	10.3448	33.8983	0		6	5.88235	13.3333	0		6	11.7647	38.9831	0		6	9.09091	29.8246	0
		7	10	25.1701	0		7	15.9091	20.7547	0		7	9.58904	4.8951	0		7	13.2075	20.6522	0		7	7.44681	18.4783	0		7	12.069	15.2542	0		7	6.86275	21.6667	0		7	13.7255	33.8983	0		7	10.6061	51.7544	0
		8	11.4286	31.2925	0		8	18.1818	19.8113	0		8	10.9589	4.8951	0		8	15.0943	22.8261	0		8	8.51064	11.9565	0		8	13.7931	32.2034	0		8	7.84314	38.3333	0		8	15.6863	30.5085	0		8	12.1212	40.3509	0
		9	12.8571	31.2925	0		9	20.4545	18.8679	0		9	12.3288	3.4965	0		9	16.9811	61.9565	0		9	9.57447	6.52174	0		9	15.5172	23.7288	0		9	8.82353	23.3333	0		9	17.6471	38.9831	0		9	13.6364	28.9474	0
		10	14.2857	45.5782	0		10	22.7273	8.49057	5.49451		10	13.6986	6.29371	0		10	18.8679	27.1739	0		10	10.6383	15.2174	0		10	17.2414	16.9492	0		10	9.80392	46.6667	17.2414		10	19.6078	32.2034	0		10	15.1515	39.4737	0
		11	15.7143	25.8503	0		11	25	33.0189	7.69231		11	15.0685	11.1888	18.3432		11	20.7547	45.6522	1.48148		11	11.7021	16.3043	0		11	18.9655	32.2034	0		11	10.7843	31.6667	0		11	21.5686	38.9831	3.79747		11	16.6667	21.9298	0
		12	17.1429	25.8503	0		12	27.2727	28.3019	21.978		12	16.4384	10.4895	0		12	22.6415	64.1304	2.96296		12	12.766	25	0		12	20.6897	22.0339	1.49254		12	11.7647	40	0		12	23.5294	49.1525	6.32911		12	18.1818	19.2982	0
		13	18.5714	26.5306	0		13	29.5455	47.1698	39.5604		13	17.8082	35.6643	0		13	24.5283	84.7826	7.40741		13	13.8298	27.1739	0		13	22.4138	55.9322	0		13	12.7451	50	0		13	25.4902	59.322	8.86076		13	19.697	35.9649	0
		14	20	32.6531	7.57576		14	31.8182	48.1132	17.5824		14	19.1781	36.3636	0		14	26.4151	75	28.1481		14	14.8936	22.8261	0		14	24.1379	18.6441	5.97015		14	13.7255	40	0		14	27.451	59.322	8.86076		14	21.2121	29.8246	6.17284
		15	21.4286	29.2517	15.6566		15	34.0909	71.6981	23.0769		15	20.5479	30.7692	2.36686		15	28.3019	61.9565	37.037		15	15.9574	19.5652	0		15	25.8621	28.8136	5.97015		15	14.7059	45	0		15	29.4118	81.3559	12.6582		15	22.7273	28.9474	3.08642
		16	22.8571	35.3741	16.6667		16	36.3636	56.6038	57.1429		16	21.9178	30.7692	2.36686		16	30.1887	48.913	46.6667		16	17.0213	5.43478	0		16	27.5862	40.678	2.98507		16	15.6863	76.6667	0		16	31.3725	98.3051	5.06329		16	24.2424	28.9474	0
		17	24.2857	68.0272	31.8182		17	38.6364	42.4528	41.7582		17	23.2877	18.1818	1.77515		17	32.0755	97.8261	34.0741		17	18.0851	8.69565	0		17	29.3103	52.5424	1.49254		17	16.6667	38.3333	0		17	33.3333	91.5254	18.9873		17	25.7576	64.9123	9.87654
		18	25.7143	84.3537	44.9495		18	40.9091	60.3774	82.4176		18	24.6575	43.3566	12.426		18	33.9623	94.5652	53.3333		18	19.1489	16.3043	4.2735		18	31.0345	55.9322	22.3881		18	17.6471	18.3333	0		18	35.2941	86.4407	34.1772		18	27.2727	50	12.3457
		19	27.1429	101.361	58.5859		19	43.1818	47.1698	54.9451		19	26.0274	30.0699	21.3018		19	35.8491	91.3043	72.5926		19	20.2128	16.3043	0		19	32.7586	62.7119	23.8806		19	18.6275	28.3333	0		19	37.2549	106.78	53.1646		19	28.7879	89.4737	10.4938
		20	28.5714	91.8367	54.0404		20	45.4545	39.6226	100		20	27.3973	30.0699	21.3018		20	37.7358	100	81.4815		20	21.2766	29.3478	0.854701		20	34.4828	72.8814	35.8209		20	19.6078	25	5.74713		20	39.2157	74.5763	49.3671		20	30.303	61.4035	56.1728
		21	30	82.9932	71.7172		21	47.7273	46.2264	100		21	28.7671	79.021	13.6095		21	39.6226	31.5217	59.2593		21	22.3404	18.4783	0		21	36.2069	49.1525	22.3881		21	20.5882	21.6667	11.4943		21	41.1765	86.4407	68.3544		21	31.8182	92.9825	56.1728
		22	31.4286	74.1497	89.899		22	50	50	74.7253		22	30.137	56.6434	31.9527		22	41.5094	45.6522	67.4074		22	23.4043	30.4348	5.98291		22	37.931	54.2373	52.2388		22	21.5686	23.3333	4.5977		22	43.1373	100	87.3418		22	33.3333	52.6316	82.716
		23	32.8571	59.8639	71.2121		23	52.2727	42.4528	56.044		23	31.5068	60.8392	34.9112		23	43.3962	59.7826	75.5556		23	24.4681	31.5217	5.12821		23	39.6552	96.6102	50.7463		23	22.549	66.6667	4.5977		23	45.098	86.4407	68.3544		23	34.8485	59.6491	82.0988
		24	34.2857	59.8639	71.2121		24	54.5455	44.3396	41.7582		24	32.8767	100	64.497		24	45.283	19.5652	94.0741		24	25.5319	32.6087	5.12821		24	41.3793	57.6271	61.194		24	23.5294	40	0		24	47.0588	42.3729	48.1013		24	36.3636	66.6667	82.0988
		25	35.7143	109.524	82.8283		25	56.8182	47.1698	27.4725		25	34.2466	62.2378	72.1893		25	47.1698	25	92.5926		25	26.5957	71.7391	31.6239		25	43.1034	74.5763	53.7313		25	24.5098	26.6667	12.6437		25	49.0196	45.7627	64.557		25	37.8788	64.9123	100
		26	37.1429	72.7891	66.6667		26	59.0909	50.9434	34.0659		26	35.6164	62.2378	72.1893		26	49.0566	31.5217	91.1111		26	27.6596	45.6522	10.2564		26	44.8276	91.5254	46.2687		26	25.4902	56.6667	19.5402		26	50.9804	50.8475	81.0127		26	39.3939	46.4912	79.0123
		27	38.5714	72.7891	66.6667		27	61.3636	59.434	72.5275		27	36.9863	81.1189	50.2959		27	50.9434	28.2609	74.0741		27	28.7234	88.0435	18.8034		27	46.5517	47.4576	105.97		27	26.4706	61.6667	4.5977		27	52.9412	52.5424	98.7342		27	40.9091	65.7895	65.4321
		28	40	68.0272	78.2828		28	63.6364	63.2075	50.5495		28	38.3562	46.8531	53.8462		28	52.8302	34.7826	100		28	29.7872	80.4348	21.3675		28	48.2759	47.4576	105.97		28	27.451	71.6667	31.0345		28	54.902	57.6271	64.557		28	42.4242	73.6842	69.7531
		29	41.4286	81.6327	76.7677		29	65.9091	77.3585	72.5275		29	39.726	57.3427	63.9053		29	54.717	28.2609	85.9259		29	30.8511	57.6087	16.2393		29	50	83.0508	91.0448		29	28.4314	81.6667	28.7356		29	56.8627	28.8136	84.8101		29	43.9394	40.3509	58.0247
		30	42.8571	80.2721	85.3535		30	68.1818	59.434	45.0549		30	41.0959	51.049	78.6982		30	56.6038	21.7391	72.5926		30	31.9149	86.9565	30.7692		30	51.7241	42.3729	100		30	29.4118	73.3333	34.4828		30	58.8235	57.6271	54.4304		30	45.4545	35.0877	66.6667
		31	44.2857	78.9116	94.4444		31	70.4545	73.5849	56.044		31	42.4658	56.6434	75.7396		31	58.4906	32.6087	89.6296		31	32.9787	71.7391	27.3504		31	53.4483	40.678	76.1194		31	30.3922	53.3333	45.977		31	60.7843	35.5932	83.5443		31	46.9697	46.4912	78.3951
		32	45.7143	61.9048	97.9798		32	72.7273	76.4151	28.5714		32	43.8356	36.3636	100		32	60.3774	26.087	58.5185		32	34.0426	63.0435	29.0598		32	55.1724	40.678	52.2388		32	31.3725	46.6667	34.4828		32	62.7451	25.4237	100		32	48.4848	43.8596	94.4444
		33	47.1429	67.3469	100		33	75	83.0189	10.989		33	45.2055	23.0769	74.5562		33	62.2642	31.5217	65.1852		33	35.1064	71.7391	40.1709		33	56.8966	40.678	52.2388		33	32.3529	58.3333	32.1839		33	64.7059	49.1525	69.6203		33	50	49.1228	71.6049
		34	48.5714	63.9456	91.4141		34	77.2727	84.9057	17.5824		34	46.5753	58.042	63.3136		34	64.1509	36.9565	72.5926		34	36.1702	80.4348	51.2821		34	58.6207	50.8475	92.5373		34	33.3333	45	60.9195		34	66.6667	38.9831	64.557		34	51.5152	50	71.6049
		35	50	60.5442	82.8283		35	79.5455	100	19.7802		35	47.9452	27.2727	50.8876		35	66.0377	35.8696	72.5926		35	37.234	45.6522	32.4786		35	60.3448	57.6271	83.5821		35	34.3137	73.3333	34.4828		35	68.6275	59.322	81.0127		35	53.0303	52.6316	63.5802
		36	51.4286	78.2313	82.3232		36	81.8182	78.3019	0		36	49.3151	41.958	53.8462		36	67.9245	28.2609	50.3704		36	38.2979	54.3478	54.7009		36	62.069	74.5763	49.2537		36	35.2941	71.6667	24.1379		36	70.5882	52.5424	64.557		36	54.5455	56.1404	56.1728
		37	52.8571	59.8639	74.7475		37	84.0909	65.0943	0		37	50.6849	33.5664	96.4497		37	69.8113	21.7391	28.8889		37	39.3617	53.2609	56.4103		37	63.7931	54.2373	40.2985		37	36.2745	100	35.6322		37	72.549	100	39.2405		37	56.0606	62.2807	75.3086
		38	54.2857	61.2245	86.3636		38	86.3636	46.2264	0		38	52.0548	33.5664	96.4497		38	71.6981	33.6957	33.3333		38	40.4255	52.1739	58.9744		38	65.5172	100	38.806		38	37.2549	45	40.2299		38	74.5098	93.2203	39.2405		38	57.5758	75.4386	58.0247
		39	55.7143	63.2653	98.4848		39	88.6364	17.9245	0		39	53.4247	19.5804	36.6864		39	73.5849	51.087	60		39	41.4894	48.913	64.1026		39	67.2414	49.1525	29.8507		39	38.2353	78.3333	65.5172		39	76.4706	100	16.4557		39	59.0909	84.2105	67.9012
		40	57.1429	60.5442	78.7879		40	90.9091	36.7925	0		40	54.7945	32.1678	80.4734		40	75.4717	56.5217	45.1852		40	42.5532	25	52.9915		40	68.9655	66.1017	34.3284		40	39.2157	78.3333	65.5172		40	78.4314	91.5254	26.5823		40	60.6061	100	58.642
		41	58.5714	63.2653	94.9495		41	93.1818	34.9057	0		41	56.1644	30.0699	57.9882		41	77.3585	63.0435	31.1111		41	43.617	30.4348	48.7179		41	70.6897	35.5932	16.4179		41	40.1961	31.6667	25.2874		41	80.3922	40.678	34.1772		41	62.1212	88.5965	27.7778
		42	60	63.2653	81.8182		42	95.4545	33.0189	1.0989		42	57.5342	40.5594	46.7456		42	79.2453	67.3913	22.963		42	44.6809	35.8696	46.1538		42	72.4138	57.6271	20.8955		42	41.1765	45	41.3793		42	82.3529	64.4068	25.3165		42	63.6364	80.7018	40.7407
		43	61.4286	63.2653	69.1919		43	97.7273	23.5849	0		43	58.9041	38.4615	32.5444		43	81.1321	14.1304	10.3704		43	45.7447	42.3913	44.4444		43	74.1379	32.2034	7.46269		43	42.1569	51.6667	52.8736		43	84.3137	5.08475	0		43	65.1515	73.6842	54.321
		44	62.8571	34.6939	71.7172		44	100	10.3774	0		44	60.274	41.958	46.1538		44	83.0189	18.4783	5.18519		44	46.8085	29.3478	48.7179		44	75.8621	32.2034	7.46269		44	43.1373	55	45.977		44	86.2745	5.08475	0		44	66.6667	75.4386	47.5309
		45	64.2857	55.7823	84.8485							45	61.6438	63.6364	13.6095		45	84.9057	23.913	0		45	47.8723	36.9565	71.7949		45	77.5862	57.6271	0		45	44.1176	40	83.908		45	88.2353	44.0678	0		45	68.1818	94.7368	30.2469
		46	65.7143	67.3469	81.3131							46	63.0137	44.7552	28.4024		46	86.7925	15.2174	0		46	48.9362	26.087	67.5214		46	79.3103	42.3729	14.9254		46	45.098	66.6667	75.8621		46	90.1961	20.339	0		46	69.697	84.2105	12.963
		47	67.1429	79.5918	78.2828							47	64.3836	44.7552	28.4024		47	88.6792	10.8696	0		47	50	16.3043	64.1026		47	81.0345	33.8983	1.49254		47	46.0784	63.3333	60.9195		47	92.1569	11.8644	0		47	71.2121	55.2632	8.02469
		48	68.5714	79.5918	70.202							48	65.7534	58.042	23.6686		48	90.566	6.52174	0		48	51.0638	48.913	58.9744		48	82.7586	27.1186	0		48	47.0588	31.6667	55.1724		48	94.1176	8.47458	0		48	72.7273	67.5439	13.5802
		49	70	72.1088	42.4242							49	67.1233	84.6154	34.9112		49	92.4528	20.6522	0		49	52.1277	25	56.4103		49	84.4828	22.0339	0		49	48.0392	18.3333	54.023		49	96.0784	5.08475	0		49	74.2424	58.7719	8.02469
		50	71.4286	93.8776	54.5455							50	68.4932	84.6154	34.9112		50	94.3396	26.087	0		50	53.1915	31.5217	58.1197		50	86.2069	49.1525	0		50	49.0196	18.3333	54.023		50	98.0392	3.38983	0		50	75.7576	50.8772	3.08642
		51	72.8571	81.6327	45.9596							51	69.863	62.9371	23.0769		51	96.2264	29.3478	0		51	54.2553	39.1304	59.8291		51	87.931	45.7627	0		51	50	8.33333	91.954		51	100	8.47458	0		51	77.2727	60.5263	3.08642
		52	74.2857	64.6259	23.2323							52	71.2329	72.7273	19.5266		52	98.1132	32.6087	0		52	55.3191	28.2609	100		52	89.6552	27.1186	0		52	50.9804	0	65.5172							52	78.7879	61.4035	0
		53	75.7143	56.4626	18.1818							53	72.6027	40.5594	10.6509		53	100	67.3913	8.14815		53	56.383	20.6522	53.8462		53	91.3793	10.1695	0		53	51.9608	21.6667	87.3563							53	80.303	31.5789	8.02469
		54	77.1429	44.2177	0							54	73.9726	50.3497	14.7929							54	57.4468	36.9565	70.0855		54	93.1034	11.8644	0		54	52.9412	0	83.908							54	81.8182	32.4561	0
		55	78.5714	33.3333	1.0101							55	75.3425	42.6573	17.7515							55	58.5106	25	54.7009		55	94.8276	15.2542	1.49254		55	53.9216	10	96.5517							55	83.3333	36.8421	0
		56	80	23.1293	2.0202							56	76.7123	39.1608	30.1775							56	59.5745	29.3478	79.4872		56	96.5517	22.0339	1.49254		56	54.902	3.33333	87.3563							56	84.8485	41.2281	0
		57	81.4286	30.6122	1.51515							57	78.0822	39.1608	30.1775							57	60.6383	22.8261	56.4103		57	98.2759	30.5085	1.49254		57	55.8824	15	100							57	86.3636	43.8596	0
		58	82.8571	30.6122	1.51515							58	79.4521	33.5664	14.7929							58	61.7021	13.0435	71.7949		58	100	10.1695	0		58	56.8627	16.6667	72.4138							58	87.8788	84.2105	0.617284
		59	84.2857	21.7687	0							59	80.8219	34.2657	7.69231							59	62.766	22.8261	61.5385							59	57.8431	18.3333	74.7126							59	89.3939	44.7368	0
		60	85.7143	18.3673	0							60	82.1918	43.3566	0							60	63.8298	20.6522	57.265							60	58.8235	15	94.2529							60	90.9091	22.807	0
		61	87.1429	19.7279	4.0404							61	83.5616	25.8741	0							61	64.8936	35.8696	55.5556							61	59.8039	33.3333	75.8621							61	92.4242	43.8596	0
		62	88.5714	21.0884	8.58586							62	84.9315	39.1608	1.18343							62	65.9574	26.087	81.1966							62	60.7843	70	55.1724							62	93.9394	38.5965	0
		63	90	16.3265	0							63	86.3014	53.8462	4.14201							63	67.0213	45.6522	87.1795							63	61.7647	78.3333	35.6322							63	95.4545	34.2105	0
		64	91.4286	22.449	0							64	87.6712	16.7832	0							64	68.0851	36.9565	67.5214							64	62.7451	78.3333	35.6322							64	96.9697	64.0351	0
		65	92.8571	16.3265	1.51515							65	89.0411	29.3706	0							65	69.1489	53.2609	77.7778							65	63.7255	80	37.931							65	98.4848	51.7544	0
		66	94.2857	32.6531	0							66	90.411	33.5664	0							66	70.2128	56.5217	89.7436							66	64.7059	21.6667	29.8851							66	100	36.8421	0
		67	95.7143	14.966	0							67	91.7808	32.8671	0							67	71.2766	69.5652	55.5556							67	65.6863	21.6667	29.8851
		68	97.1429	14.966	0							68	93.1507	23.0769	0							68	72.3404	77.1739	58.1197							68	66.6667	35	24.1379
		69	98.5714	15.6463	0							69	94.5205	32.1678	0							69	73.4043	79.3478	67.5214							69	67.6471	71.6667	12.6437
		70	100	21.7687	0							70	95.8904	1.3986	0							70	74.4681	86.9565	82.0513							70	68.6275	25	6.89655
												71	97.2603	18.8811	0							71	75.5319	89.1304	48.7179							71	69.6078	3.33333	25.2874
												72	98.6301	35.6643	0							72	76.5957	100	53.8462							72	70.5882	8.33333	0
												73	100	23.7762	0							73	77.6596	84.7826	19.6581							73	71.5686	15	12.6437
																						74	78.7234	94.5652	16.2393							74	72.549	6.66667	19.5402
																						75	79.7872	68.4783	8.54701							75	73.5294	0	26.4368
																						76	80.8511	65.2174	12.8205							76	74.5098	15	0
																						77	81.9149	48.913	0.854701							77	75.4902	16.6667	1.14943
																						78	82.9787	60.8696	0							78	76.4706	18.3333	3.44828
																						79	84.0426	56.5217	0							79	77.451	18.3333	3.44828
																						80	85.1064	45.6522	2.5641							80	78.4314	36.6667	5.74713
																						81	86.1702	52.1739	3.4188							81	79.4118	20	14.9425
																						82	87.234	43.4783	0							82	80.3922	16.6667	11.4943
																						83	88.2979	35.8696	0							83	81.3725	10	5.74713
																						84	89.3617	42.3913	5.12821							84	82.3529	5	0
																						85	90.4255	29.3478	0							85	83.3333	0	0
																						86	91.4894	40.2174	0							86	84.3137	0	0
																						87	92.5532	36.9565	0							87	85.2941	0	0
																						88	93.617	21.7391	0							88	86.2745	0	0
																						89	94.6809	21.7391	7.69231							89	87.2549	0	0
																						90	95.7447	35.8696	1.7094							90	88.2353	0	0
																						91	96.8085	16.3043	0							91	89.2157	0	0
																						92	97.8723	20.6522	0							92	90.1961	0	0
																						93	98.9362	52.1739	0							93	91.1765	0	0
																						94	100	27.1739	0							94	92.1569	0	0
																																95	93.1373	0	0
																																96	94.1176	1.66667	0
																																97	95.098	0	0
																																98	96.0784	0	0
																																99	97.0588	0	0
																																100	98.0392	0	0
																																101	99.0196	3.33333	0
																																102	100	0	0

## Sheet: Figure 3s
	pixel	nomalized pixel No	E-Va	mChDvl		pixel	nomalized pixel No	E-Va	mChDvl		pixel	nomalized pixel No	E-Va	mChDvl		pixel	nomalized pixel No	E-Va	mChDvl		pixel	nomalized pixel No	E-Va	mChDvl
	1	1.0101	48.6842	42.1053		2	1.75439	52.5862	1.72414		2	0.925926	36.6071	7.14286		2	0.877193	34.375	14.8438		2	0.917431	45.7627	22.0339
	2	2.0202	43.4211	28.9474		3	3.50877	52.5862	3.44828		3	1.85185	53.5714	0		3	1.75439	33.5938	3.125		3	1.83486	62.7119	28.8136
	3	3.0303	63.1579	65.7895		4	5.26316	50	13.7931		4	2.77778	57.1429	12.5		4	2.63158	28.125	14.8438		4	2.75229	79.661	11.8644
	4	4.0404	61.8421	59.2105		5	7.01754	48.2759	24.1379		5	3.7037	52.6786	0		5	3.50877	34.375	23.4375		5	3.66972	61.0169	8.47458
	5	5.05051	61.8421	52.6316		6	8.77193	62.069	16.3793		6	4.62963	48.2143	3.57143		6	4.38596	35.9375	18.75		6	4.58716	61.0169	10.1695
	6	6.06061	68.4211	27.6316		7	10.5263	47.4138	13.7931		7	5.55556	41.0714	0		7	5.26316	38.2812	14.8438		7	5.50459	61.0169	0
	7	7.07071	71.0526	31.5789		8	12.2807	63.7931	31.0345		8	6.48148	49.1071	4.46429		8	6.14035	32.0312	21.0938		8	6.42202	72.8814	18.6441
	8	8.08081	52.6316	59.2105		9	14.0351	63.7931	31.0345		9	7.40741	41.9643	2.67857		9	7.01754	31.25	17.9688		9	7.33945	49.1525	25.4237
	9	9.09091	64.4737	44.7368		10	15.7895	53.4483	19.8276		10	8.33333	41.0714	27.6786		10	7.89474	30.4688	15.625		10	8.25688	66.1017	8.47458
	10	10.101	53.9474	36.8421		11	17.5439	56.8966	18.1034		11	9.25926	45.5357	12.5		11	8.77193	28.9062	35.1562		11	9.17431	76.2712	18.6441
	11	11.1111	43.4211	28.9474		12	19.2982	48.2759	15.5172		12	10.1852	43.75	7.14286		12	9.64912	28.125	26.5625		12	10.0917	71.1864	13.5593
	12	12.1212	46.0526	48.6842		13	21.0526	62.931	49.1379		13	11.1111	51.7857	5.35714		13	10.5263	28.125	18.75		13	11.0092	28.8136	6.77966
	13	13.1313	64.4737	36.8421		14	22.807	69.8276	37.069		14	12.037	57.1429	21.4286		14	11.4035	29.6875	34.375		14	11.9266	40.678	0
	14	14.1414	48.6842	68.4211		15	24.5614	69.8276	43.1034		15	12.963	76.7857	8.03571		15	12.2807	28.125	29.6875		15	12.844	47.4576	32.2034
	15	15.1515	59.2105	48.6842		16	26.3158	69.8276	49.1379		16	13.8889	67.8571	29.4643		16	13.1579	25.7812	19.5312		16	13.7615	45.7627	37.2881
	16	16.1616	52.6316	42.1053		17	28.0702	94.8276	57.7586		17	14.8148	85.7143	33.0357		17	14.0351	23.4375	10.1562		17	14.6789	37.2881	8.47458
	17	17.1717	46.0526	36.8421		18	29.8246	95.6897	69.8276		18	15.7407	76.7857	8.03571		18	14.9123	25	26.5625		18	15.5963	42.3729	13.5593
	18	18.1818	63.1579	30.2632		19	31.5789	93.9655	62.931		19	16.6667	67.8571	29.4643		19	15.7895	39.8438	26.5625		19	16.5138	40.678	6.77966
	19	19.1919	65.7895	43.4211		20	33.3333	87.069	71.5517		20	17.5926	85.7143	33.0357		20	16.6667	39.8438	27.3438		20	17.4312	42.3729	37.2881
	20	20.202	48.6842	34.2105		21	35.0877	73.2759	77.5862		21	18.5185	79.4643	37.5		21	17.5439	47.6562	14.0625		21	18.3486	42.3729	11.8644
	21	21.2121	68.4211	39.4737		22	36.8421	76.7241	56.0345		22	19.4444	86.6071	54.4643		22	18.4211	47.6562	14.0625		22	19.2661	35.5932	23.7288
	22	22.2222	57.8947	30.2632		23	38.5965	81.0345	35.3448		23	20.3704	89.2857	58.0357		23	19.2982	51.5625	56.25		23	20.1835	57.6271	27.1186
	23	23.2323	47.3684	22.3684		24	40.3509	81.8966	42.2414		24	21.2963	100	57.1429		24	20.1754	77.3438	31.25		24	21.1009	55.9322	37.2881
	24	24.2424	76.3158	30.2632		25	42.1053	79.3103	53.4483		25	22.2222	96.4286	39.2857		25	21.0526	69.5312	39.0625		25	22.0183	30.5085	28.8136
	25	25.2525	76.3158	30.2632		26	43.8596	68.9655	53.4483		26	23.1481	62.5	73.2143		26	21.9298	62.5	37.5		26	22.9358	71.1864	32.2034
	26	26.2626	44.7368	32.8947		27	45.614	80.1724	43.1034		27	24.0741	71.4286	70.5357		27	22.807	55.4688	36.7188		27	23.8532	52.5424	13.5593
	27	27.2727	69.7368	31.5789		28	47.3684	76.7241	46.5517		28	25	64.2857	53.5714		28	23.6842	37.5	10.1562		28	24.7706	50.8475	28.8136
	28	28.2828	100	43.4211		29	49.1228	74.1379	50.8621		29	25.9259	74.1071	48.2143		29	24.5614	50.7812	28.125		29	25.6881	45.7627	57.6271
	29	29.2929	68.4211	39.4737		30	50.8772	75	55.1724		30	26.8519	70.5357	31.25		30	25.4386	39.8438	32.8125		30	26.6055	47.4576	37.2881
	30	30.303	63.1579	40.7895		31	52.6316	65.5172	53.4483		31	27.7778	69.6429	42.8571		31	26.3158	38.2812	37.5		31	27.5229	40.678	44.0678
	31	31.3131	57.8947	43.4211		32	54.386	85.3448	47.4138		32	28.7037	60.7143	58.0357		32	27.193	37.5	42.1875		32	28.4404	61.0169	50.8475
	32	32.3232	60.5263	57.8947		33	56.1404	70.6897	69.8276		33	29.6296	67.8571	50.8929		33	28.0702	35.9375	54.6875		33	29.3578	67.7966	44.0678
	33	33.3333	67.1053	52.6316		34	57.8947	79.3103	34.4828		34	30.5556	70.5357	31.25		34	28.9474	31.25	33.5938		34	30.2752	66.1017	37.2881
	34	34.3434	68.4211	51.3158		35	59.6491	76.7241	36.2069		35	31.4815	55.3571	32.1429		35	29.8246	45.3125	40.625		35	31.1927	64.4068	35.5932
	35	35.3535	50	92.1053		36	61.4035	75	37.931		36	32.4074	53.5714	36.6071		36	30.7018	36.7188	36.7188		36	32.1101	89.8305	64.4068
	36	36.3636	55.2632	80.2632		37	63.1579	74.1379	47.4138		37	33.3333	58.9286	56.25		37	31.5789	28.9062	32.8125		37	33.0275	74.5763	54.2373
	37	37.3737	60.5263	68.4211		38	64.9123	80.1724	54.3103		38	34.2593	62.5	10.7143		38	32.4561	31.25	22.6562		38	33.945	45.7627	54.2373
	38	38.3838	63.1579	63.1579		39	66.6667	68.9655	66.3793		39	35.1852	53.5714	8.92857		39	33.3333	32.8125	34.375		39	34.8624	64.4068	54.2373
	39	39.3939	89.4737	44.7368		40	68.4211	83.6207	76.7241		40	36.1111	56.25	4.46429		40	34.2105	31.25	49.2188		40	35.7798	76.2712	76.2712
	40	40.404	64.4737	61.8421		41	70.1754	78.4483	50		41	37.037	52.6786	32.1429		41	35.0877	30.4688	53.125		41	36.6972	35.5932	42.3729
	41	41.4141	55.2632	50		42	71.9298	88.7931	62.069		42	37.963	50	18.75		42	35.9649	30.4688	57.8125		42	37.6147	54.2373	77.9661
	42	42.4242	47.3684	38.1579		43	73.6842	100	75		43	38.8889	52.6786	10.7143		43	36.8421	40.625	64.0625		43	38.5321	72.8814	71.1864
	43	43.4343	69.7368	48.6842		44	75.4386	68.1034	56.8966		44	39.8148	62.5	13.3929		44	37.7193	61.7188	81.25		44	39.4495	76.2712	71.1864
	44	44.4444	56.5789	61.8421		45	77.193	75	59.4828		45	40.7407	64.2857	51.7857		45	38.5965	65.625	29.6875		45	40.367	59.322	66.1017
	45	45.4545	68.4211	44.7368		46	78.9474	78.4483	57.7586		46	41.6667	61.6071	24.1071		46	39.4737	55.4688	31.25		46	41.2844	76.2712	72.8814
	46	46.4646	76.3158	28.9474		47	80.7018	84.4828	49.1379		47	42.5926	55.3571	29.4643		47	40.3509	46.0938	33.5938		47	42.2018	76.2712	55.9322
	47	47.4747	72.3684	18.4211		48	82.4561	70.6897	31.0345		48	43.5185	61.6071	34.8214		48	41.2281	46.0938	33.5938		48	43.1193	84.7458	72.8814
	48	48.4848	69.7368	9.21053		49	84.2105	57.7586	13.7931		49	44.4444	60.7143	53.5714		49	42.1053	48.4375	49.2188		49	44.0367	76.2712	61.0169
	49	49.4949	80.2632	38.1579		50	85.9649	74.1379	29.3103		50	45.3704	67.8571	32.1429		50	42.9825	58.5938	42.9688		50	44.9541	57.6271	94.9153
	50	50.5051	72.3684	21.0526		51	87.7193	62.931	11.2069		51	46.2963	67.8571	32.1429		51	43.8596	54.6875	33.5938		51	45.8716	59.322	42.3729
	51	51.5152	73.6842	19.7368		52	89.4737	54.3103	20.6897		52	47.2222	65.1786	44.6429		52	44.7368	52.3438	35.1562		52	46.789	81.3559	74.5763
	52	52.5253	75	22.3684		53	91.2281	61.2069	15.5172		53	48.1481	62.5	58.9286		53	45.614	50.7812	36.7188		53	47.7064	96.6102	40.678
	53	53.5354	77.6316	25		54	92.9825	62.069	18.9655		54	49.0741	58.0357	19.6429		54	46.4912	52.3438	54.6875		54	48.6239	50.8475	57.6271
	54	54.5455	77.6316	25		55	94.7368	81.0345	11.2069		55	50	53.5714	14.2857		55	47.3684	50	35.9375		55	49.5413	59.322	66.1017
	55	55.5556	59.2105	40.7895		56	96.4912	60.3448	16.3793		56	50.9259	59.8214	8.03571		56	48.2456	45.3125	38.2812		56	50.4587	77.9661	69.4915
	56	56.5657	61.8421	30.2632		57	98.2456	77.5862	11.2069		57	51.8519	48.2143	35.7143		57	49.1228	41.4062	41.4062		57	51.3761	74.5763	52.5424
	57	57.5758	60.5263	9.21053		58	100	75	27.5862		58	52.7778	49.1071	41.0714		58	50	36.7188	47.6562		58	52.2936	69.4915	49.1525
	58	58.5859	61.8421	0							59	53.7037	57.1429	20.5357		59	50.8772	42.9688	37.5		59	53.211	76.2712	54.2373
	59	59.596	63.1579	50							60	54.6296	43.75	32.1429		60	51.7544	44.5312	42.9688		60	54.1284	55.9322	57.6271
	60	60.6061	67.1053	44.7368							61	55.5556	56.25	35.7143		61	52.6316	46.0938	49.2188		61	55.0459	76.2712	59.322
	61	61.6162	63.1579	42.1053							62	56.4815	48.2143	0		62	53.5088	47.6562	27.3438		62	55.9633	62.7119	35.5932
	62	62.6263	61.8421	34.2105							63	57.4074	59.8214	7.14286		63	54.386	54.6875	8.59375		63	56.8807	64.4068	20.339
	63	63.6364	61.8421	26.3158							64	58.3333	54.4643	25.8929		64	55.2632	46.0938	43.75		64	57.7982	74.5763	37.2881
	64	64.6465	56.5789	51.3158							65	59.2593	56.25	25.8929		65	56.1404	41.4062	32.0312		65	58.7156	81.3559	66.1017
	65	65.6566	68.4211	36.8421							66	60.1852	50.8929	0		66	57.0175	37.5	21.0938		66	59.633	74.5763	44.0678
	66	66.6667	60.5263	22.3684							67	61.1111	55.3571	28.5714		67	57.8947	48.4375	4.6875		67	60.5505	52.5424	79.661
	67	67.6768	53.9474	27.6316							68	62.037	71.4286	25		68	58.7719	42.1875	30.4688		68	61.4679	59.322	40.678
	68	68.6869	75	47.3684							69	62.963	79.4643	34.8214		69	59.6491	34.375	46.875		69	62.3853	74.5763	74.5763
	69	69.697	43.4211	27.6316							70	63.8889	65.1786	50.8929		70	60.5263	34.375	63.2812		70	63.3028	69.4915	47.4576
	70	70.7071	50	27.6316							71	64.8148	52.6786	33.9286		71	61.4035	29.6875	40.625		71	64.2202	72.8814	69.4915
	71	71.7172	57.8947	28.9474							72	65.7407	66.9643	14.2857		72	62.2807	41.4062	100		72	65.1376	74.5763	72.8814
	72	72.7273	57.8947	30.2632							73	66.6667	57.1429	24.1071		73	63.1579	32.0312	38.2812		73	66.055	91.5254	89.8305
	73	73.7374	48.6842	26.3158							74	67.5926	44.6429	25.8929		74	64.0351	34.375	38.2812		74	66.9725	71.1864	76.2712
	74	74.7475	63.1579	48.6842							75	68.5185	53.5714	14.2857		75	64.9123	42.9688	30.4688		75	67.8899	81.3559	74.5763
	75	75.7576	61.8421	35.5263							76	69.4444	54.4643	6.25		76	65.7895	43.75	46.0938		76	68.8073	67.7966	79.661
	76	76.7677	60.5263	23.6842							77	70.3704	48.2143	25		77	66.6667	46.0938	37.5		77	69.7248	67.7966	72.8814
	77	77.7778	50	52.6316							78	71.2963	41.0714	0		78	67.5439	49.2188	28.9062		78	70.6422	100	66.1017
	78	78.7879	65.7895	50							79	72.2222	55.3571	39.2857		79	68.4211	49.2188	44.5312		79	71.5596	69.4915	79.661
	79	79.798	57.8947	44.7368							80	73.1481	53.5714	35.7143		80	69.2982	54.6875	17.1875		80	72.4771	52.5424	74.5763
	80	80.8081	51.3158	39.4737							81	74.0741	53.5714	29.4643		81	70.1754	49.2188	60.9375		81	73.3945	86.4407	86.4407
	81	81.8182	56.5789	28.9474							82	75	72.3214	35.7143		82	71.0526	49.2188	50		82	74.3119	83.0508	71.1864
	82	82.8283	65.7895	23.6842							83	75.9259	70.5357	66.9643		83	71.9298	49.2188	39.0625		83	75.2294	81.3559	86.4407
	83	83.8384	57.8947	57.8947							84	76.8519	72.3214	41.0714		84	72.807	38.2812	50		84	76.1468	74.5763	71.1864
	84	84.8485	65.7895	47.3684							85	77.7778	73.2143	27.6786		85	73.6842	47.6562	51.5625		85	77.0642	74.5763	47.4576
	85	85.8586	73.6842	36.8421							86	78.7037	80.3571	41.9643		86	74.5614	34.375	26.5625		86	77.9817	74.5763	47.4576
	86	86.8687	46.0526	34.2105							87	79.6296	93.75	16.0714		87	75.4386	38.2812	26.5625		87	78.8991	76.2712	33.8983
	87	87.8788	52.6316	38.1579							88	80.5556	76.7857	13.3929		88	76.3158	42.1875	27.3438		88	79.8165	72.8814	38.9831
	88	88.8889	59.2105	43.4211							89	81.4815	59.8214	2.67857		89	77.193	50.7812	35.1562		89	80.7339	57.6271	30.5085
	89	89.899	46.0526	42.1053							90	82.4074	61.6071	3.57143		90	78.0702	62.5	40.625		90	81.6514	71.1864	42.3729
	90	90.9091	57.8947	28.9474							91	83.3333	77.6786	17.8571		91	78.9474	47.6562	52.3438		91	82.5688	57.6271	33.8983
	91	91.9192	64.4737	27.6316							92	84.2593	64.2857	10.7143		92	79.8246	54.6875	40.625		92	83.4862	76.2712	32.2034
	92	92.9293	72.3684	26.3158							93	85.1852	64.2857	10.7143		93	80.7018	43.75	27.3438		93	84.4037	64.4068	76.2712
	93	93.9394	64.4737	39.4737							94	86.1111	75.8929	7.14286		94	81.5789	40.625	41.4062		94	85.3211	59.322	67.7966
	94	94.9495	59.2105	25							95	87.037	61.6071	1.78571		95	82.4561	46.875	7.8125		95	86.2385	74.5763	32.2034
	95	95.9596	55.2632	11.8421							96	87.963	61.6071	35.7143		96	83.3333	42.9688	13.2812		96	87.156	47.4576	32.2034
	96	96.9697	52.6316	22.3684							97	88.8889	50	8.92857		97	84.2105	44.5312	18.75		97	88.0734	66.1017	23.7288
	97	97.9798	76.3158	22.3684							98	89.8148	36.6071	16.0714		98	85.0877	33.5938	24.2188		98	88.9908	76.2712	5.08475
	98	98.9899	63.1579	32.8947							99	90.7407	45.5357	14.2857		99	85.9649	30.4688	13.2812		99	89.9083	71.1864	13.5593
	99	100	50	43.4211							100	91.6667	40.1786	3.57143		100	86.8421	22.6562	11.7188		100	90.8257	71.1864	18.6441
											101	92.5926	51.7857	0		101	87.7193	25	0		101	91.7431	72.8814	3.38983
											102	93.5185	42.8571	7.14286		102	88.5965	26.5625	15.625		102	92.6606	54.2373	0
											103	94.4444	44.6429	0		103	89.4737	28.9062	32.0312		103	93.578	74.5763	0
											104	95.3704	38.3929	0		104	90.3509	28.9062	7.03125		104	94.4954	55.9322	20.339
											105	96.2963	24.1071	4.46429		105	91.2281	22.6562	0		105	95.4128	67.7966	13.5593
											106	97.2222	25.8929	6.25		106	92.1053	32.0312	5.46875		106	96.3303	83.0508	44.0678
											107	98.1481	26.7857	11.6071		107	92.9825	25	0		107	97.2477	66.1017	89.8305
											108	99.0741	26.7857	11.6071		108	93.8596	28.125	22.6562		108	98.1651	49.1525	11.8644
											109	100	30.3571	2.67857		109	94.7368	29.6875	0		109	99.0826	61.0169	52.5424
																110	95.614	41.4062	6.25		110	100	72.8814	38.9831
																111	96.4912	33.5938	0.78125
																112	97.3684	29.6875	2.34375
																113	98.2456	23.4375	9.375
																114	99.1228	24.2188	3.125
																115	100	19.5312	18.75

[truncated: 11 more sheets: Figure 3t, Figure 3— figure supplement 2b, Figure 3— figure supplement 3, Figure 6f, Figure 7j upper, Figure 7j lower, Figure 7— figure supplement 1b, Figure 7— figure supplement 2a, Figure 7— figure supplement 3b, Figure 7— figure supplement 4b, Sheet14]
