# Supplementary figures and images for: Prickle and Ror modulate Dishevelled-Vangl interaction to regulate non-canonical Wnt signaling during convergent extension
Source: eLife journal article supplement (doi:10.7554/elife.91199), 2023-09-27

|                |   |   |   |   |   |   |
|----------------|---|---|---|---|---|---|
| EGFP-Vangl2    | - | + | - | - | + | - |
| EGFP-Vangl2-RH | - | - | + | - | - | + |
| flag-Pk        | + | + | + | + | + | + |

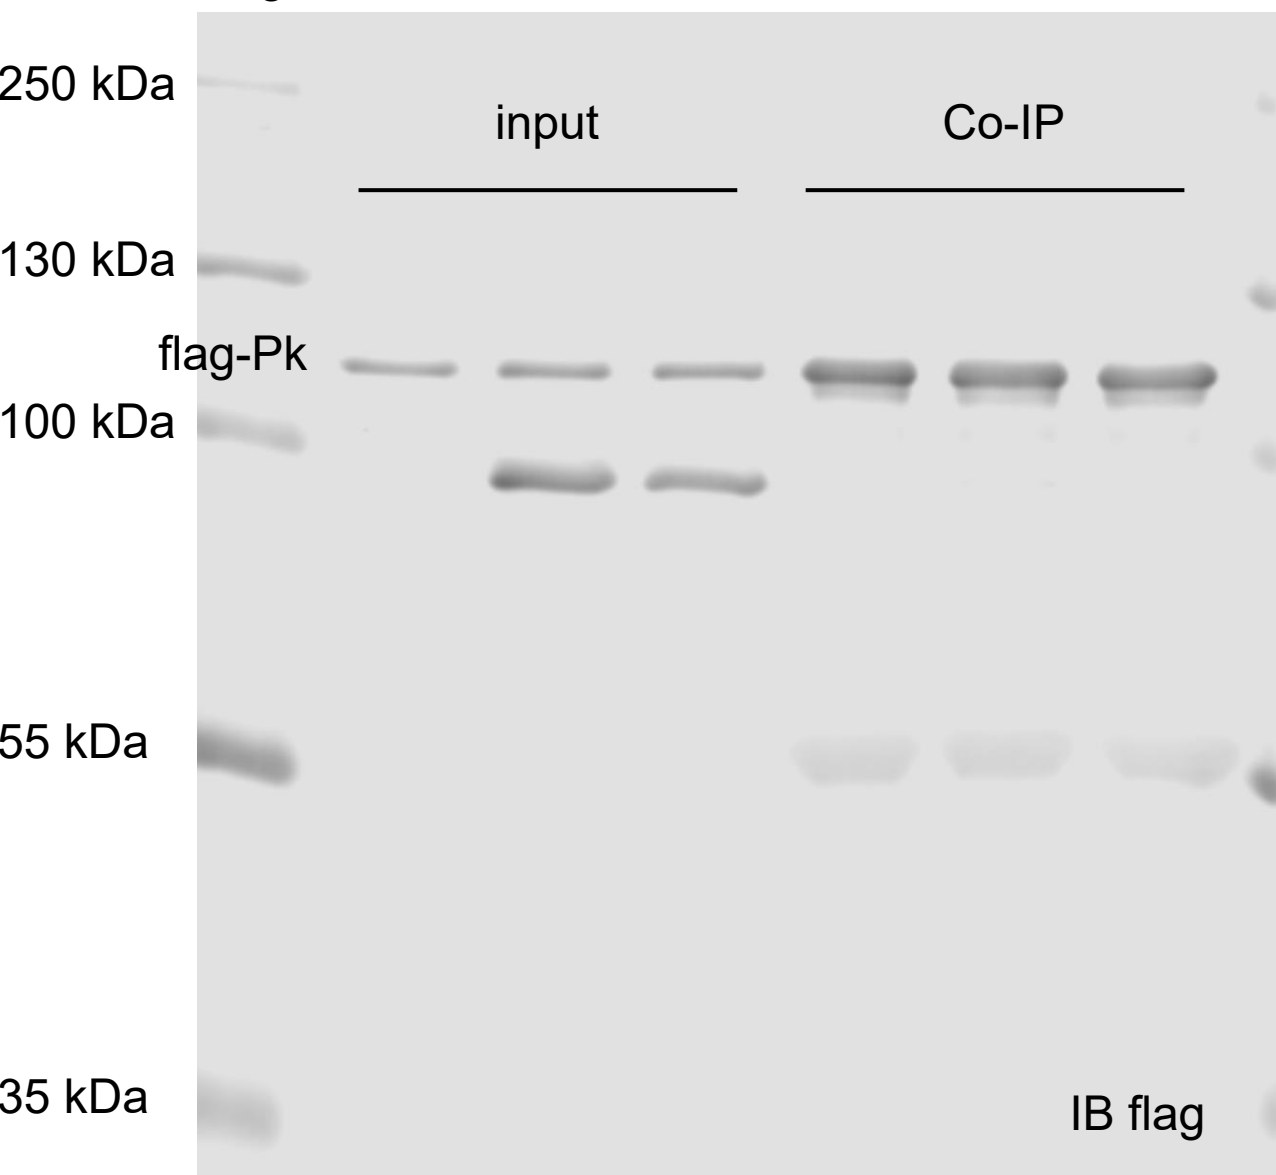

|                |   |   |   |   |   |   |
|----------------|---|---|---|---|---|---|
| EGFP-Vangl2    | - | + | - | - | + | - |
| EGFP-Vangl2-RH | - | - | + | - | - | + |
| flag-Pk        | + | + | + | + | + | + |

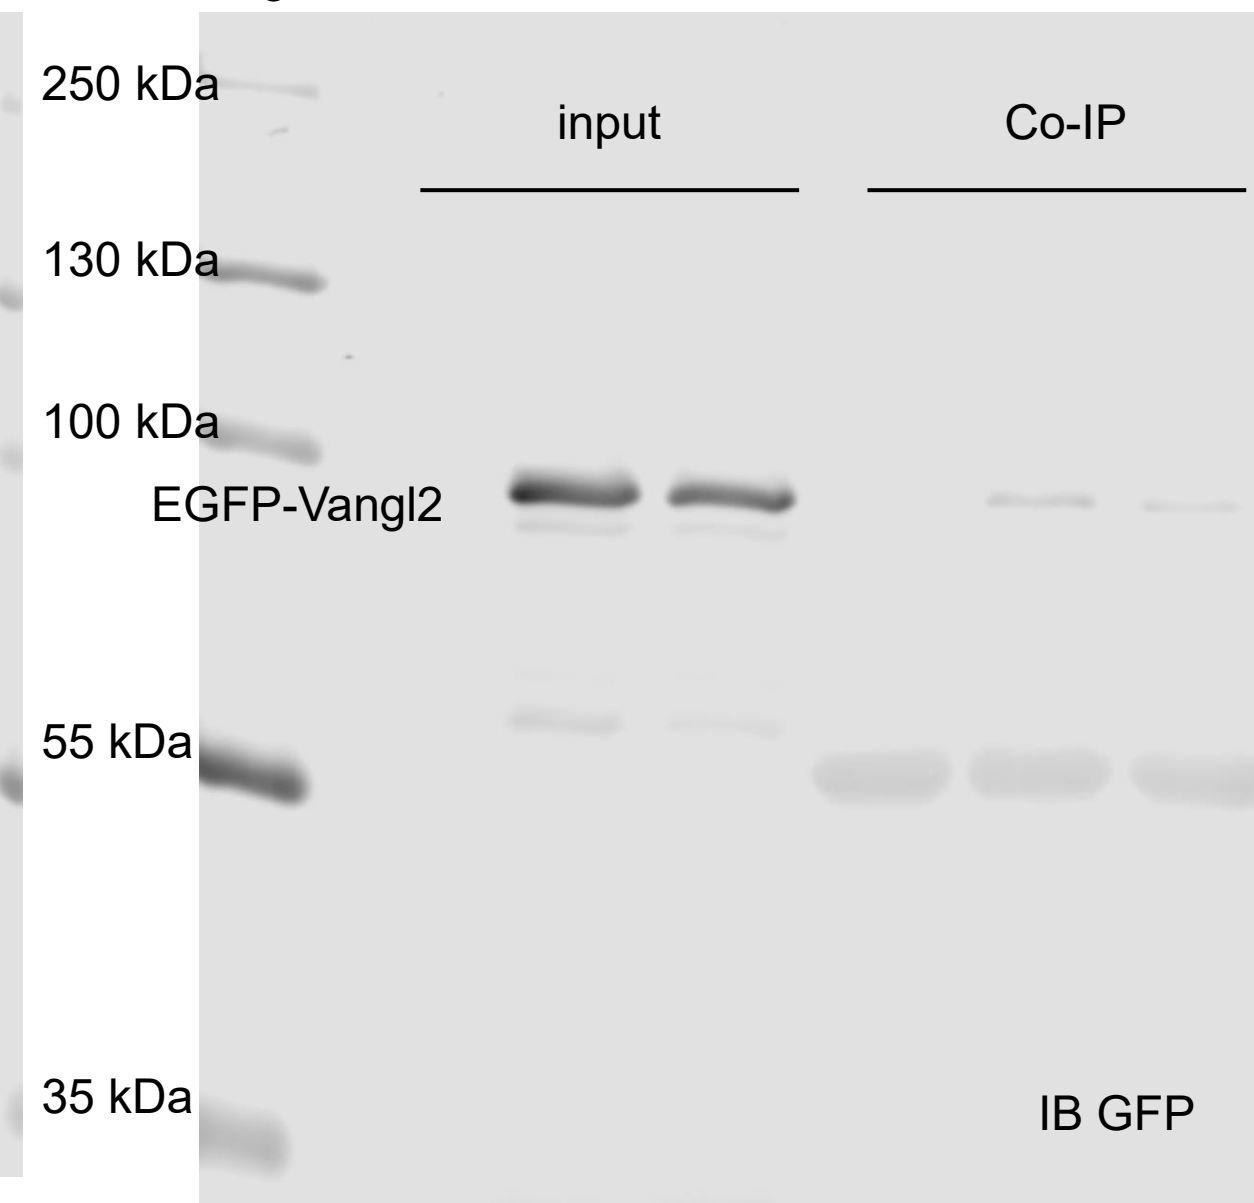

Supplement: fig2-data1 [file Figure 2g-source data 1.pdf › Figure 2g-source data 1.pdf]

Fig 2 Sup 1 a

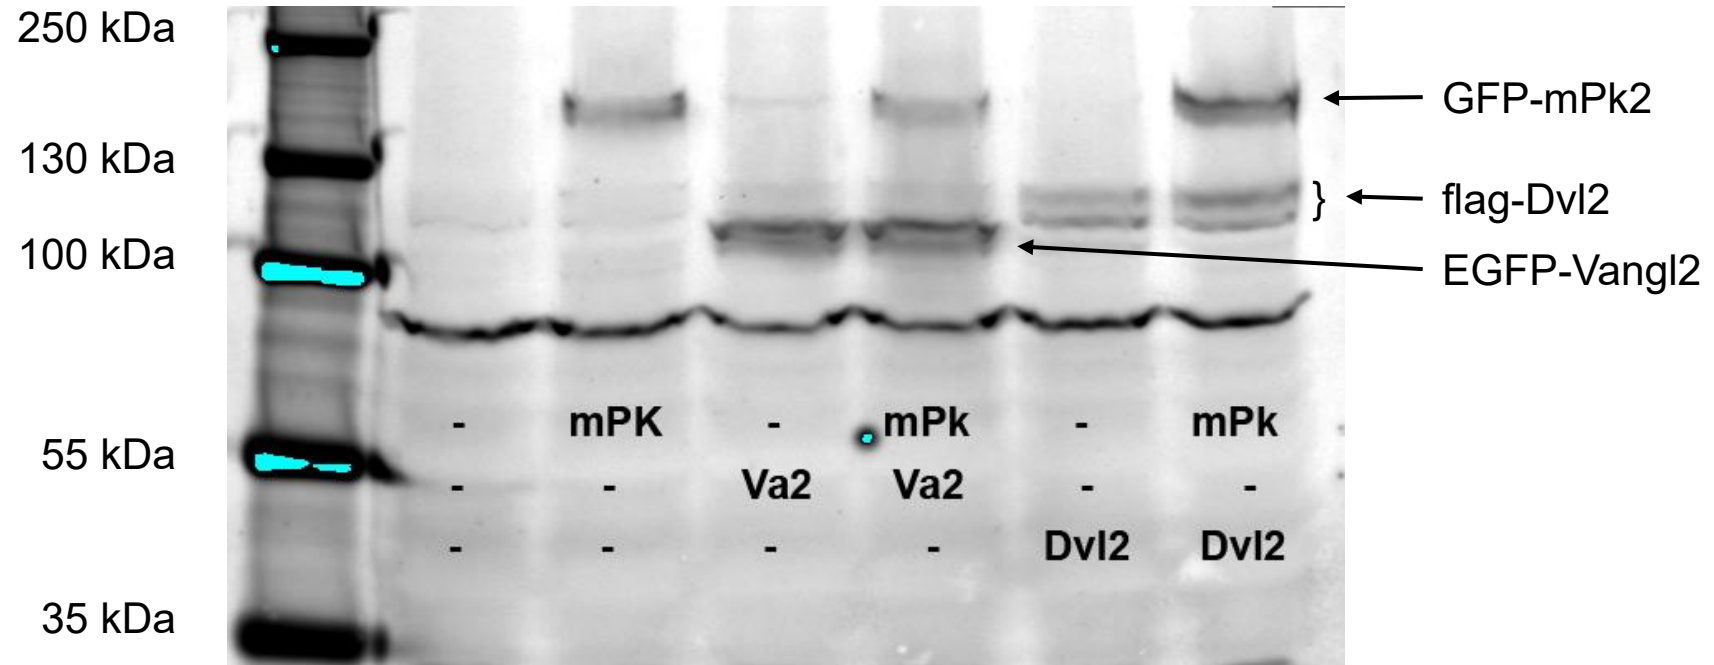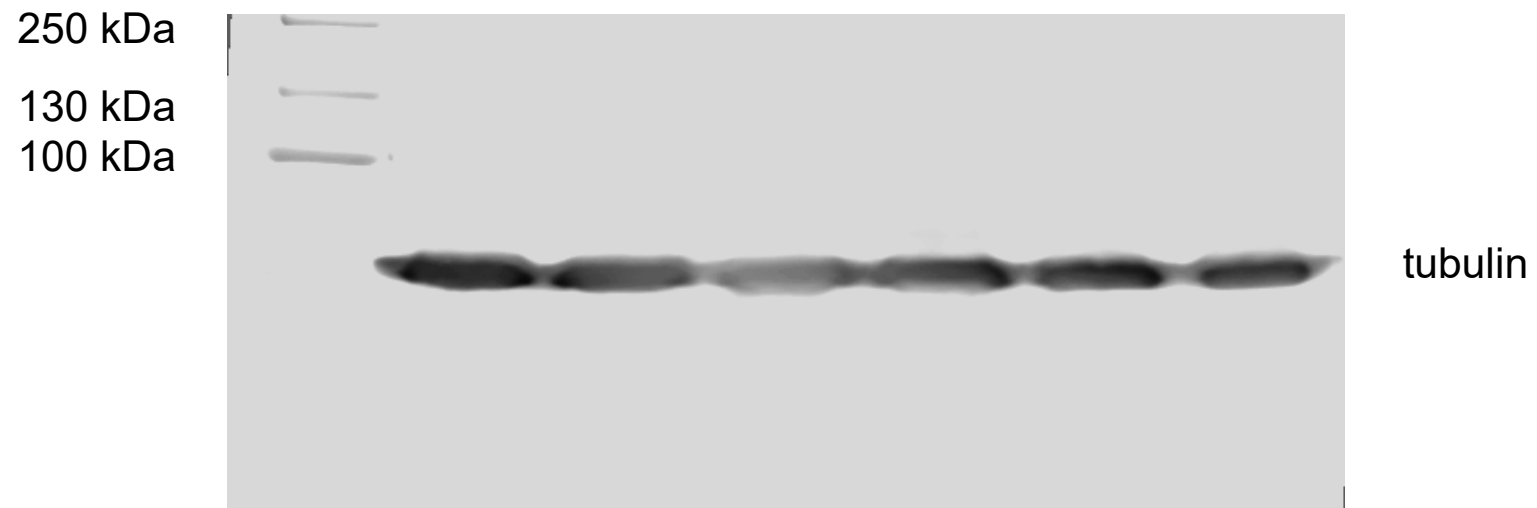

Fig 2 Sup 1 b

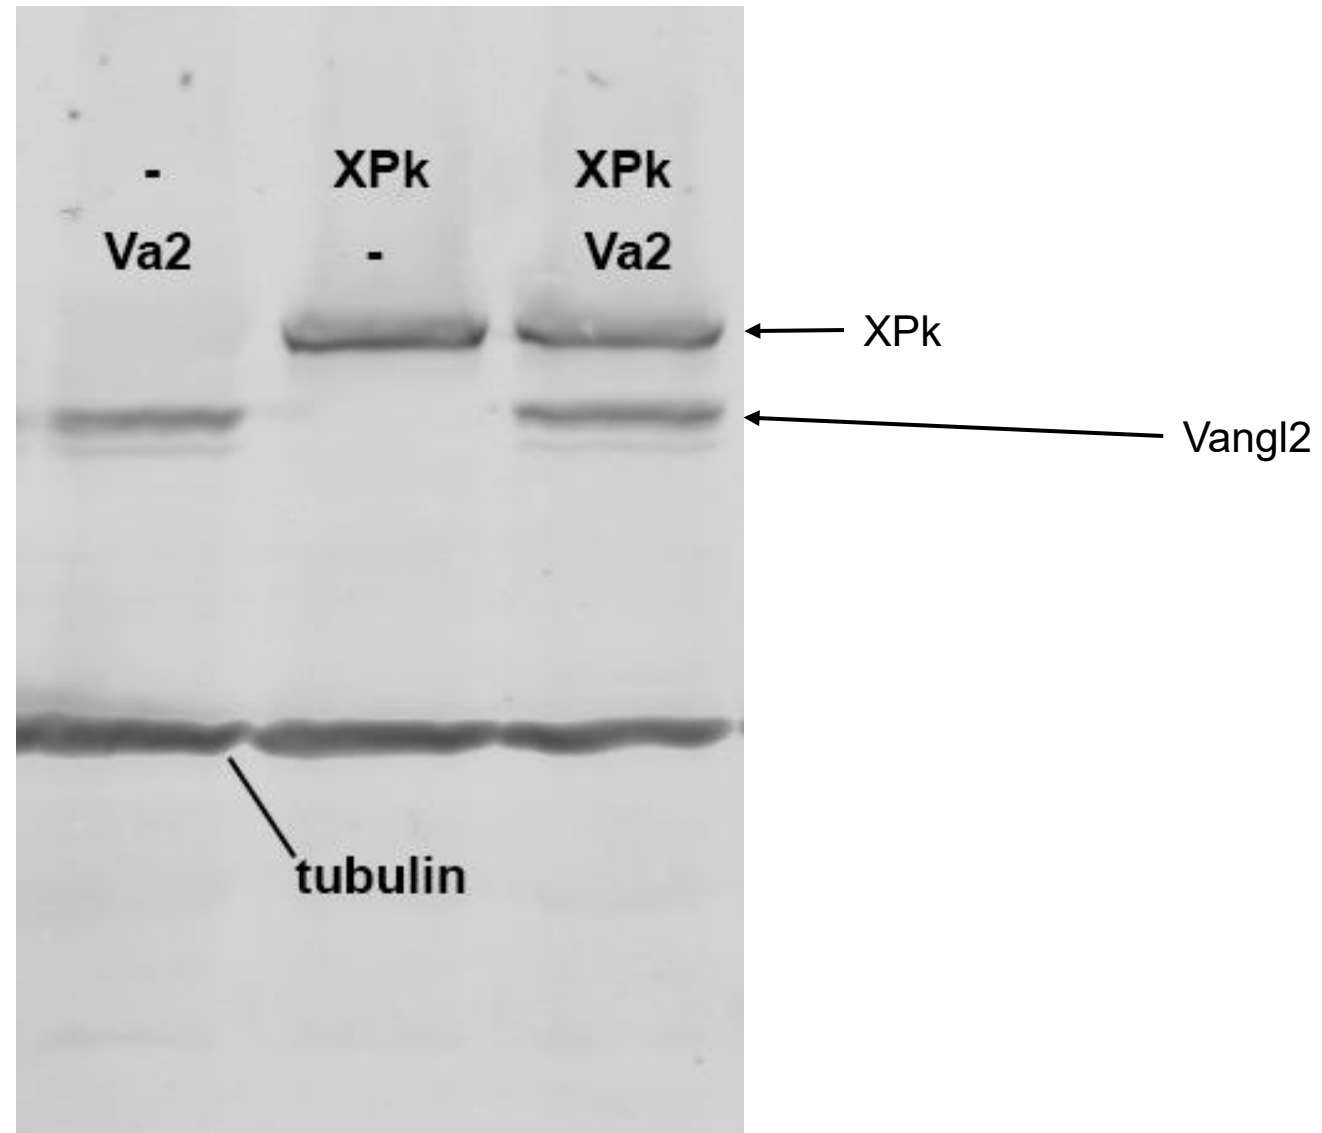

Fig 2 Sup 1 c

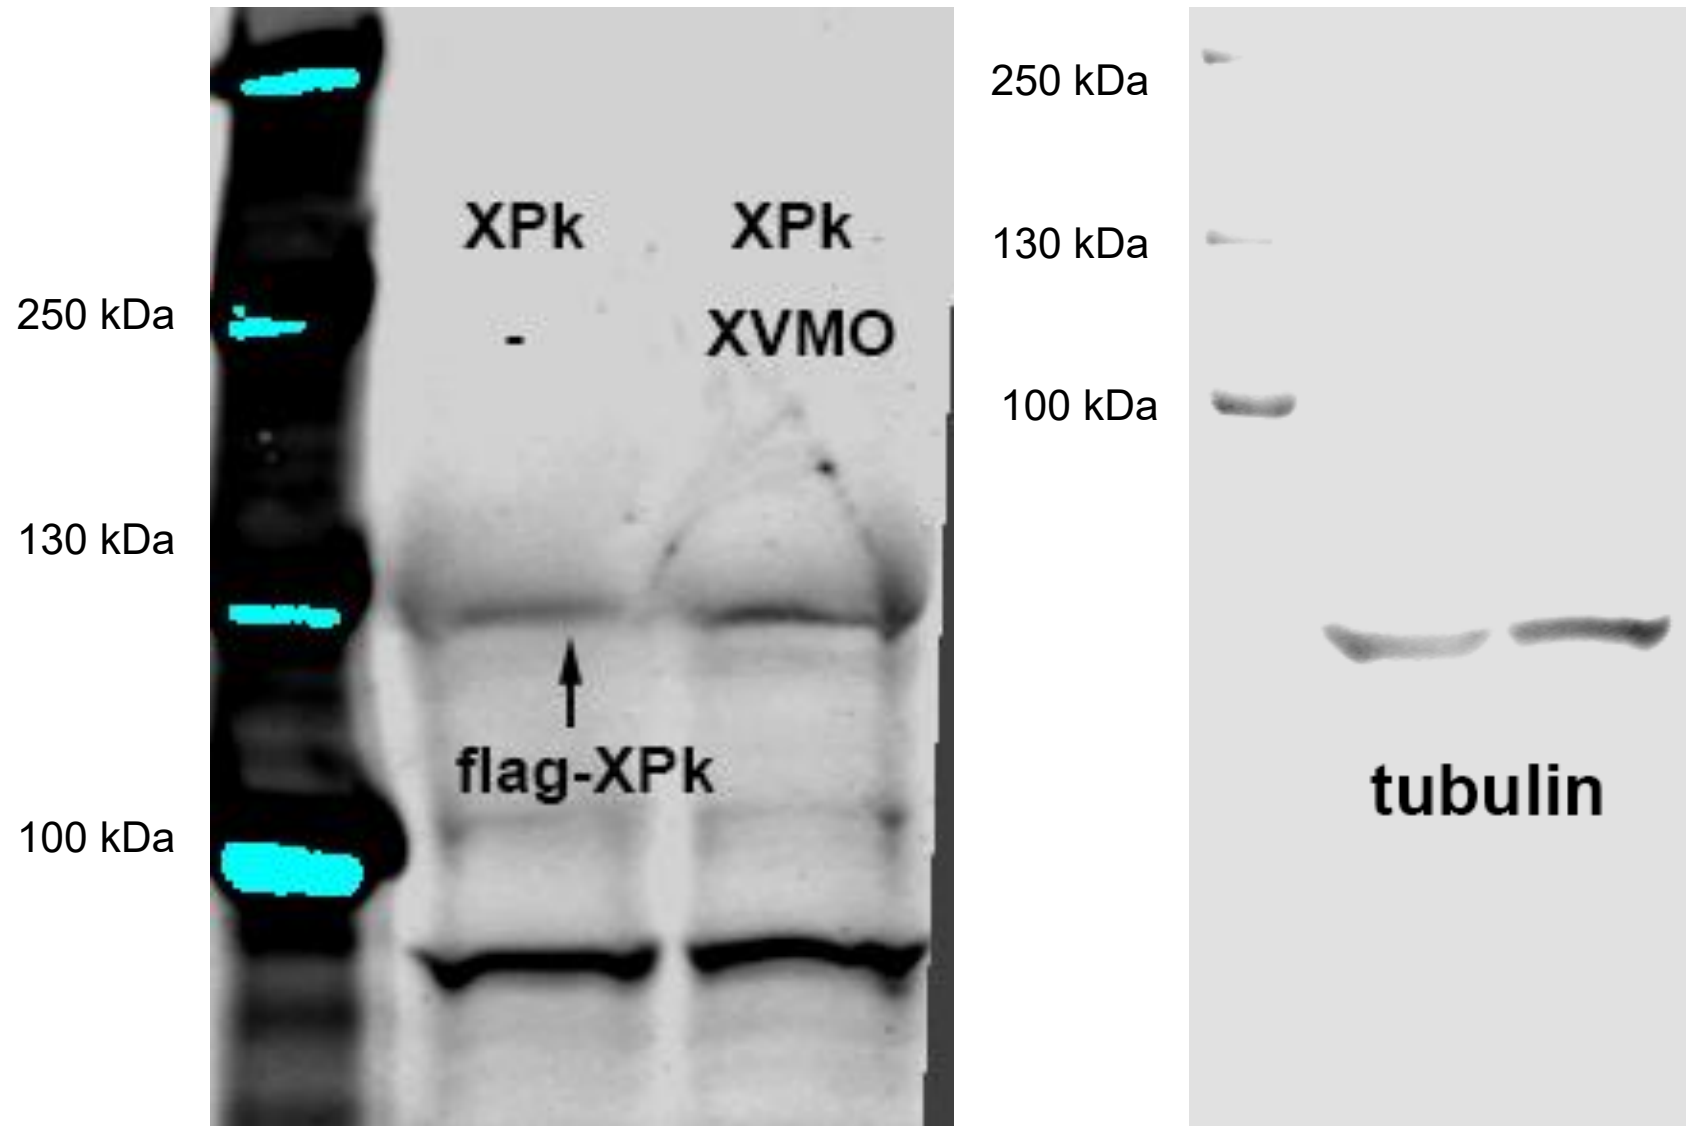

Fig 2 Sup 1 d

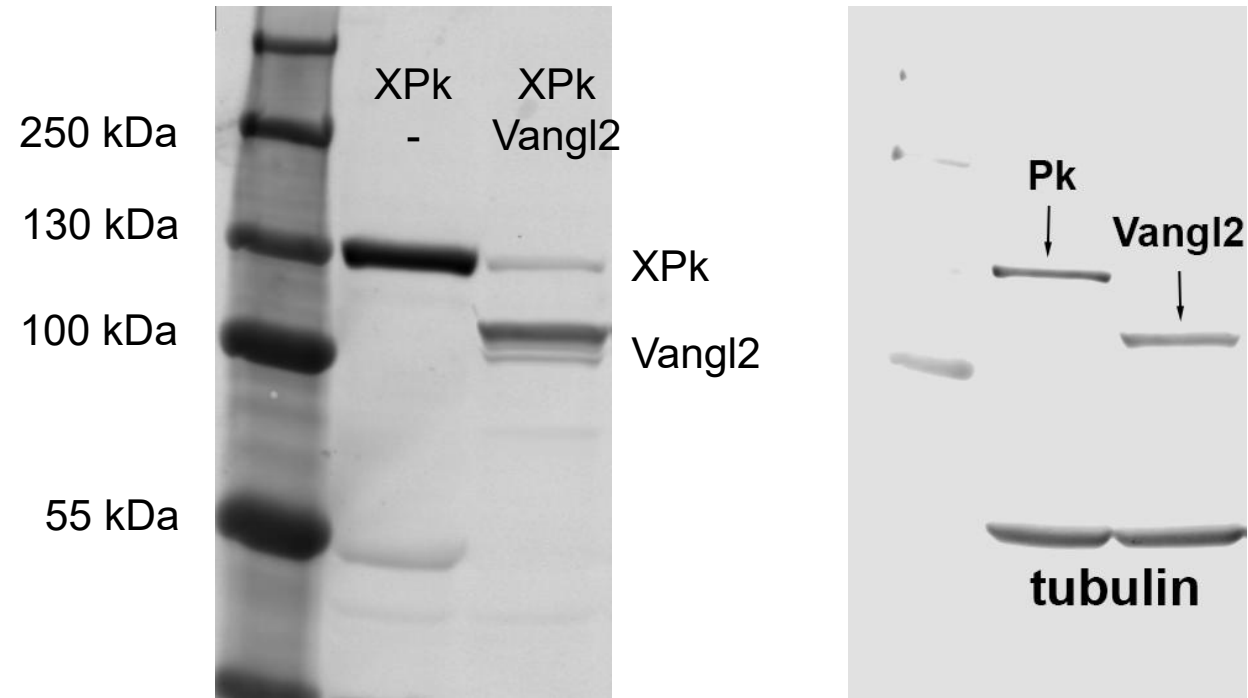

Supplement: fig2-figsupp1-data1 [file Figure 2 sup 1-source data_1.pdf › Figure 2 sup 1-source data_1.pdf]

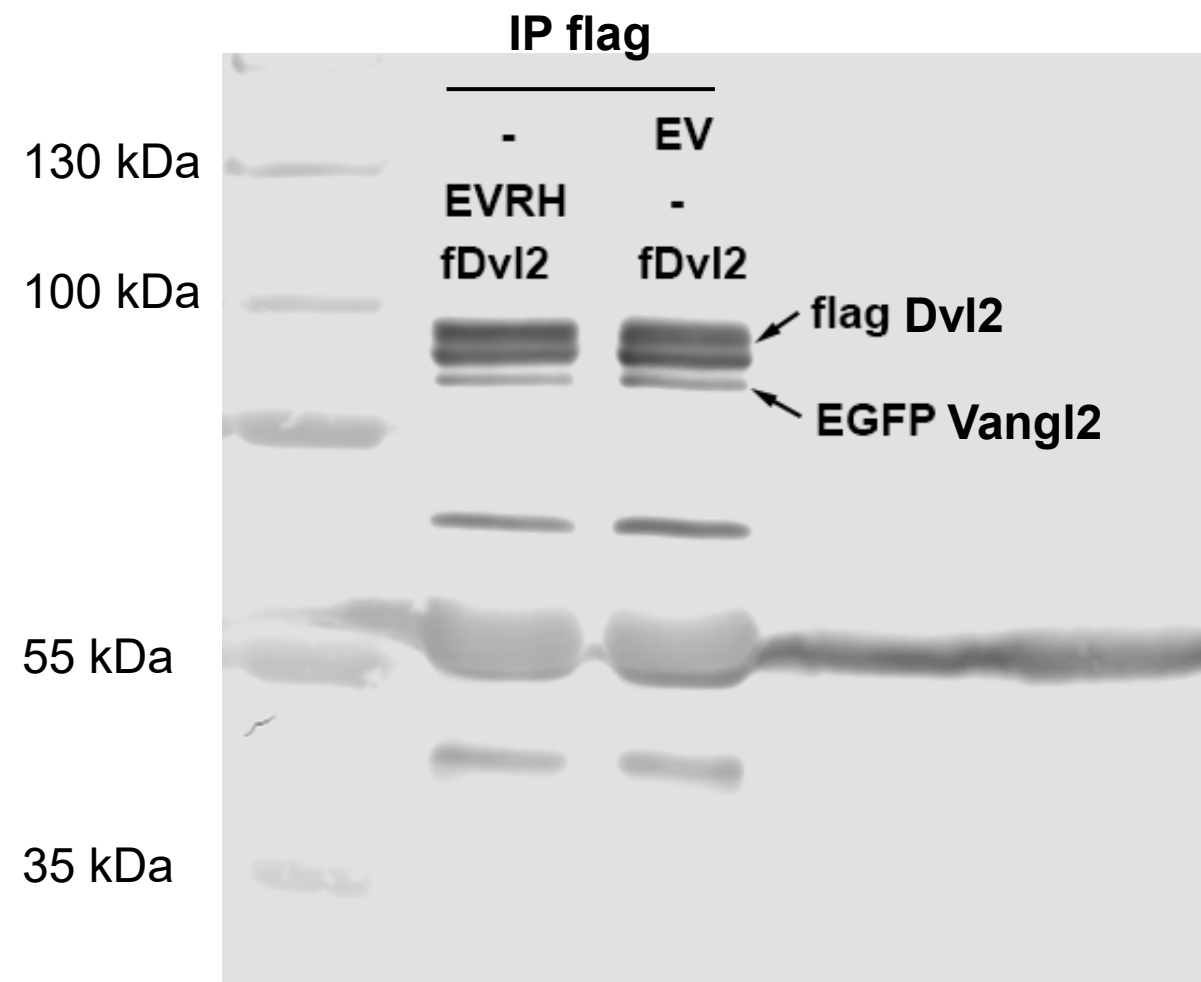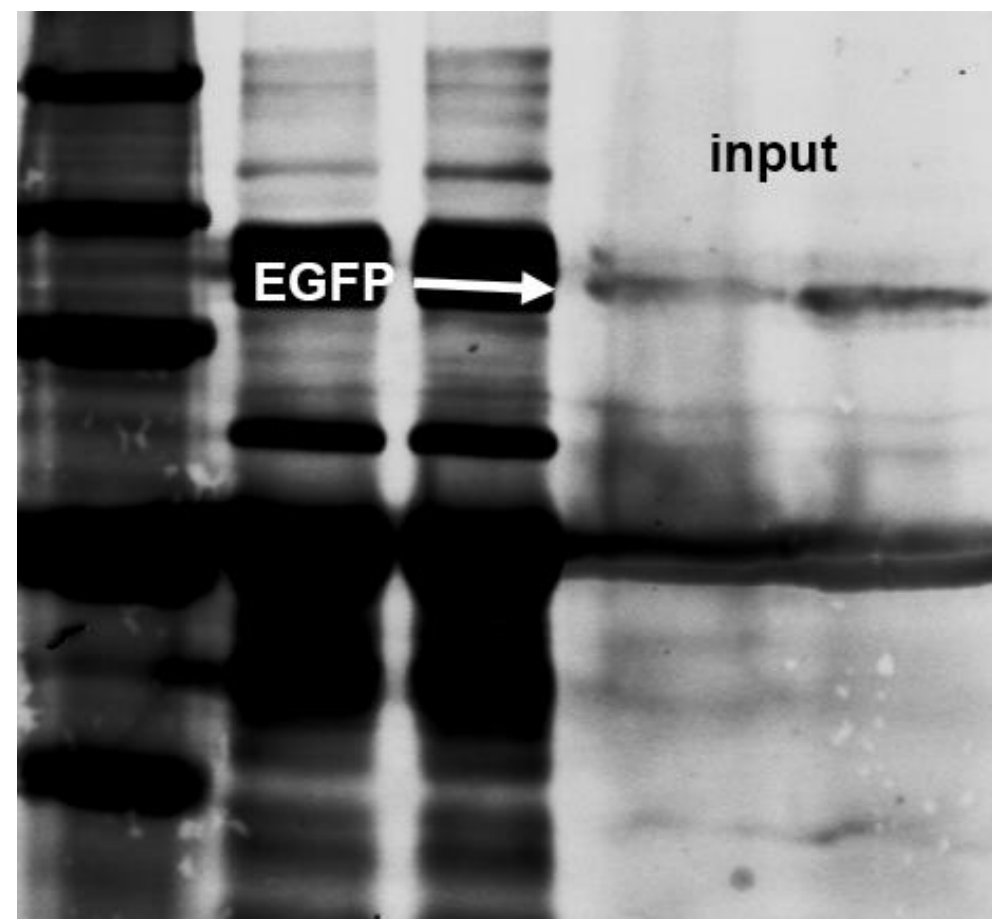

Supplement: fig2-figsupp4-data1 [file Figure 2 sup 4e- source data 1.pdf › Figure 2 sup 4e- source data 1.pdf]

EGFP-Vangl2

+ + + + - + + + + -

Flag-Dvl2

+ + + + - + + + + -

xWnt11

- + - + - - + - + -

mPK2-GFP

- - + + - - - + + -

130 kDa

input

Co-IP

100 kDa

EGFP-Vangl2

55 kDa

35 kDa

IB Vangl2

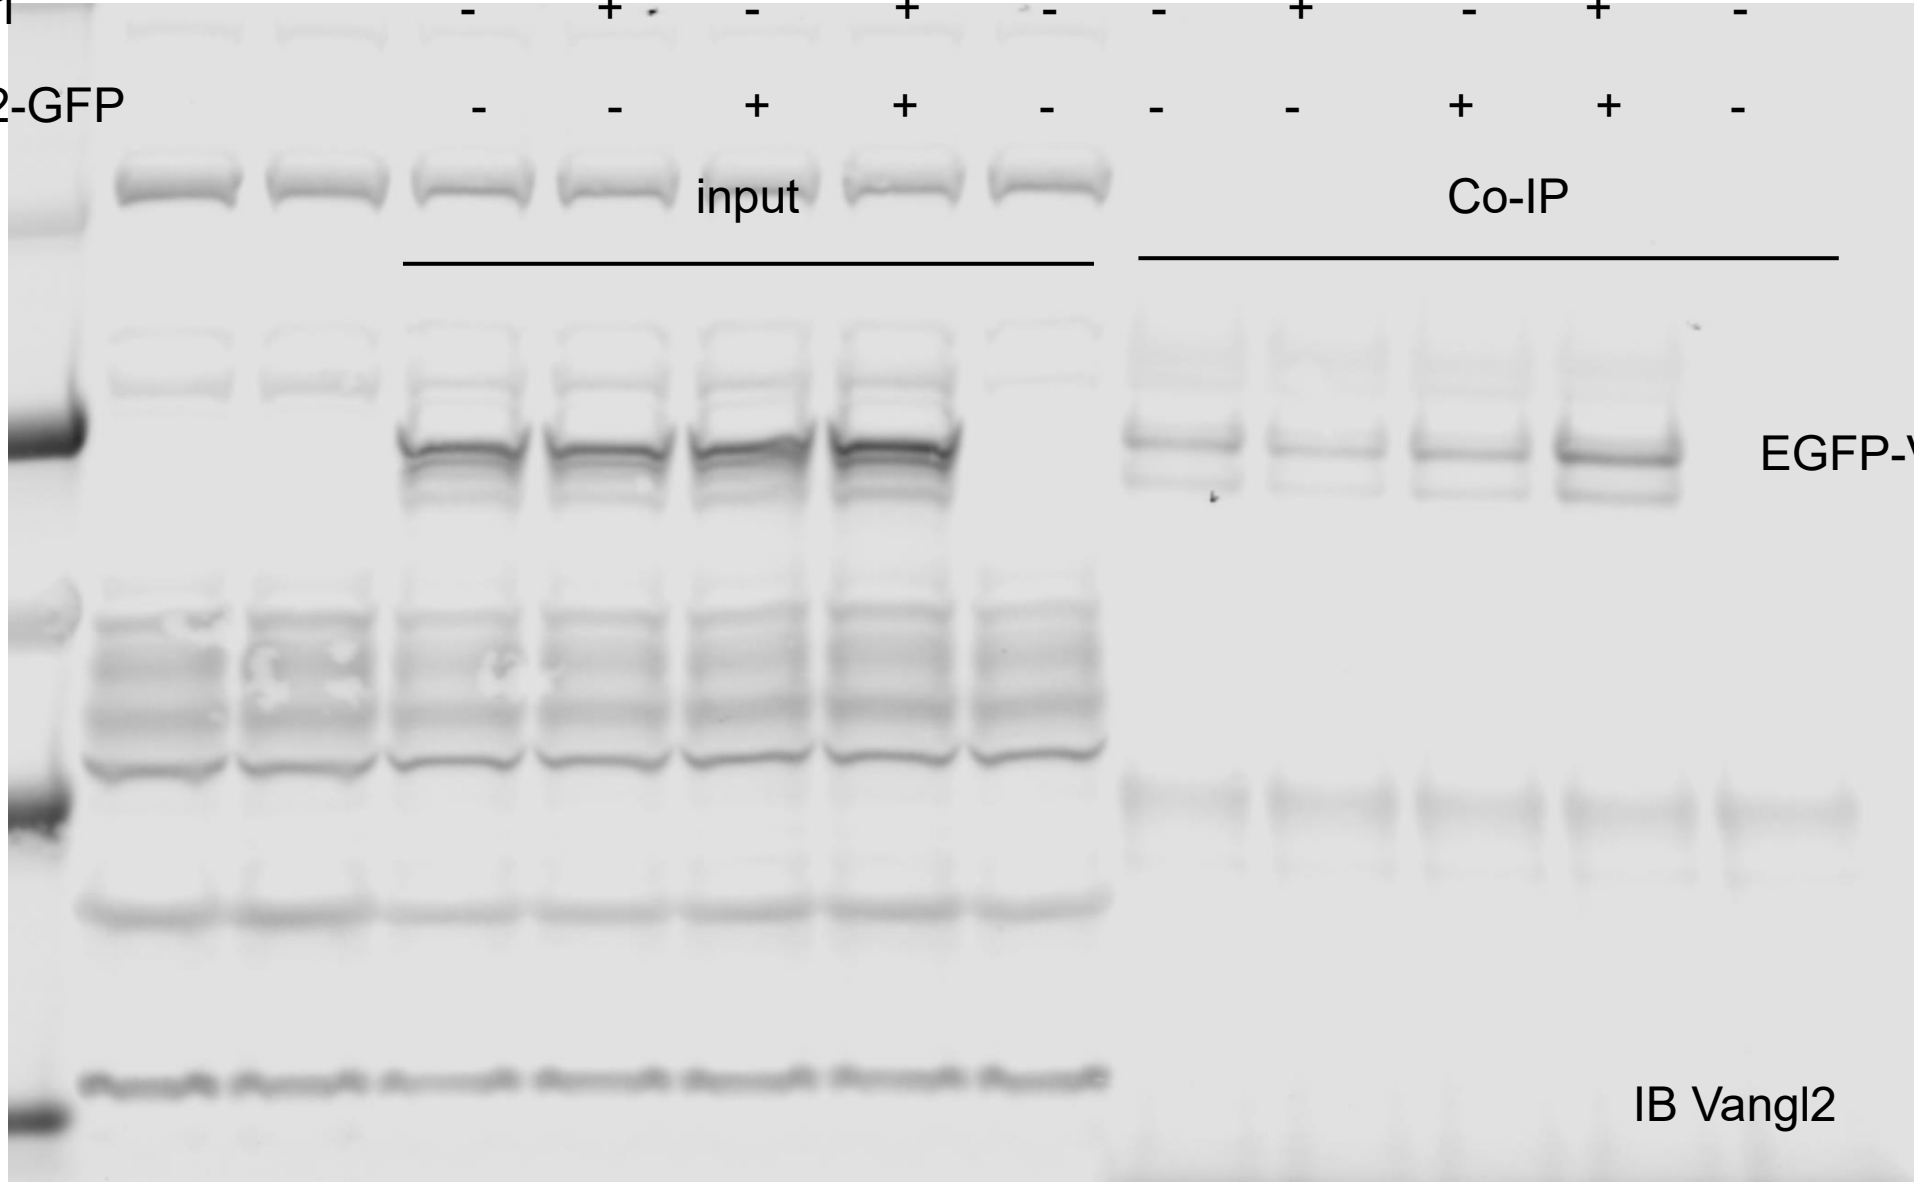

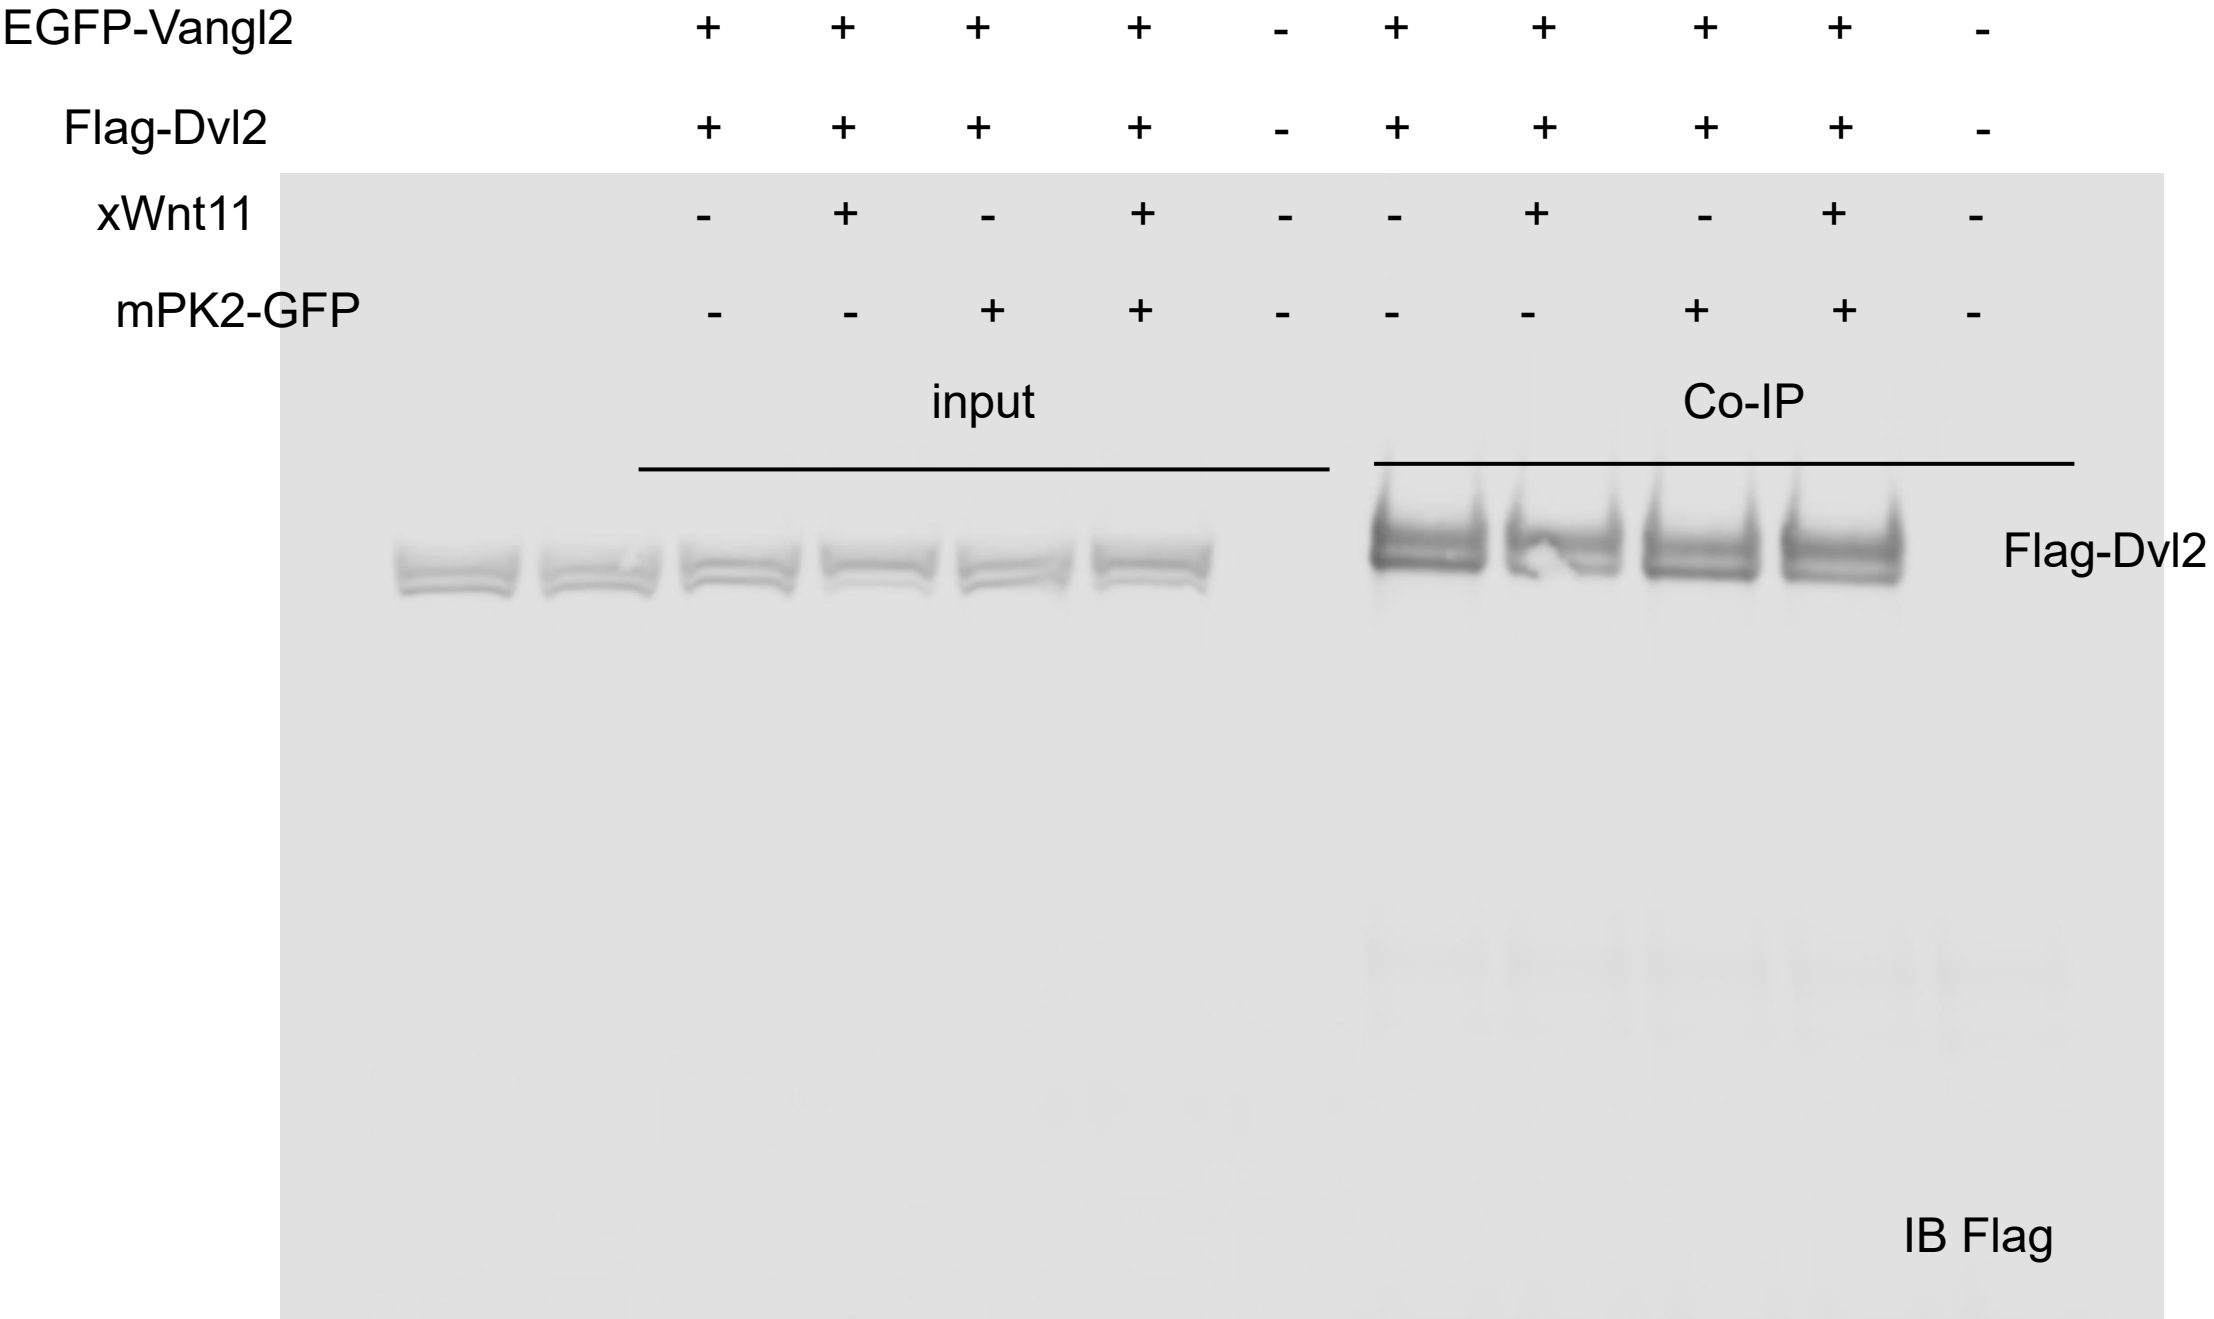

Supplement: fig3-figsupp2-data1 [file Figure 3 suppl 2a- source data 1.pdf › Figure 3 suppl 2a- source data 1.pdf]

Fig 6a

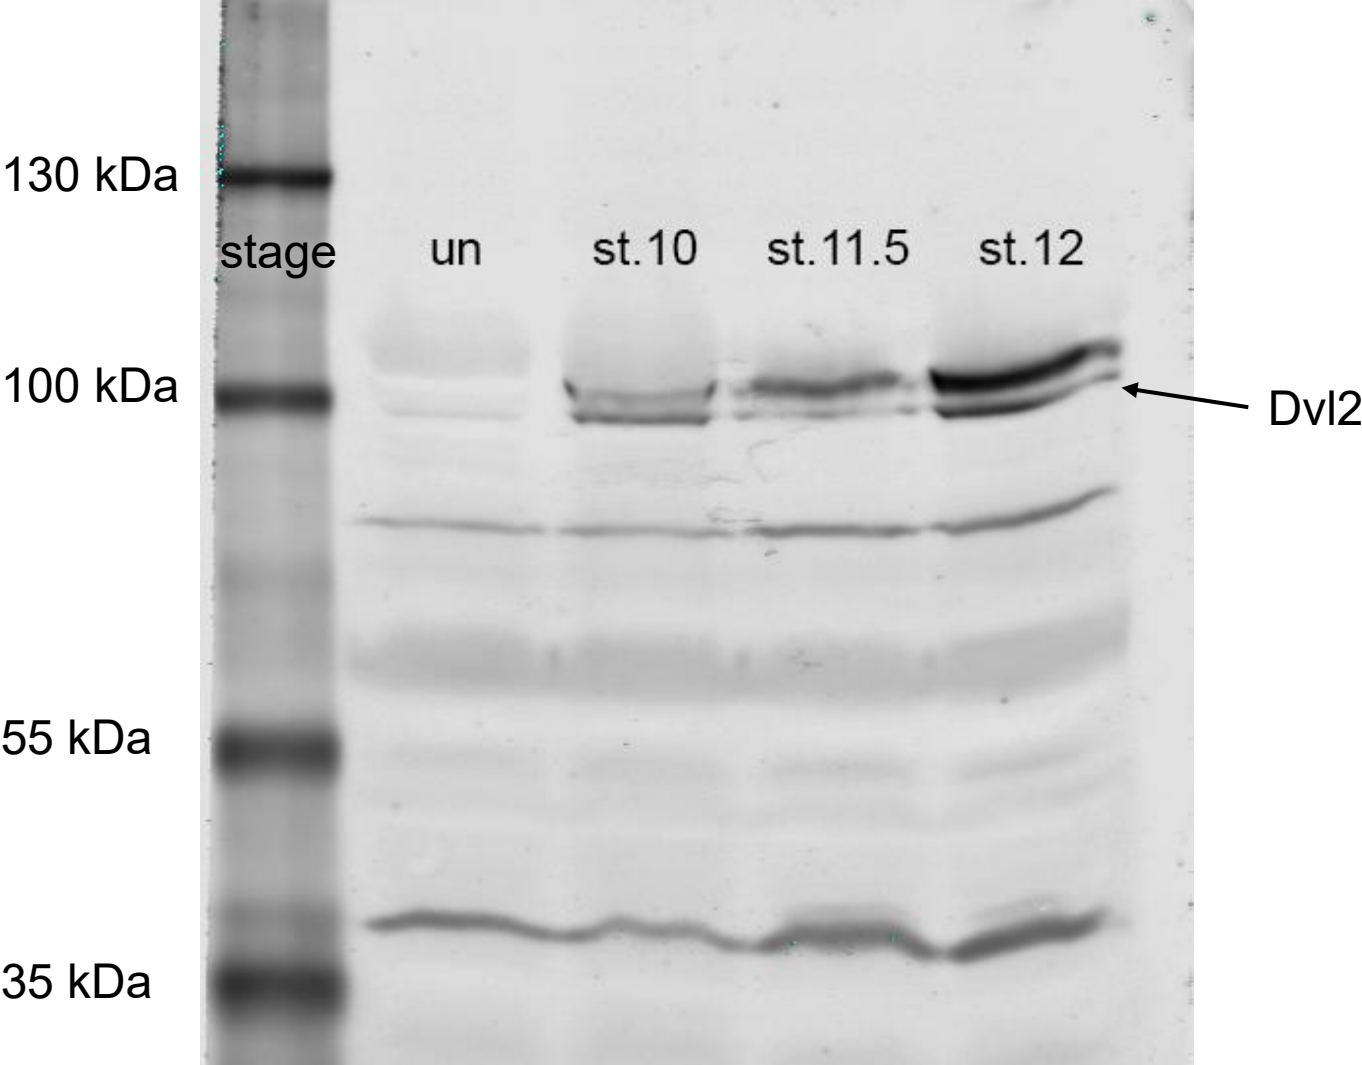

Fig 6b

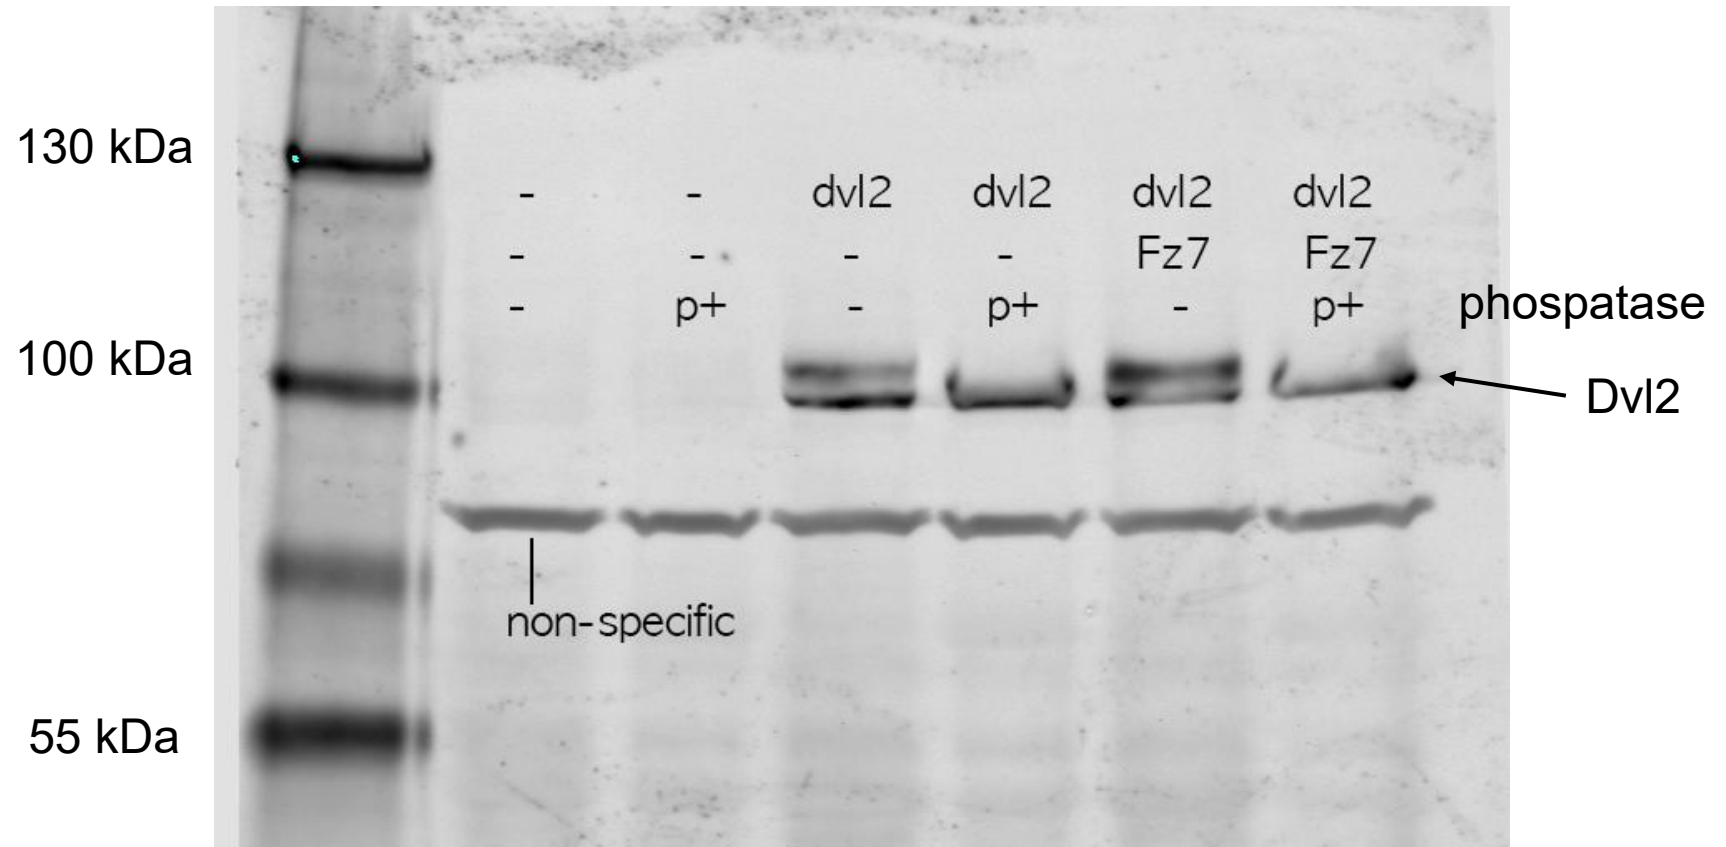

Fig 6c

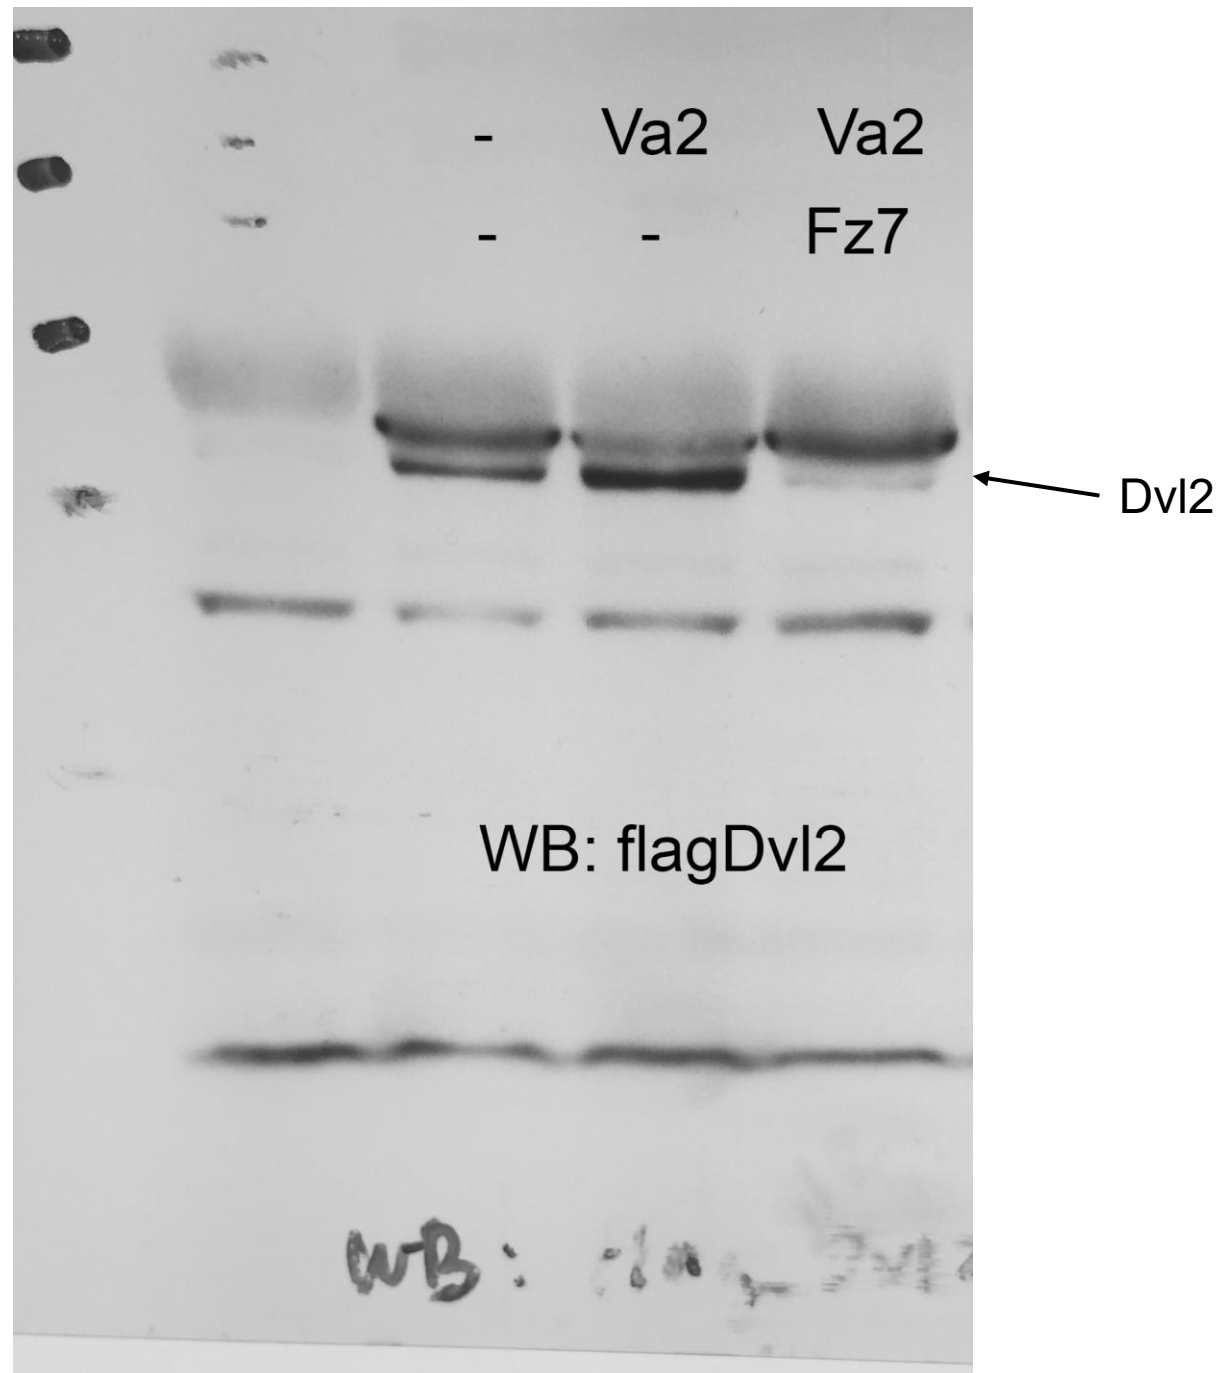

Fig 6d

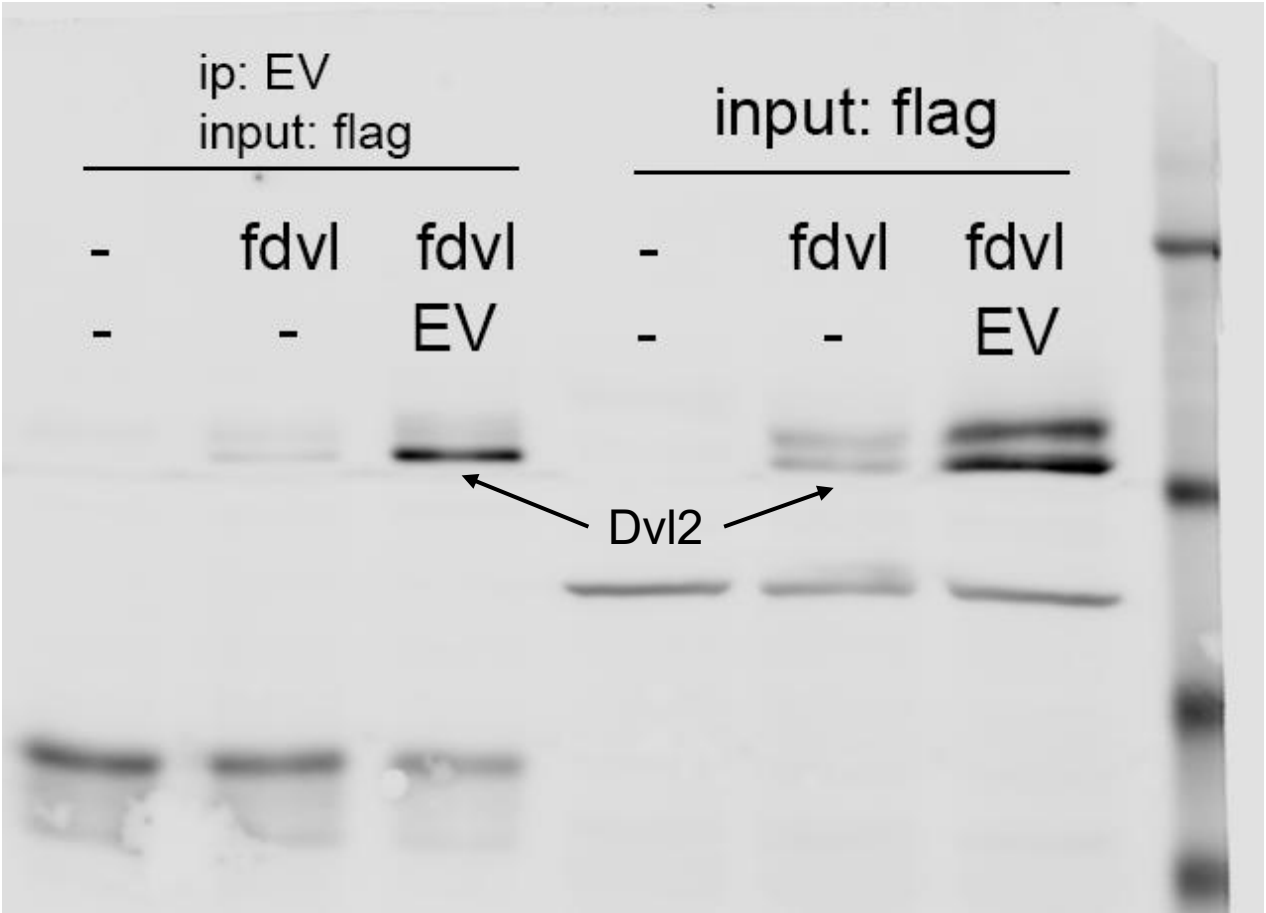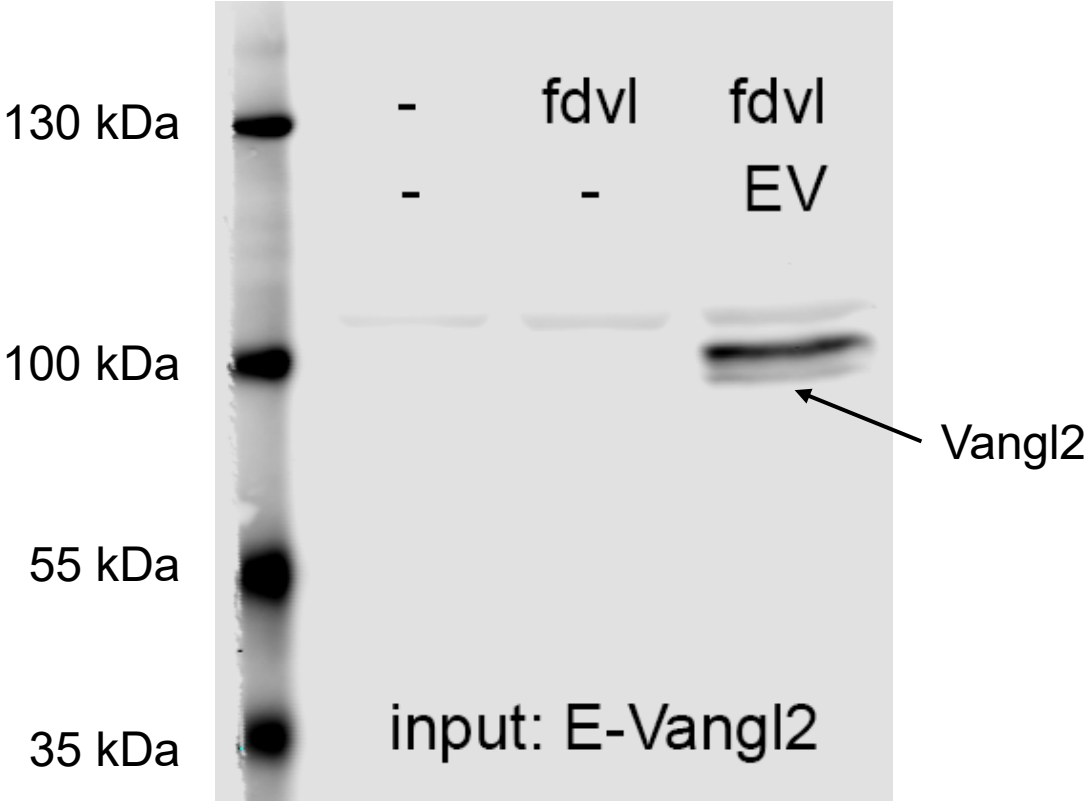

Fig 6e

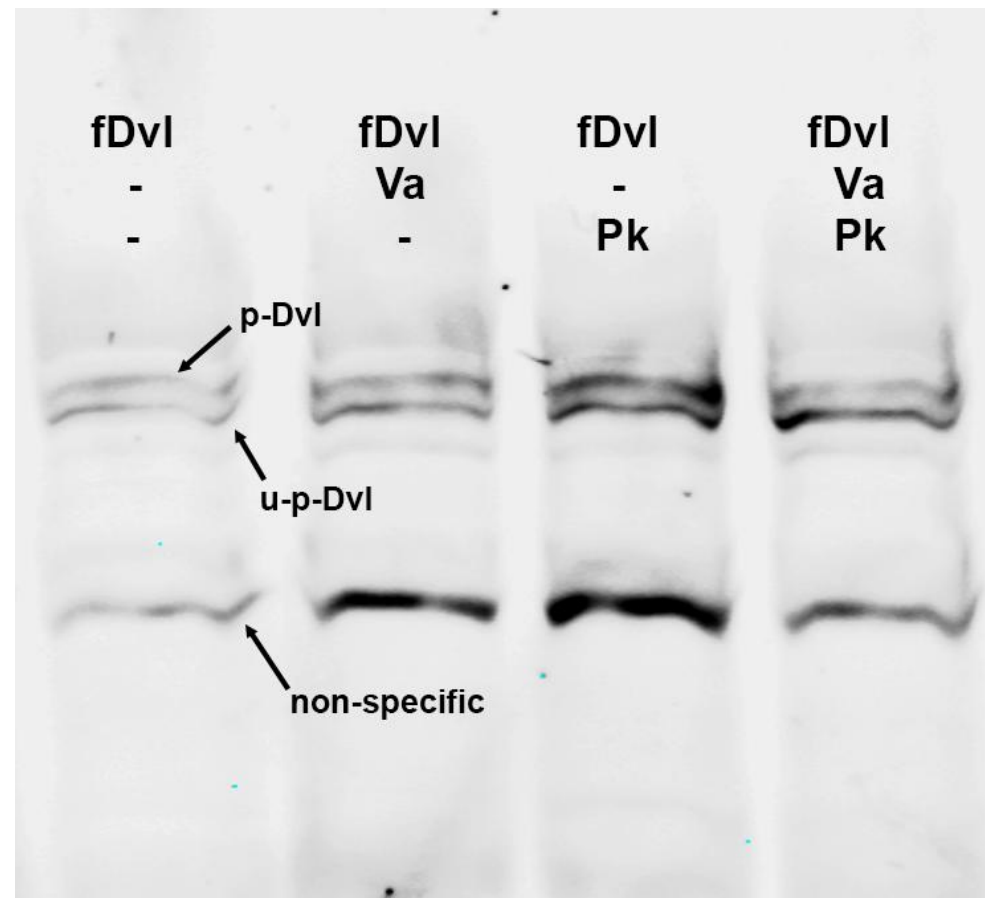

Supplement: fig6-data1 [file Figure 6-source data 1 .pdf › Figure 6-source data 1 .pdf]

Fig 7 sup 2a     High-exposure

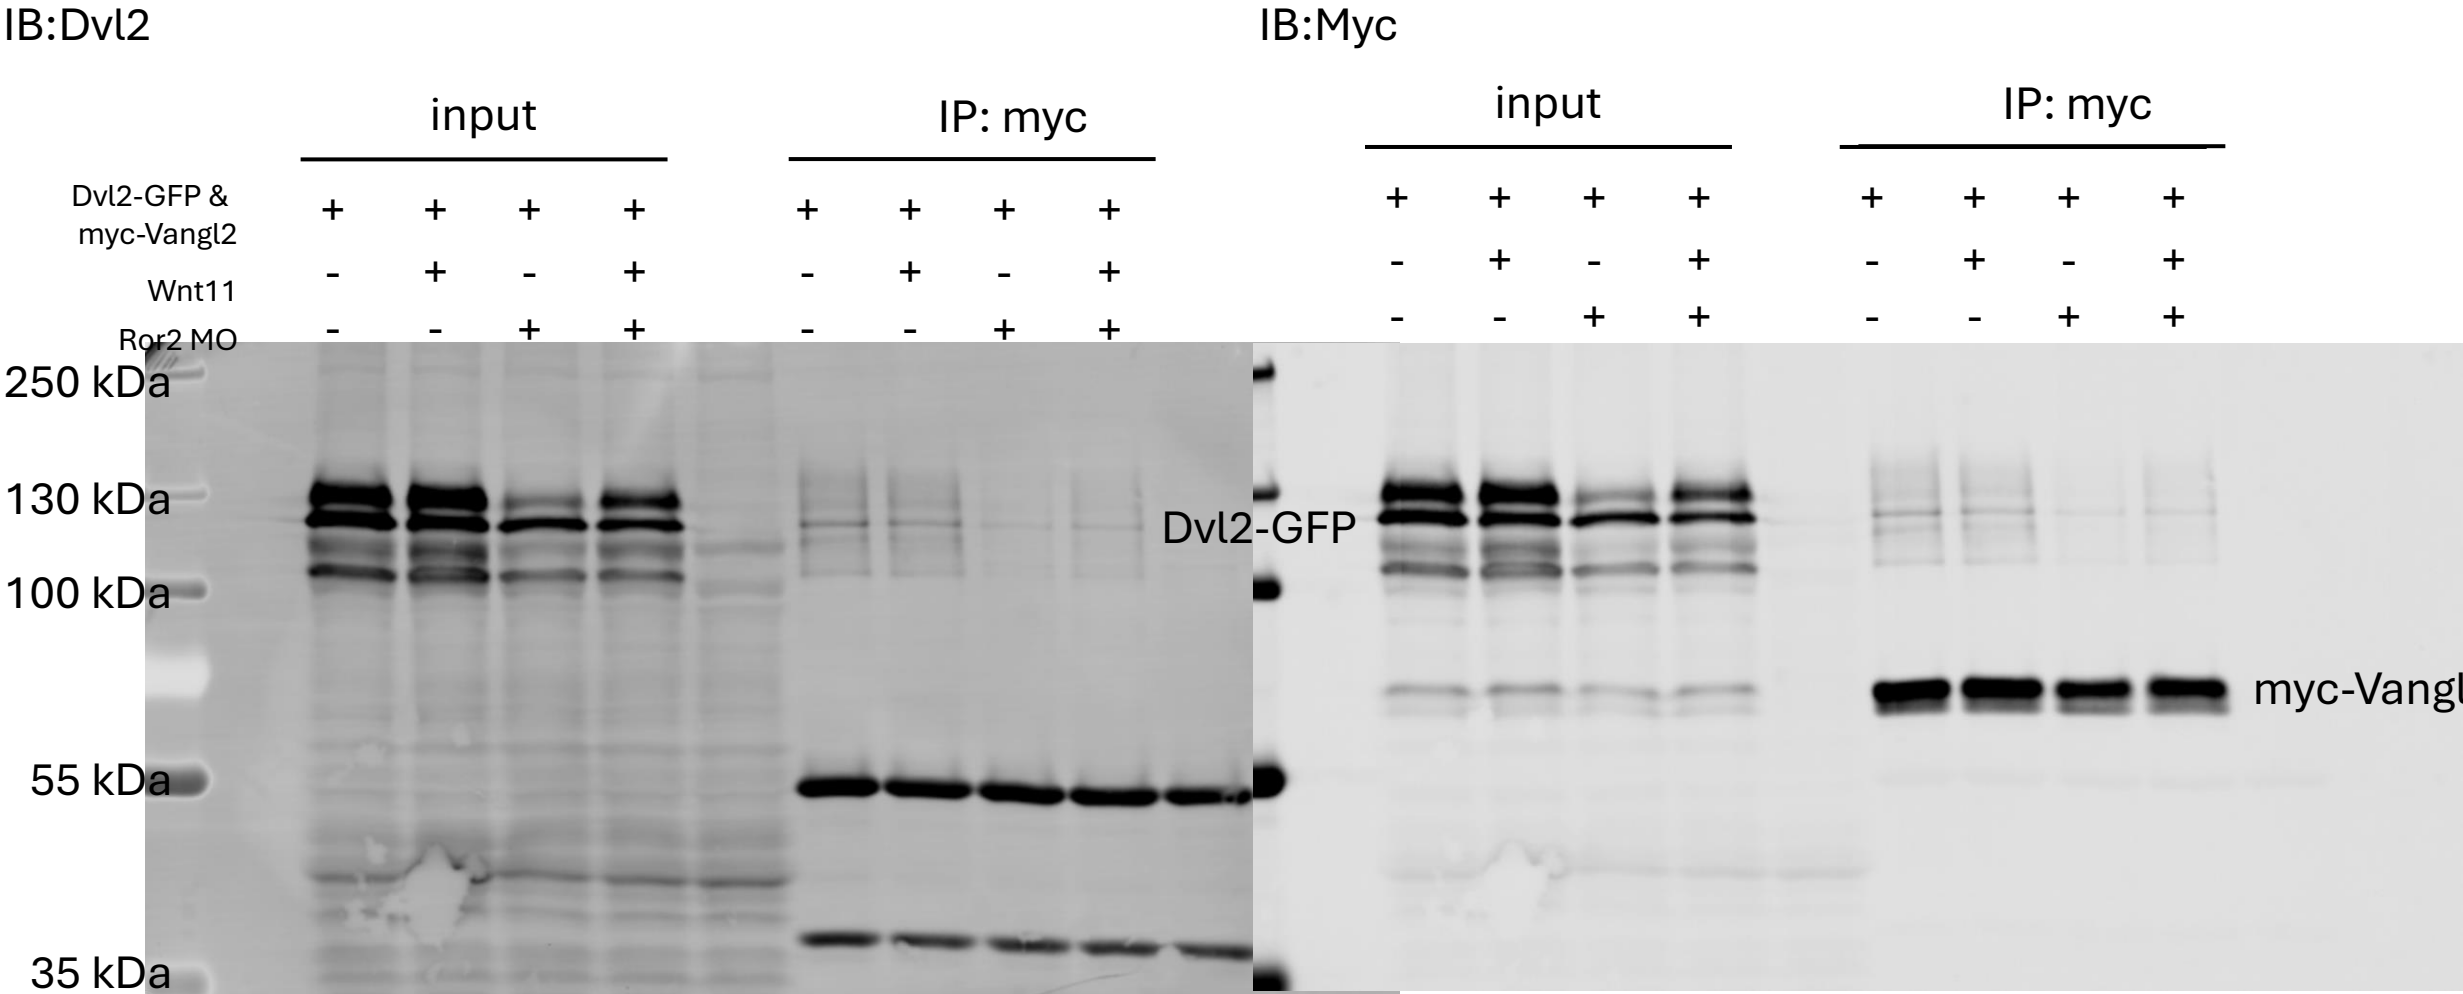

Fig 7 sup 2a      low-exposure

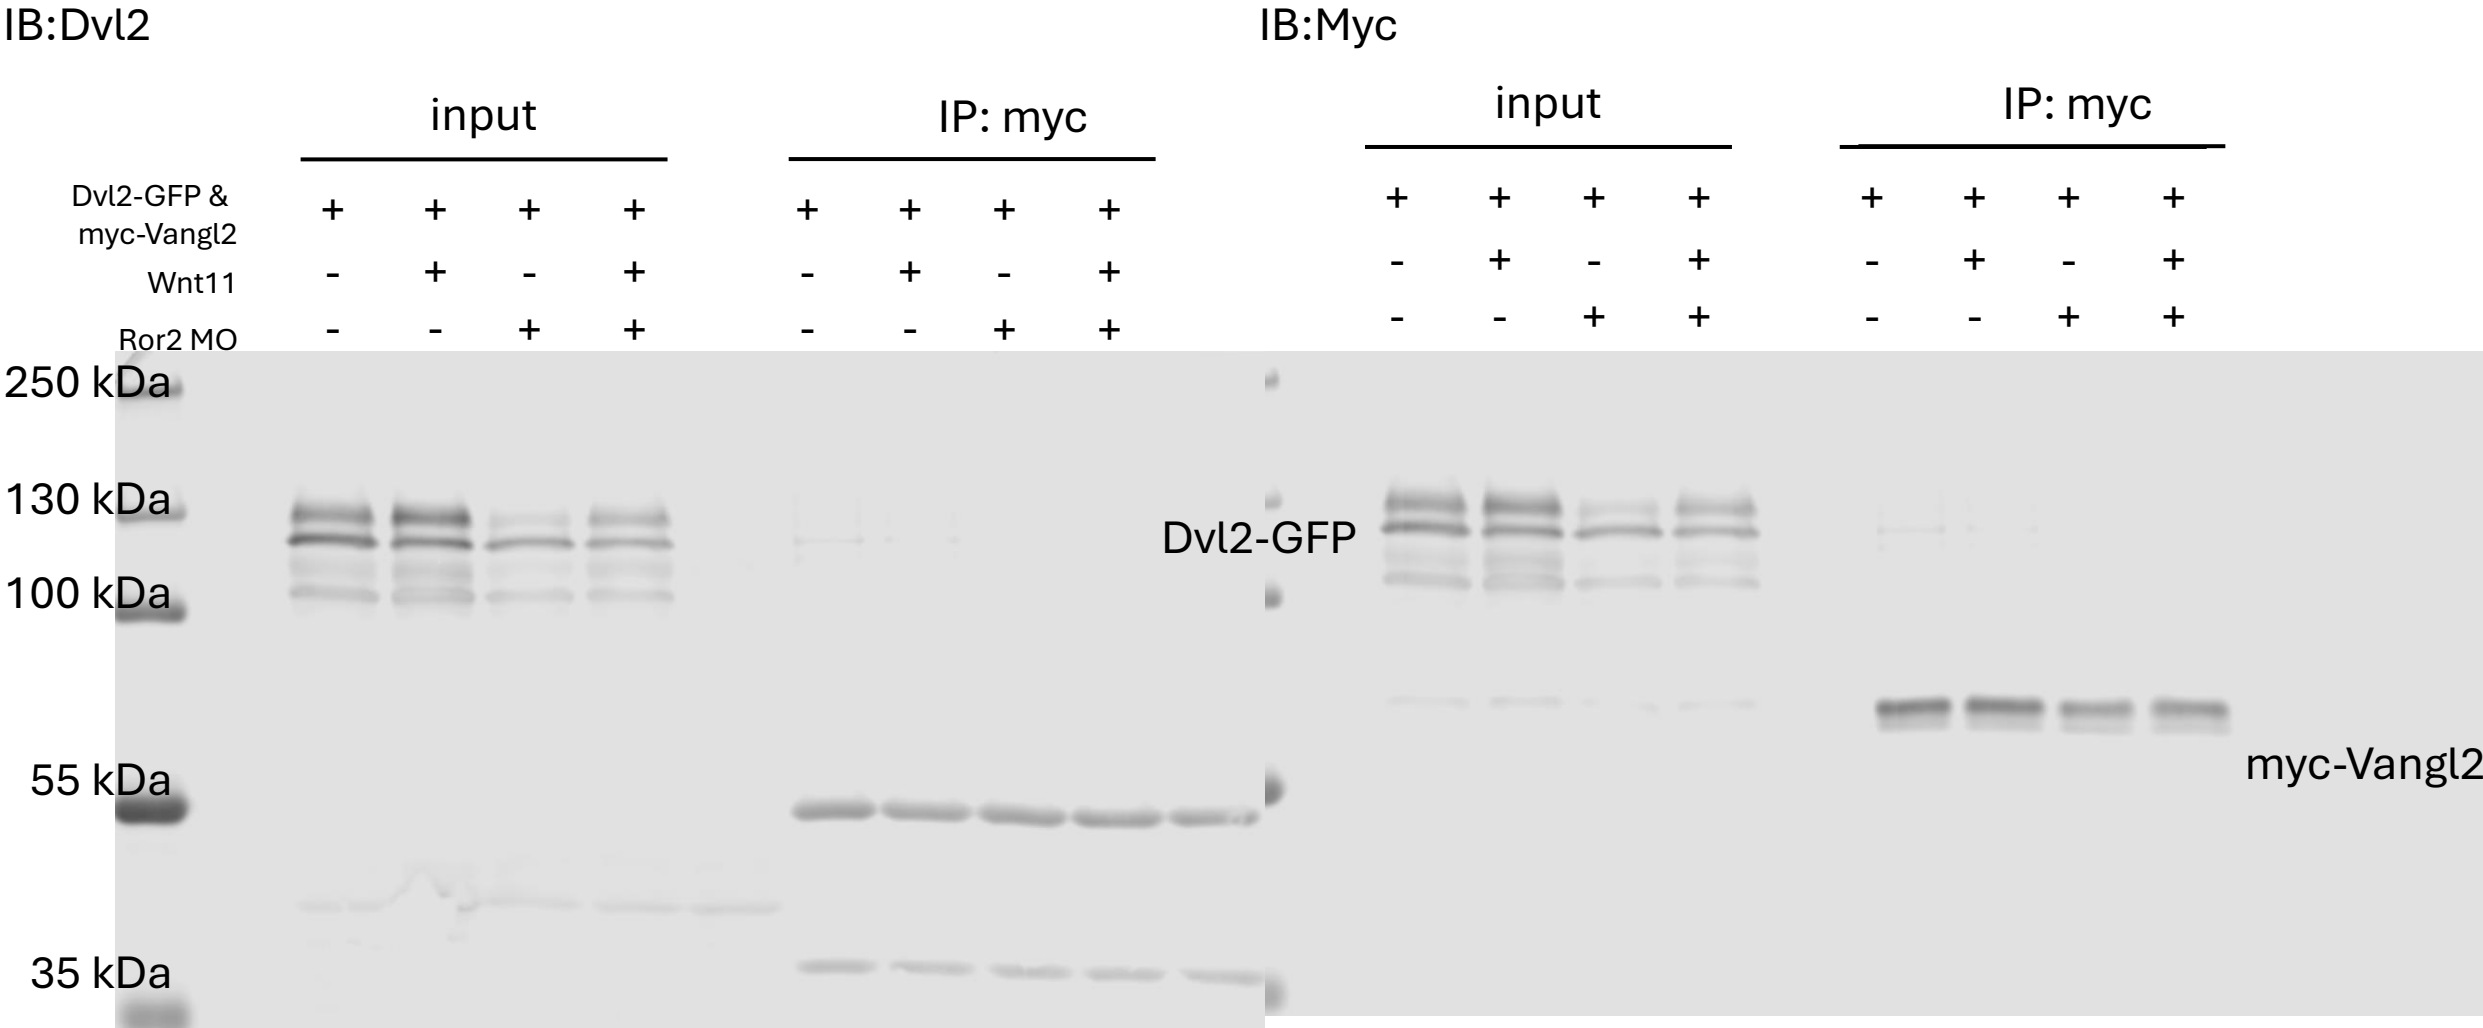

Fig 7 sup 2b

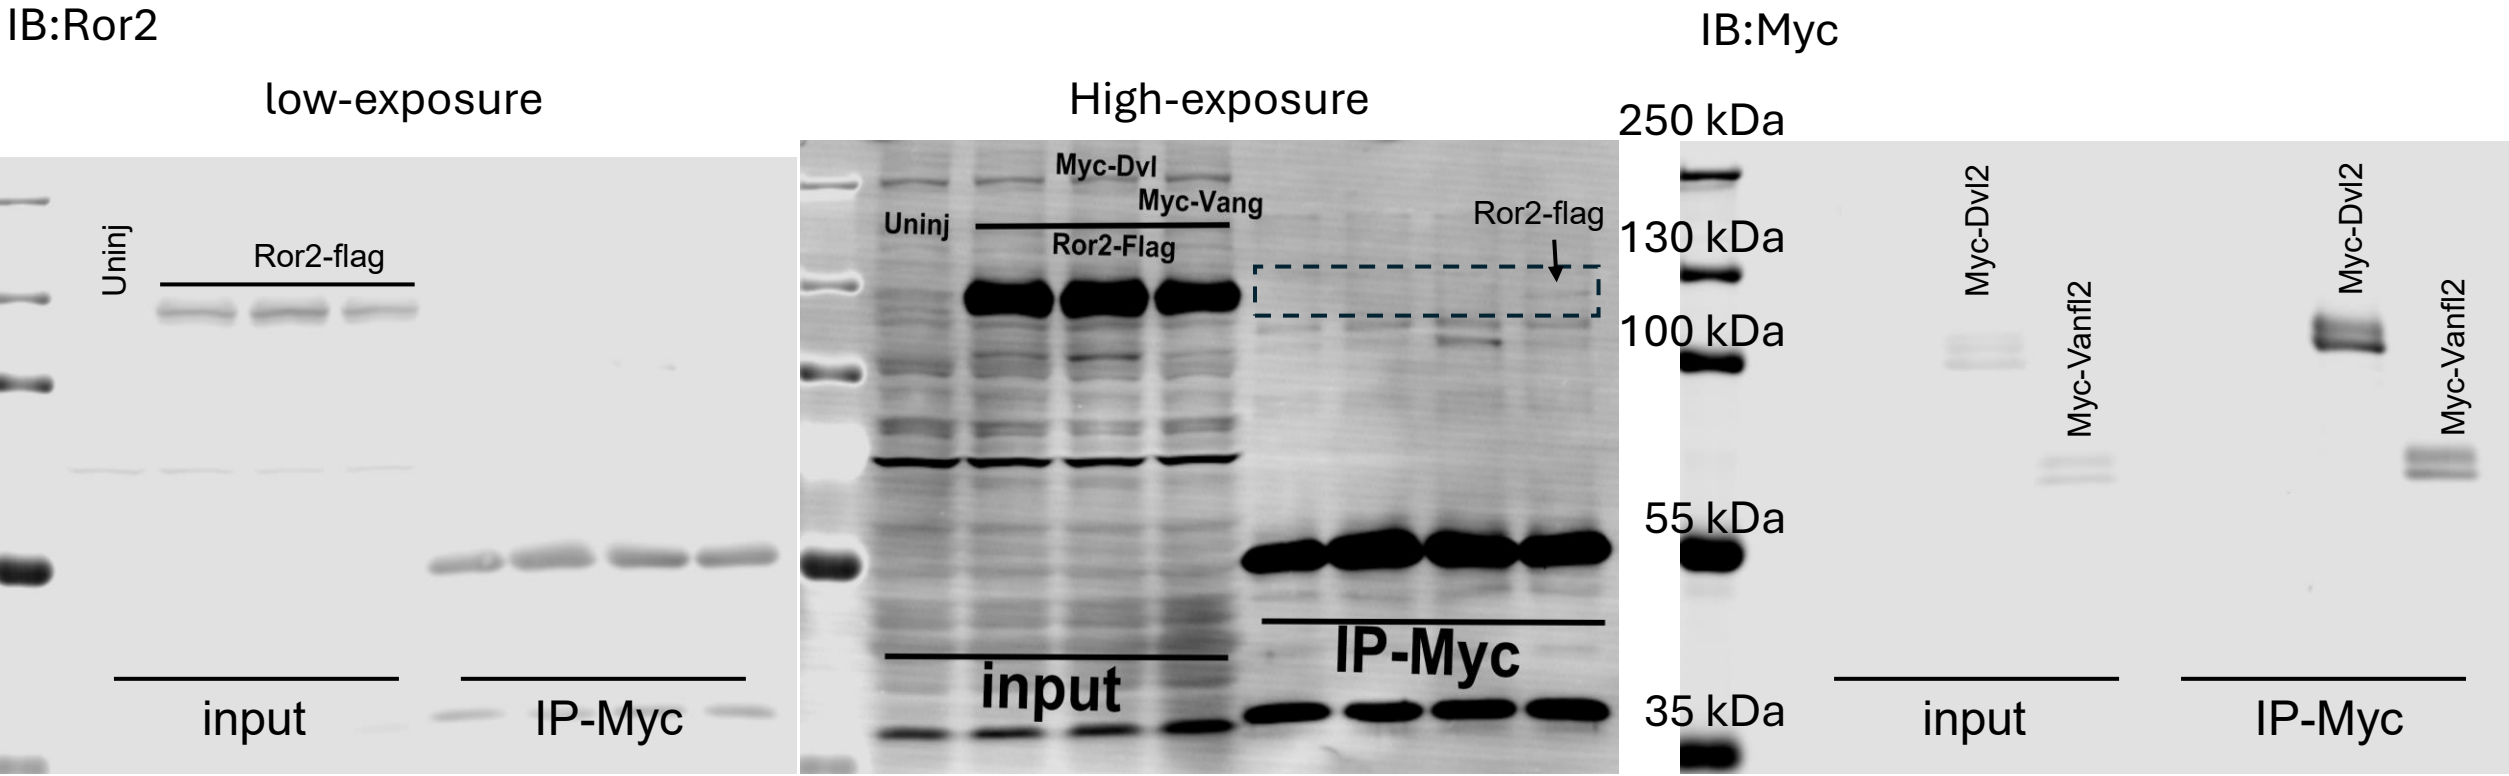

Fig 7 sup 2c

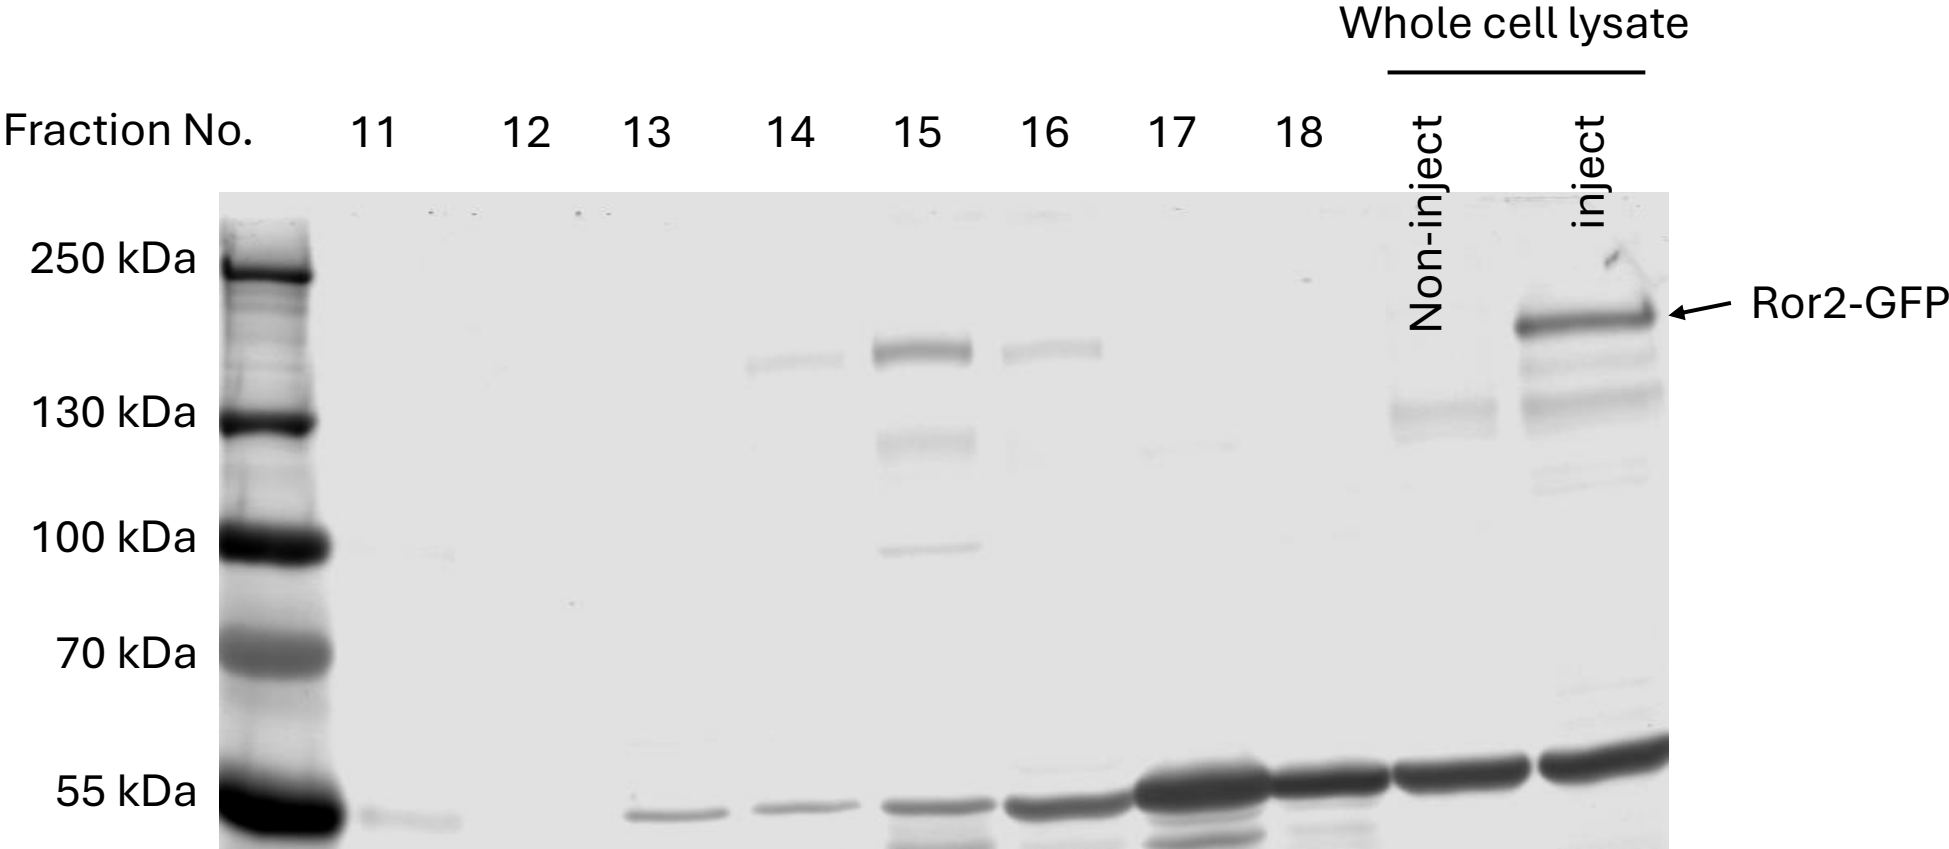

Fig 7 sup 2c

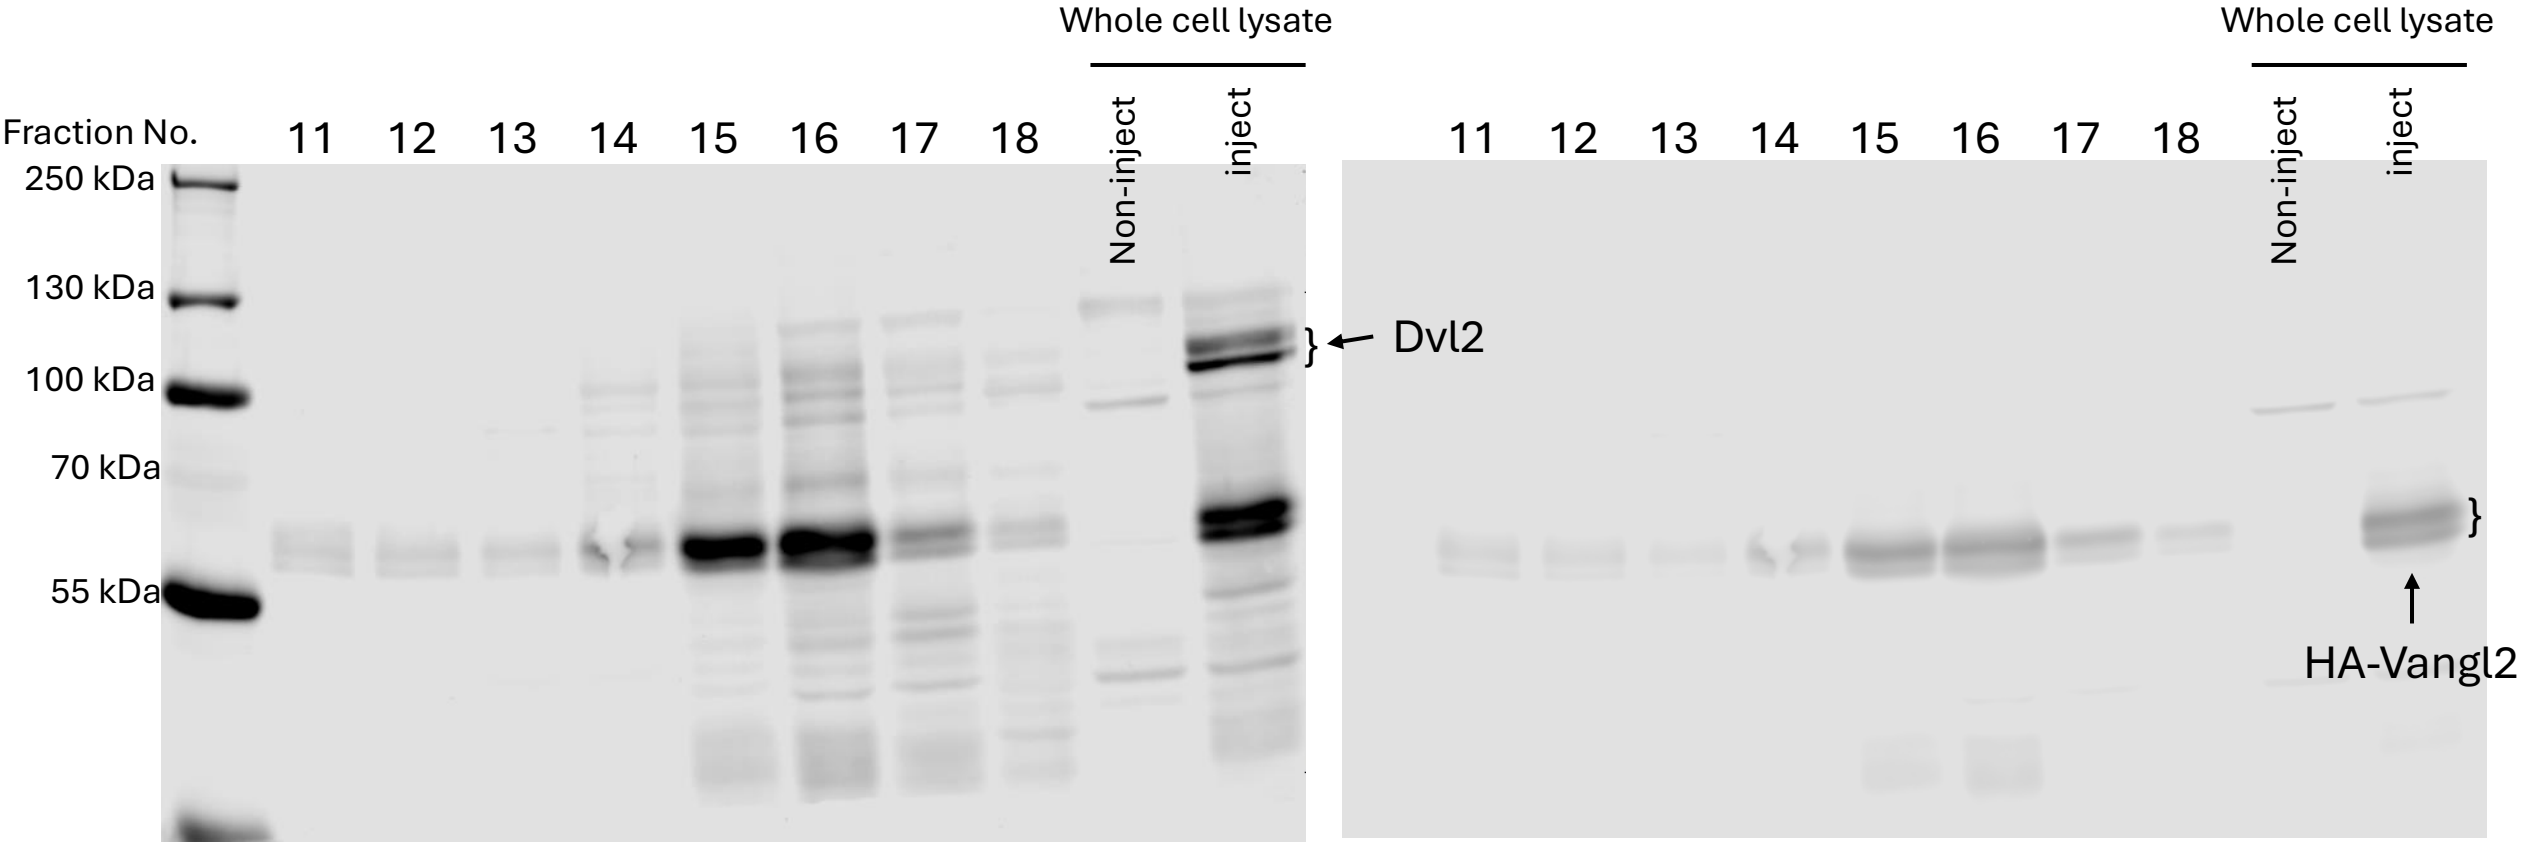

Supplement: fig7-figsupp2-data1 [file Figure 7 sup 2-source data 1.pdf › Figure 7 sup 2-source data 1.pdf]
